# Supplementary material
Source: MDPI journal article supplement (https://www.mdpi.com/2624-8611/2/4/24)

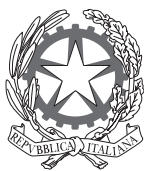

Ministero dell'Istruzione  
dell'Università e della Ricerca

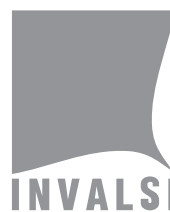

Istituto nazionale per la valutazione  
del sistema educativo di istruzione e di formazione

PROVA DI MATEMATICA - Scuola Primaria - Classe Quinta - Fascicolo 1

## Rilevazione degli apprendimenti

Anno Scolastico 2018 – 2019

# PROVA DI MATEMATICA

*Scuola Primaria*

**Classe Quinta**

**Fascicolo 1**

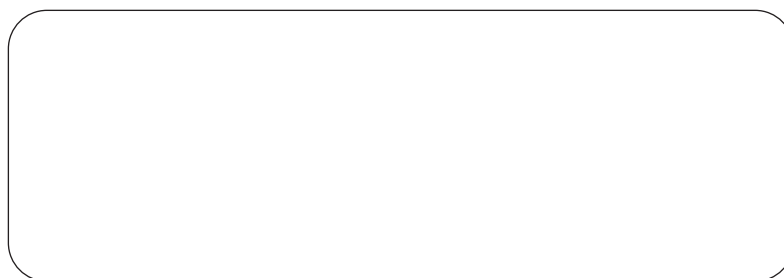

Spazio per l'etichetta autoadesiva

Gentile studente, desideriamo informarti che i dati relativi alla prova che stai per svolgere sono raccolti per le finalità stabilite da una legge nazionale (D.Lgs. n. 62 del 13 aprile 2017); la finalità è quella di rilevare il livello di apprendimento conseguito nelle materie di italiano, matematica ed inglese da parte degli studenti a livello nazionale. Questo compito è stato affidato all'INVALSI che tratterà i tuoi dati nel rispetto di quanto stabilito dalla normativa sulla protezione dei dati (Regolamento UE n. 2016/679 detto anche GDPR). Puoi trovare tutte le informazioni sul trattamento dei tuoi dati sul sito dell'INVALSI, nella sezione Privacy.

## ISTRUZIONI

Troverai nel fascicolo 34 domande di matematica. La maggior parte delle domande ha quattro possibili risposte, ma una sola è quella giusta. Prima di ogni risposta c'è un quadratino con una lettera dell'alfabeto: A, B, C, D.

Per rispondere, devi mettere una crocetta nel quadratino accanto alla risposta (una sola) che ritieni giusta, come nell'esempio seguente.

### Esempio 1

**Quanti giorni ci sono in una settimana?**

- A.  Sette
- B.  Sei
- C.  Cinque
- D.  Quattro

Se ti accorgi di aver sbagliato, puoi correggere: devi scrivere **NO** accanto alla risposta sbagliata e mettere una crocetta nel quadratino accanto alla risposta che ritieni giusta, come nell'esempio seguente.

### Esempio 2

**Quanti minuti ci sono in un'ora?**

- NO**
- A.  30
  - B.  50
  - C.  60
  - D.  100

In alcuni casi le domande chiedono di scrivere la risposta o il procedimento, oppure prevedono una diversa modalità di risposta. In questo caso il testo della domanda ti dice come rispondere. Leggilo dunque sempre con molta attenzione.

Puoi usare il righello, la squadra e il goniometro ma non la calcolatrice.

Non scrivere con la matita, ma usa soltanto una penna nera o blu.

Ricordati che puoi disegnare o scrivere sulle figure e puoi usare gli spazi bianchi del fascicolo per fare calcoli, se ti serve.

**Per fare una prova, ora rispondi a questa domanda.**

**In quale delle seguenti sequenze i numeri sono scritti dal più piccolo al più grande?**

A.  2; 5; 4; 8

B.  8; 5; 4; 2

C.  2; 4; 8; 5

D.  2; 4; 5; 8

Hai a disposizione un'ora e quindici minuti (75 minuti) per rispondere alle domande. L'insegnante ti dirà quando cominciare a lavorare. Quando l'insegnante ti comunicherà che il tempo è finito, posa la penna e chiudi il fascicolo.

Se finisci prima, puoi chiudere il fascicolo e aspettare la fine, oppure puoi controllare le risposte che hai dato.

**NON GIRARE LA PAGINA  
FINCHÉ NON TI SARÀ DETTO DI FARLO**

**D1. Leonardo da Vinci è morto nel 1519 a 67 anni.**

**In quale anno è nato Leonardo da Vinci?**

**Risposta: .....**

**D2. Hai a disposizione tre sacchetti e delle biglie di questi colori:**

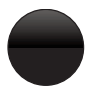

biglia nera

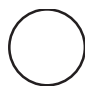

biglia bianca

**Disegna in ciascun sacchetto le biglie necessarie per rendere vere le affermazioni scritte nei cartellini. Si può estrarre, senza guardare, solo una biglia da ogni sacchetto.**

**È certo estrarre  
una biglia bianca**

**È impossibile estrarre  
una biglia bianca**

**È meno probabile estrarre  
una biglia bianca  
che una biglia nera**

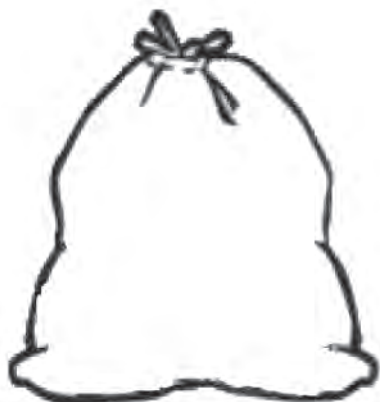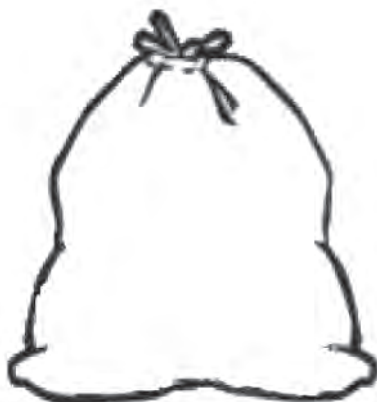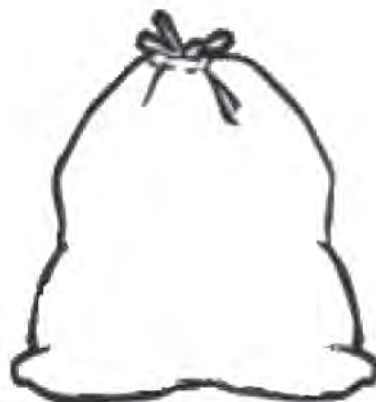

**D3. Osserva il piano cartesiano.**

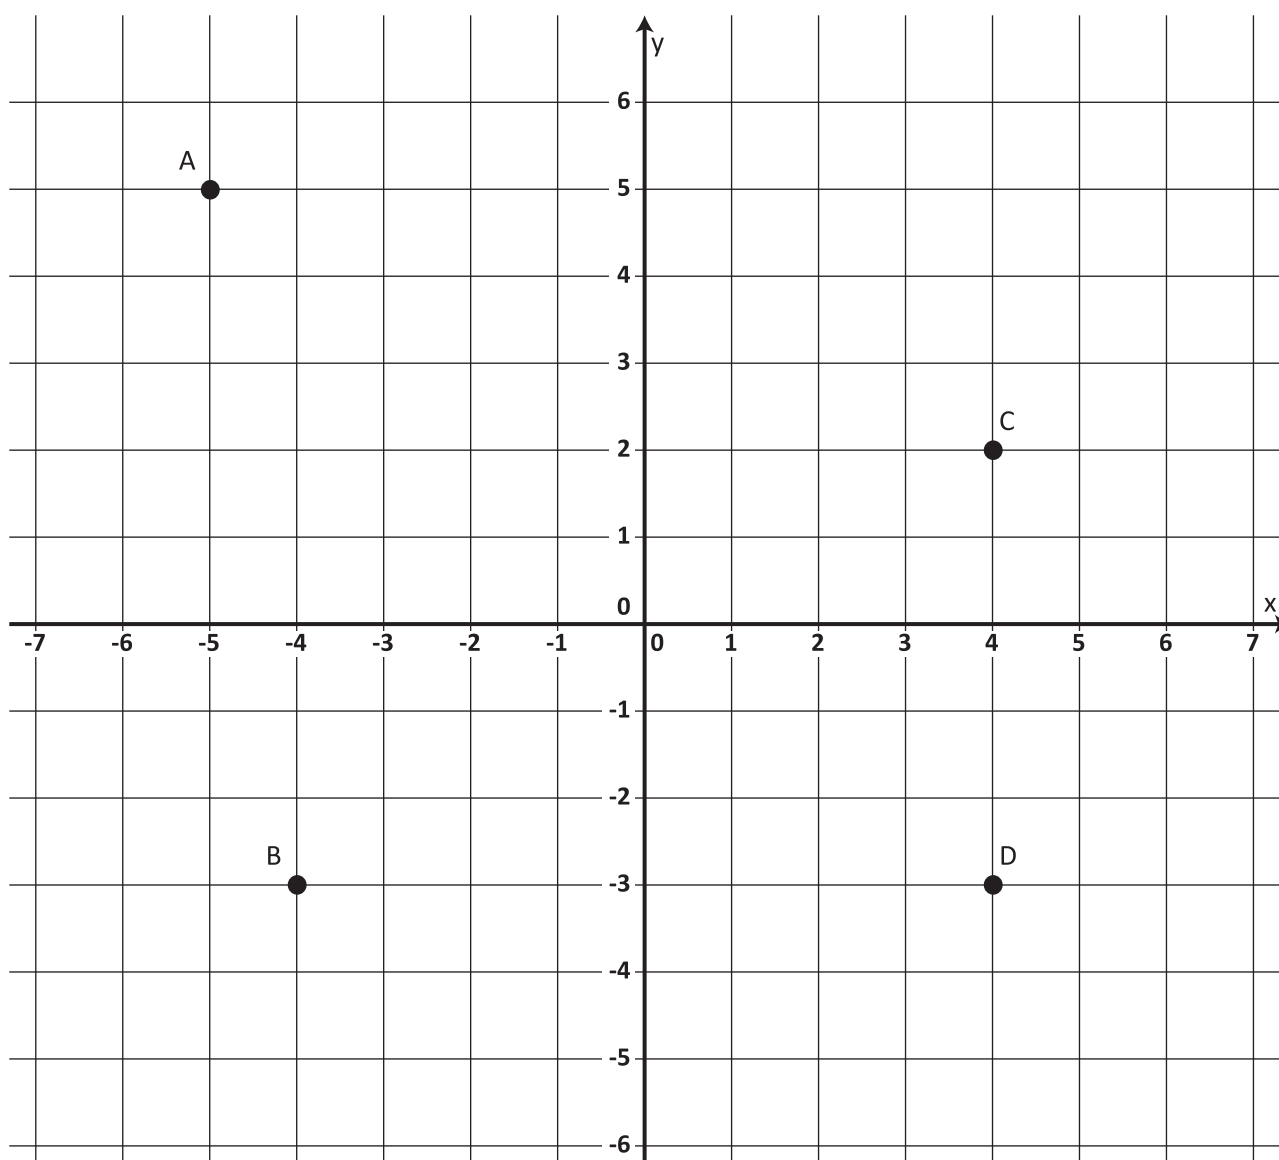

a.  $(-4 ; -3)$  sono le coordinate del punto .....

b. Il punto C ha coordinate (.....; .....

- D4. Per indicare la dimensione dello schermo di un televisore si utilizza la lunghezza della diagonale misurata in pollici. Il pollice è un'unità di misura che si può convertire in centimetri.

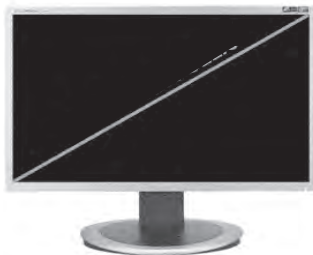

Completa la tabella scegliendo tra queste misure quella corretta.

65 pollici

80 pollici

90 pollici

127 pollici

| MISURA DELLA<br>DIAGONALE<br>(pollici) | MISURA DELLA<br>DIAGONALE<br>(centimetri) |
|----------------------------------------|-------------------------------------------|
| 40 pollici                             | 101,6 cm                                  |
| .....                                  | 228,6 cm                                  |

- D5. Le frazioni  $\frac{3}{8}$  e  $\frac{15}{40}$  sono equivalenti?

Nella tabella che segue indica la sola argomentazione che giustifica la risposta corretta.

| No, perché ... |                                                                     | Sì, perché ... |                                                                                                                                    |
|----------------|---------------------------------------------------------------------|----------------|------------------------------------------------------------------------------------------------------------------------------------|
| A.             | <input type="checkbox"/> i numeratori e i denominatori sono diversi | C.             | <input type="checkbox"/> sia nella prima frazione sia nella seconda frazione il numeratore è minore del denominatore               |
| B.             | <input type="checkbox"/> 3 è minore di 15 e 8 è minore di 40        | D.             | <input type="checkbox"/> se si moltiplicano per 5 sia il numeratore sia il denominatore della prima frazione si ottiene la seconda |



- D6. Completa la figura in modo da ottenere un pentagono.  
Tre lati sono già stati disegnati.

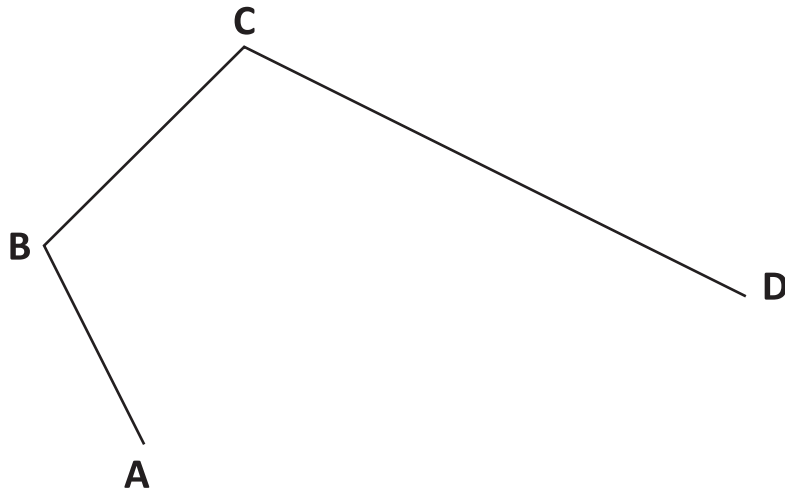

- D7. L'immagine riproduce la piantina in scala di una camera da letto lunga 5,2 m e larga 4,5 m.

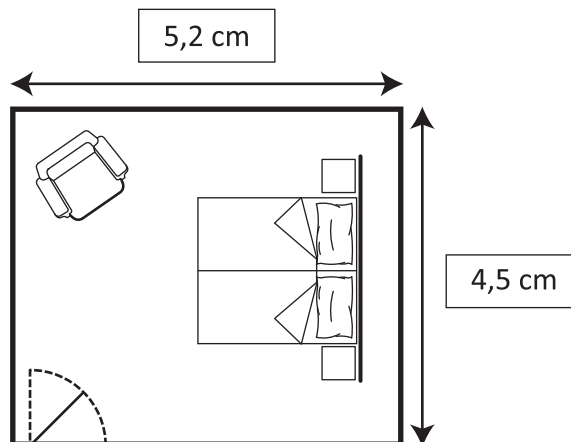

Quale scala di riduzione è stata usata per disegnare la piantina?

- A.  1 : 1  
 B.  1 : 10  
 C.  1 : 100  
 D.  1 : 1000

**D8. Il grafico rappresenta le temperature registrate in una settimana di novembre alle ore 8 a Bolzano.**

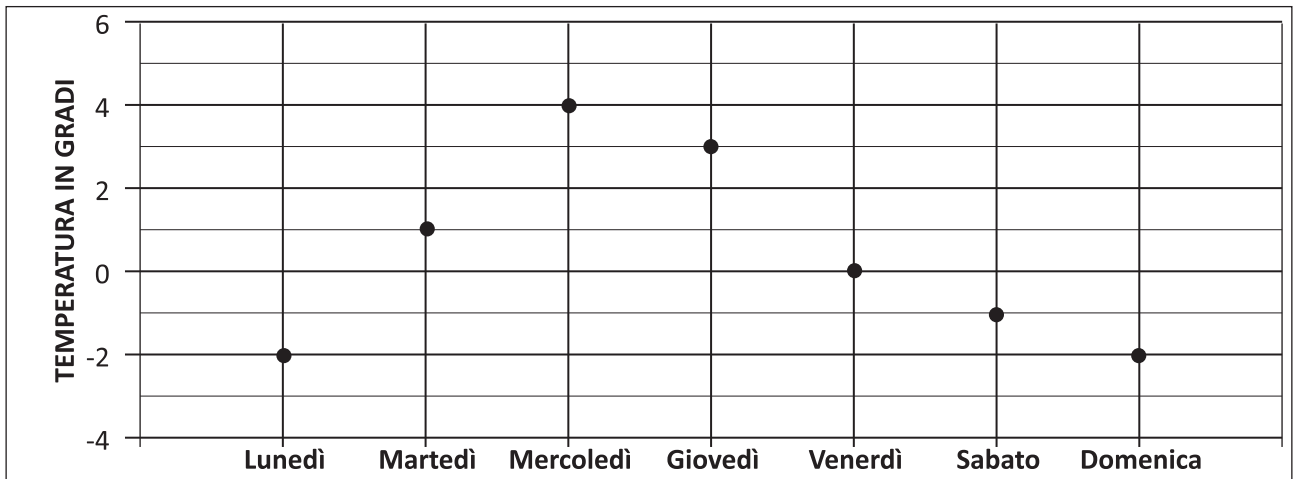

a. **Quale temperatura è stata registrata più volte?**

Risposta: .....gradi

b. **Qual è la differenza di temperatura tra martedì e domenica?**

Risposta: ..... gradi

c. **Osserva sul grafico le temperature registrate da martedì a venerdì.**

**Qual è la media di queste quattro temperature?**

Risposta: ..... gradi

**D9. Osserva questa retta dei numeri.**

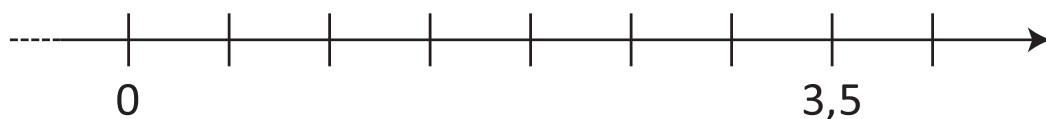

**Scrivi il numero 2 al posto giusto sulla retta dei numeri.**

D10. Osserva la seguente figura.

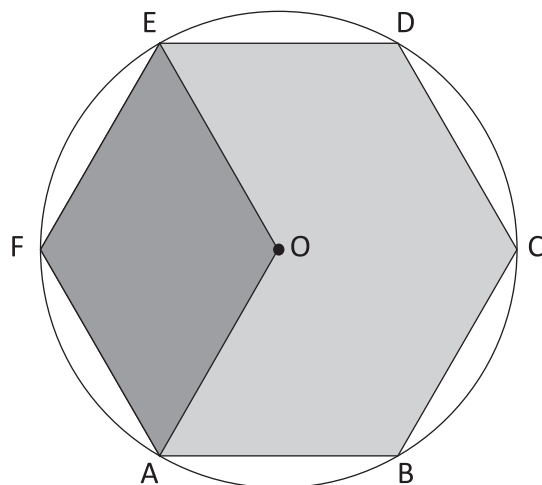

L'area dell'esagono regolare ABCDEF è  $30 \text{ cm}^2$ .

Il punto O è il centro dell'esagono.

Qual è l'area del rombo AOE?

- A.   $5 \text{ cm}^2$
- B.   $10 \text{ cm}^2$
- C.   $15 \text{ cm}^2$
- D.   $20 \text{ cm}^2$

D11. Qual è il numero minimo di confezioni necessarie per avere un litro di ciascun prodotto?

Completa la tabella.

|                                 |                                                                                                          |                                                                                                       |                                                                                                          |
|---------------------------------|----------------------------------------------------------------------------------------------------------|-------------------------------------------------------------------------------------------------------|----------------------------------------------------------------------------------------------------------|
| Confezione                      | <br>PROFUMO<br>100 mL | <br>LATTE<br>1/2 L | <br>PANNA<br>250 mL |
| Numero di confezioni necessarie | 10                                                                                                       | .....                                                                                                 | .....                                                                                                    |

**D12. Questo grafico rappresenta la percentuale di popolazione che ha utilizzato internet nel 2005 e nel 2015 nei cinque continenti.**

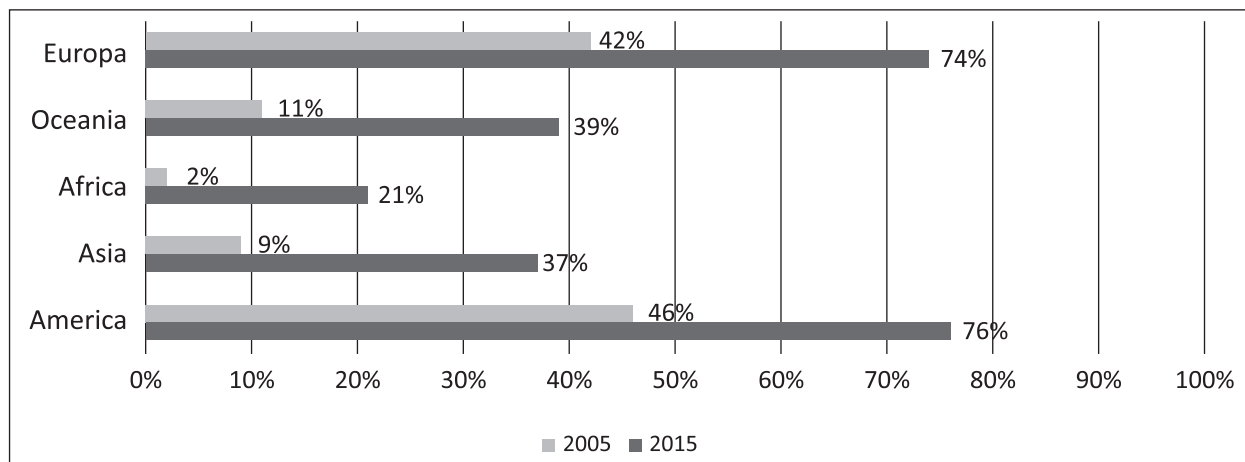

**Sulla base dei dati riportati nel grafico, completa le seguenti frasi.**

- Nel 2005 la percentuale della popolazione che in Asia utilizzava internet era pari al .....%.
- Nel 2015 la percentuale della popolazione che utilizzava internet in ..... era esattamente la metà della percentuale della popolazione che nel 2005 lo utilizzava in Europa.
- Nel 2015, tra i cinque continenti, in ..... c'era la più alta percentuale di popolazione che utilizzava internet.

M1905D1300

**D13. Per preparare la crema di ricotta occorre mescolare  $\frac{2}{3}$  di ricotta e  $\frac{1}{3}$  di zucchero.**

**Il nonno usa 300 grammi di ricotta per preparare la crema. Quanti grammi di zucchero gli occorrono?**

- 100 grammi
- 150 grammi
- 200 grammi
- 250 grammi

**D14. Osserva il poligono grigio. Due lati sono paralleli.**

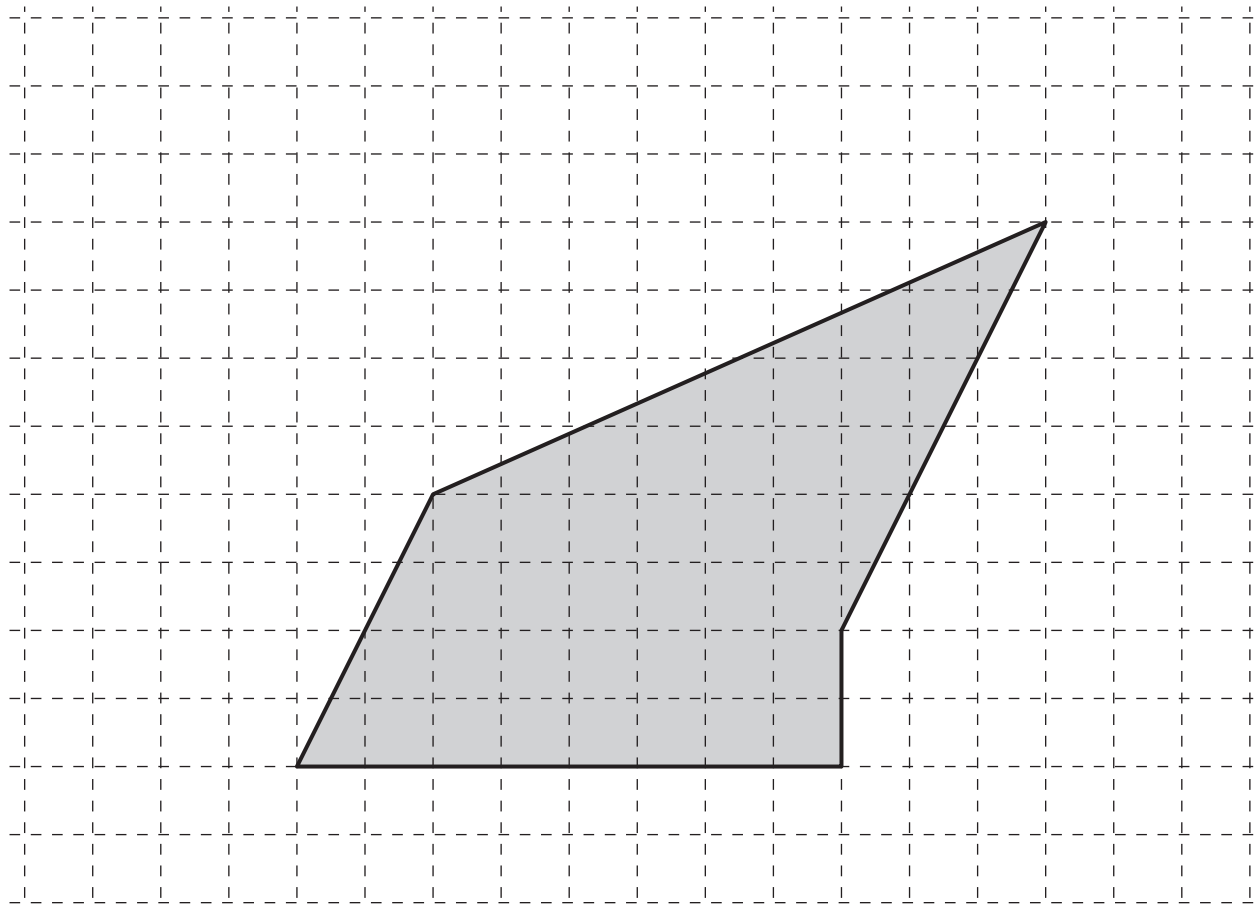

**Segna con una crocetta i due lati paralleli.**

**D15. Il 15 gennaio 2015 a Montevoglio, alle 8 del mattino, la temperatura era di 5 gradi.**

**Il giorno dopo, alla stessa ora, la temperatura era diminuita di 7 gradi.**

**Qual era la temperatura a Montevoglio il 16 gennaio 2015 alle 8 del mattino?**

**Risposta:** ..... gradi

D16. Osserva la seguente figura: è un quadrato composto da sette poligoni.

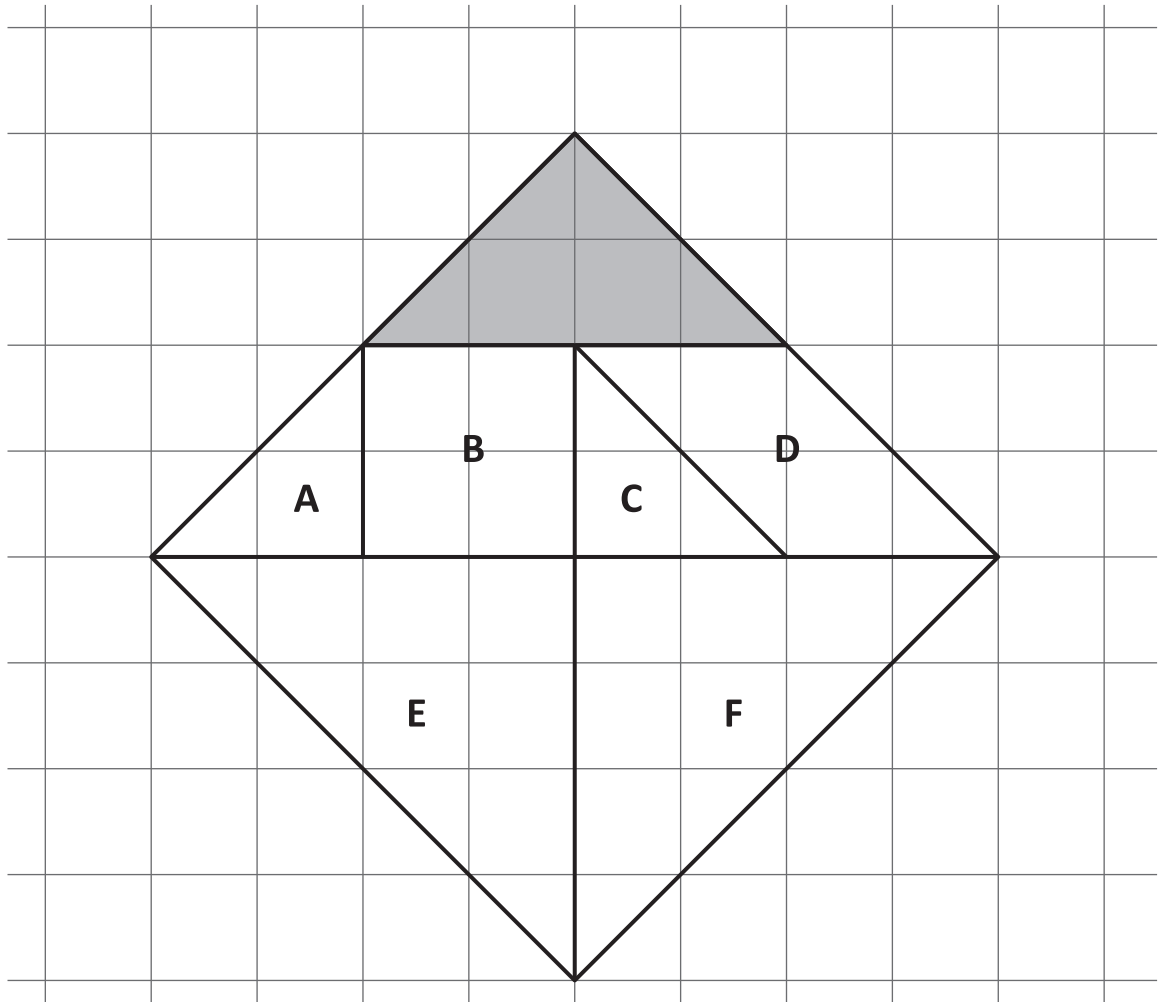

Segna con una crocetta i poligoni che hanno area uguale a quella del poligono grigio.

D17. Inserisci un numero al posto dei puntini in modo che l'uguaglianza sia vera.

$$\dots\dots \times 8 = 3,2$$

**D18. Domenico una volta all'anno va dal pediatra che misura la sua altezza.**

| Altezza di Domenico |           |           |           |           |           |           |           |           |           |            |            |
|---------------------|-----------|-----------|-----------|-----------|-----------|-----------|-----------|-----------|-----------|------------|------------|
| 0<br>anni           | 1<br>anno | 2<br>anni | 3<br>anni | 4<br>anni | 5<br>anni | 6<br>anni | 7<br>anni | 8<br>anni | 9<br>anni | 10<br>anni | 11<br>anni |
| 55 cm               | 78 cm     | 92 cm     | 100 cm    | 109 cm    | 115 cm    | 123 cm    | 130 cm    | 132 cm    | 136 cm    | 140 cm     | 145 cm     |

**Nel grafico sono riportate alcune altezze.**

**Completa il grafico con le tre altezze mancanti.**

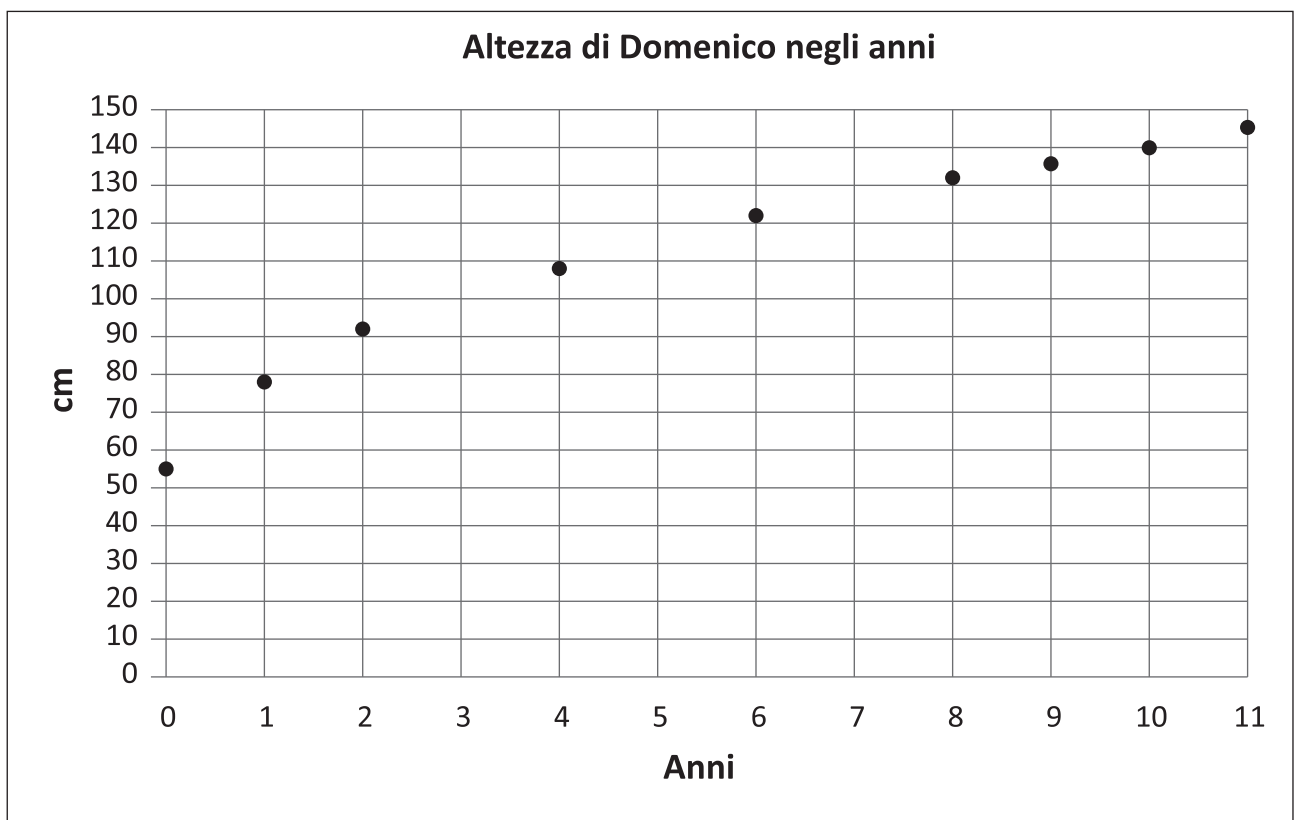

**D19. Laura dice:**

“Se moltiplichi per 2 un numero naturale e dal risultato sottrai 1, ottieni sempre un numero pari”.

Laura ha ragione?

Sì, Laura ha ragione perché .....

.....

.....

No, Laura non ha ragione perché .....

.....

.....

**D20. A uno spettacolo teatrale sono presenti 96 spettatori.**

Gli uomini sono 16 più delle donne.

Osserva la rappresentazione grafica della situazione.

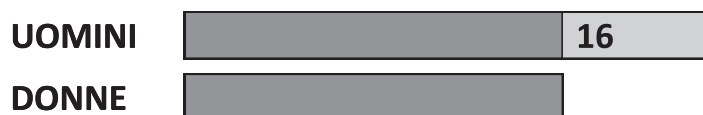

Quante sono le donne?

A.  32

B.  40

C.  56

D.  80



**D21.** Osserva la figura in cui sono rappresentate sei bandierine con le aste che si incontrano tutte nel punto O. Gli angoli compresi tra due aste consecutive hanno tutti la stessa ampiezza.

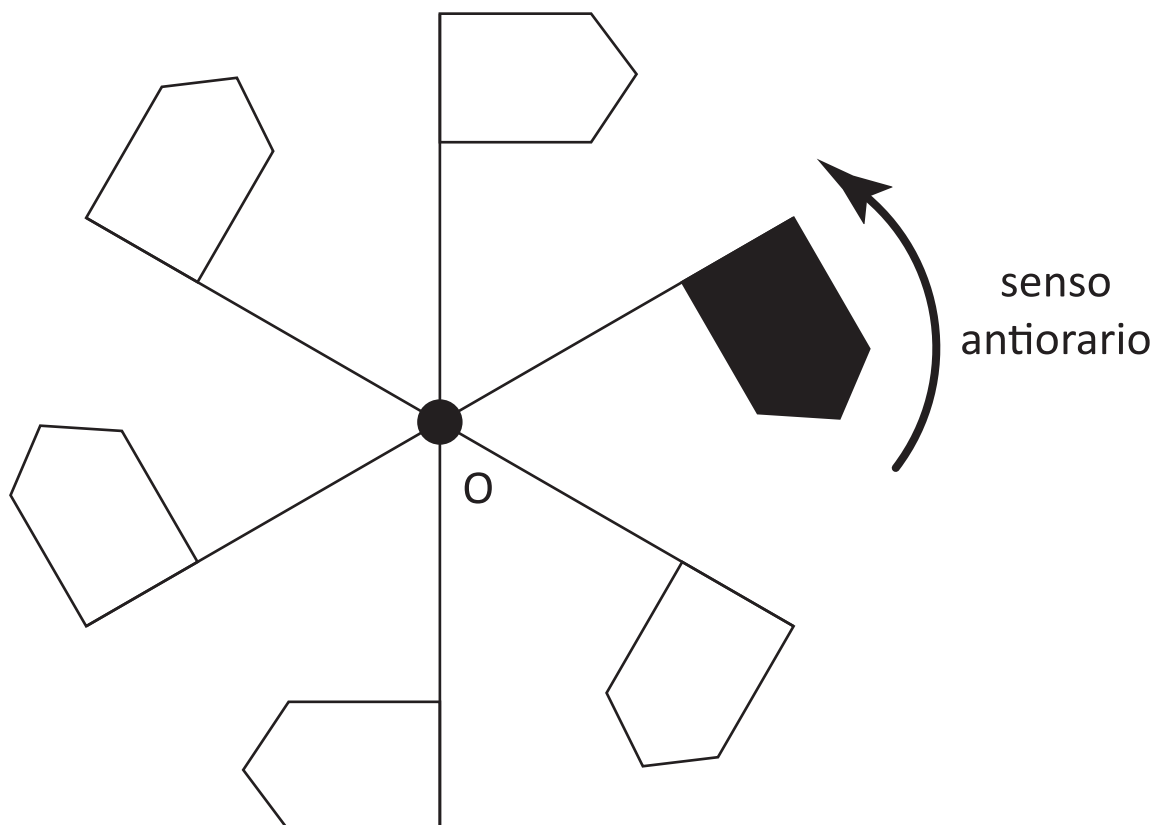

Segna con una crocetta la bandierina che si trova a  $120^\circ$  in senso antiorario da quella colorata di nero.

**D22.** In una classe c'è una femmina ogni due maschi.

La classe è formata da 18 alunni in totale.

Quante sono le femmine?

Risposta: .....

D23. Nel grafico è rappresentata l'altezza di una piantina misurata in tre momenti diversi a distanza di una settimana uno dall'altro.

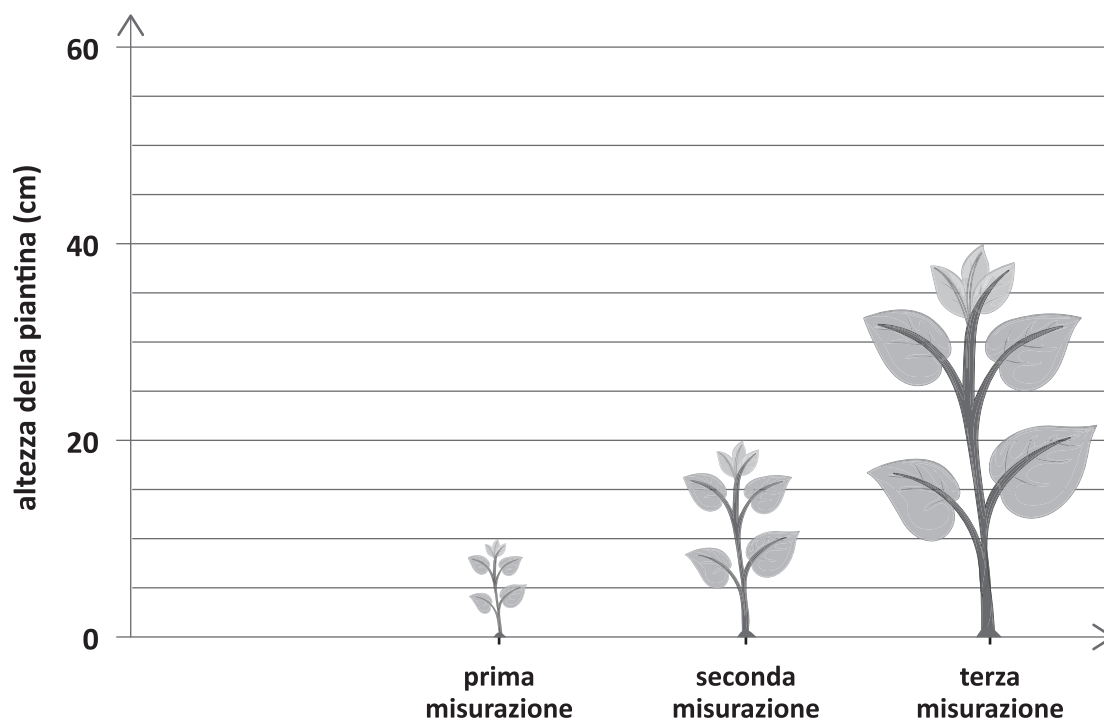

Di quanto è cresciuta in altezza la piantina tra la prima e la seconda misurazione?

Risposta: ..... cm

D24. Quale delle seguenti espressioni non dà lo stesso risultato di  $316 \times 8$ ?

- A.   $316 \times 9 - 316$
- B.   $316 \times 7 + 316$
- C.   $315 \times 8 + 8$
- D.   $315 \times 8 + 1$

**D25. Completa le seguenti frasi inserendo nelle caselle le unità di misura scritte qui sotto.**

|    |   |    |    |
|----|---|----|----|
| km | m | cm | mm |
|----|---|----|----|

**Puoi usare più volte la stessa unità di misura.**

- a. La larghezza del banco è di circa 50
- b. L'altezza del monte Cimone è di circa 2165
- c. La lunghezza del corridoio della scuola è di circa 20
- d. Il tratto di strada che in un'ora possiamo percorrere camminando è di circa 3
- e. Lo spessore di un foglio di cartoncino è di circa 0,5

M1905D2600

**D26. Osserva la figura.**

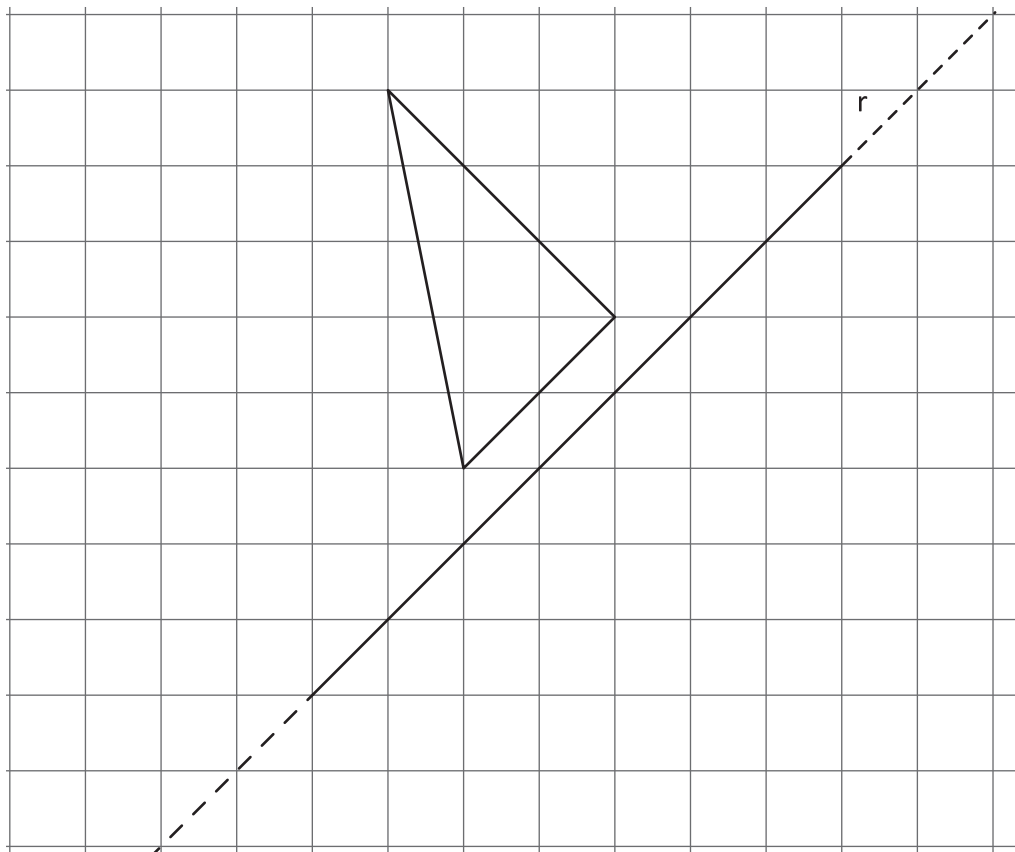

**Disegna il triangolo simmetrico di quello dato rispetto alla retta r.**

**D27.** Il falegname Gino costruisce tavoli di diverse misure usando pannelli di legno quadrati delle stesse dimensioni e li rifinisce con cornici tutte dello stesso spessore.

Questi sono i diversi modelli costruiti da Gino.

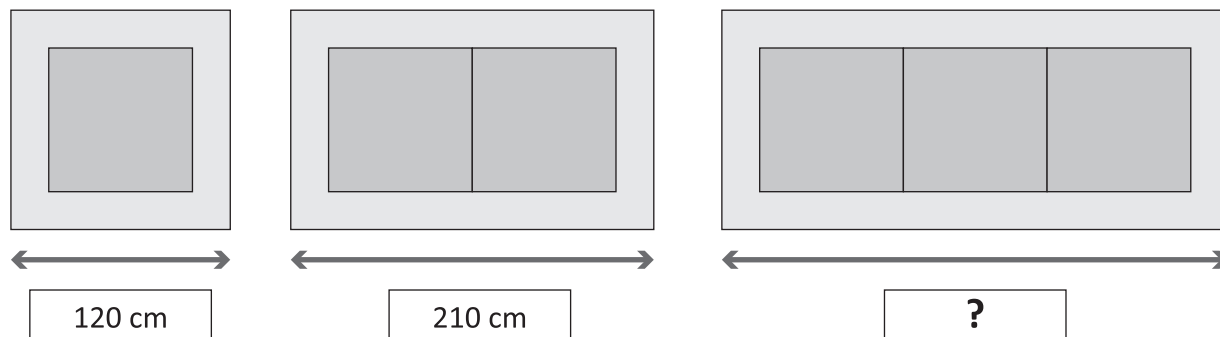

**Quanto è lungo il tavolo più grande?**

- A.  270 cm
- B.  300 cm
- C.  330 cm
- D.  360 cm

**D28.** Luca lancia due dadi a sei facce non truccati.

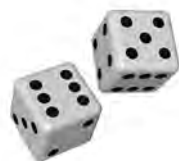

Completa la frase inserendo una delle seguenti espressioni:

**MAGGIORE DELLA**

**MINORE DELLA**

**UGUALE ALLA**

La probabilità che la somma dei punti sui due dadi sia 12 è .....  
 probabilità che la somma sia 2.

**D29. Questo contenitore ha la forma di un tronco di cono ed è appoggiato al piano sulla base minore.**

**Come vedi in figura, il liquido al suo interno arriva a un'altezza di 5 cm.**

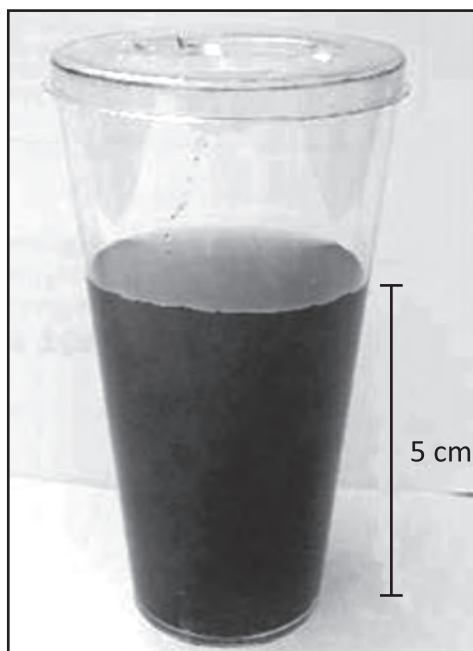

**Se chiudo il contenitore e poi lo capovolgo appoggiandolo al piano sulla base maggiore, il liquido al suo interno**

- A.  arriverà a 5 cm di altezza perché la quantità di liquido all'interno del contenitore è sempre la stessa
- B.  arriverà a più di 5 cm di altezza perché la base di appoggio ora è più grande e la quantità di liquido è sempre la stessa
- C.  arriverà a meno di 5 cm di altezza perché la base di appoggio ora è più grande e la quantità di liquido è sempre la stessa
- D.  arriverà a meno di 5 cm di altezza perché la quantità di liquido nel contenitore è minore dopo il capovolgimento

**D30. Osserva la figura formata da rettangoli di diverse dimensioni.**

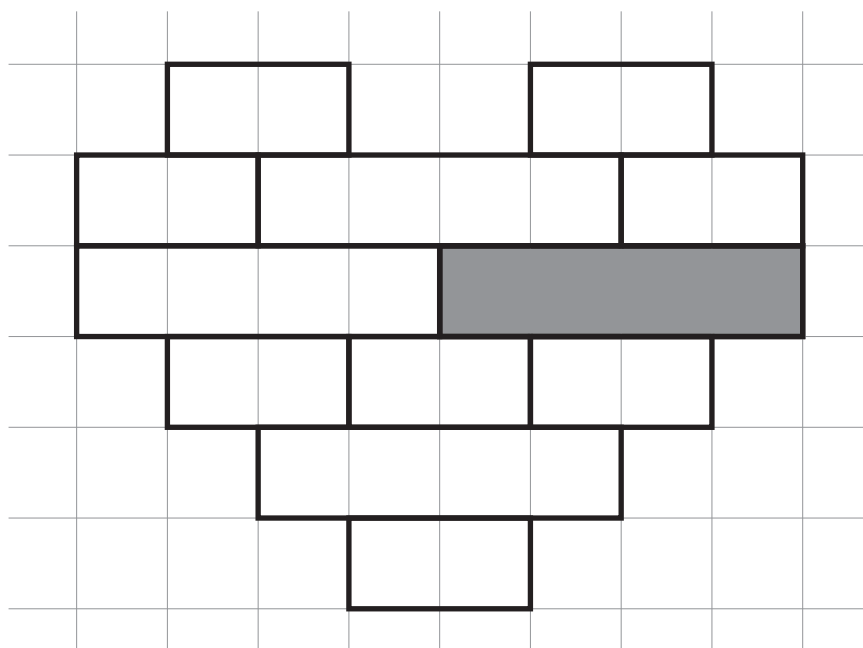

**Completa la frase scrivendo al posto dei puntini una delle due parole che vedi sotto la riga dei puntini.**

**Se tolgo il rettangolo grigio dalla figura, l'area della figura .....  
(aumenta/diminuisce)**

**e il perimetro .....  
(aumenta/diminuisce)**

**D31. Domenico, Lucia e Davide hanno giocato a turno a un gioco elettronico complessivamente per un'ora e un quarto di tempo.**

**Hanno giocato tutti e tre per la stessa quantità di tempo.**

**Per quanti minuti ha giocato ciascun bambino?**

**Risposta: ..... minuti**

**D32. Nel seguente grafico sono rappresentati i dati relativi al numero di alberi piantati e al numero di alberi abbattuti in un bosco dal 2011 al 2015.**

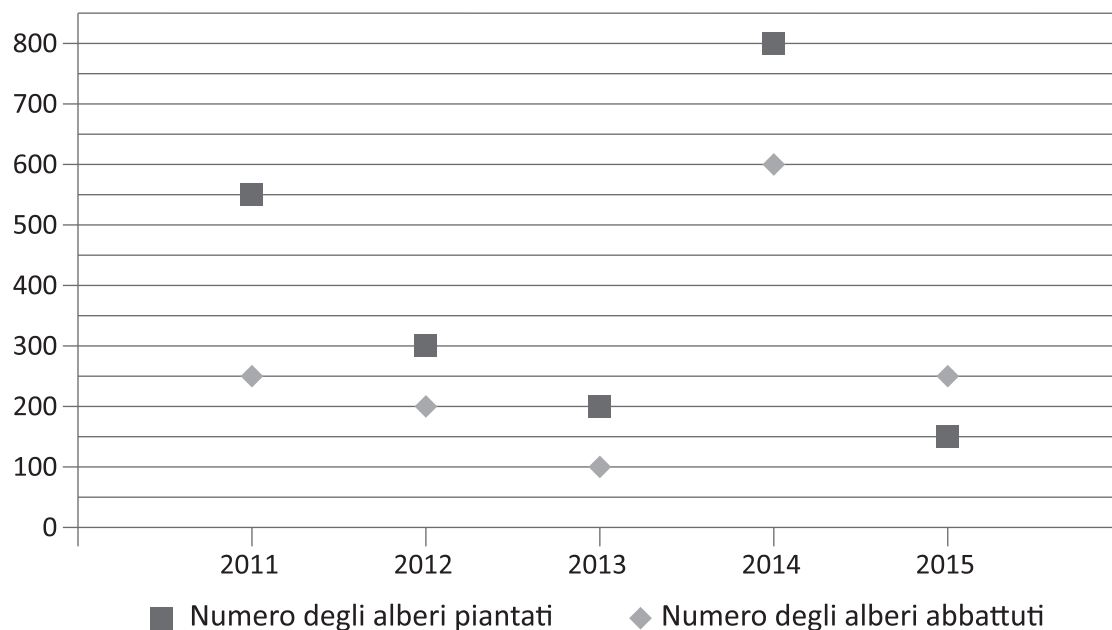

**Sulla base dei dati riportati nel grafico, indica con una crocetta se ciascuna delle seguenti affermazioni è vera (V) o falsa (F).**

|    |                                                                                                                       | V                        | F                        |
|----|-----------------------------------------------------------------------------------------------------------------------|--------------------------|--------------------------|
| a. | Nel 2011 il numero di alberi abbattuti è 550                                                                          | <input type="checkbox"/> | <input type="checkbox"/> |
| b. | Nel 2013 il numero di alberi piantati è il doppio del numero di alberi abbattuti                                      | <input type="checkbox"/> | <input type="checkbox"/> |
| c. | Nel 2011 la differenza tra il numero di alberi piantati e il numero di alberi abbattuti è inferiore a quella del 2014 | <input type="checkbox"/> | <input type="checkbox"/> |

D33. Aggiungi dei cuori nel riquadro in modo che la frase scritta a fianco sia vera.

Il 50% delle figure sono cuori.

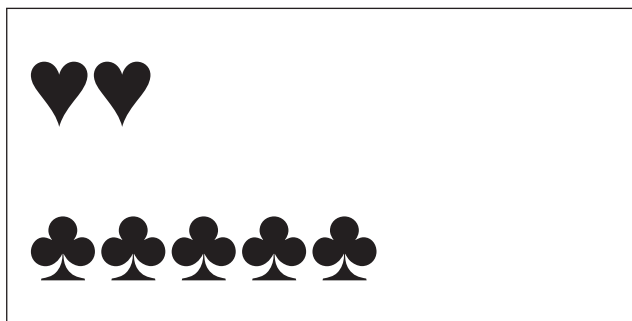

D34. Uno di questi solidi è formato da 3 rettangoli e 2 triangoli.

Quale?

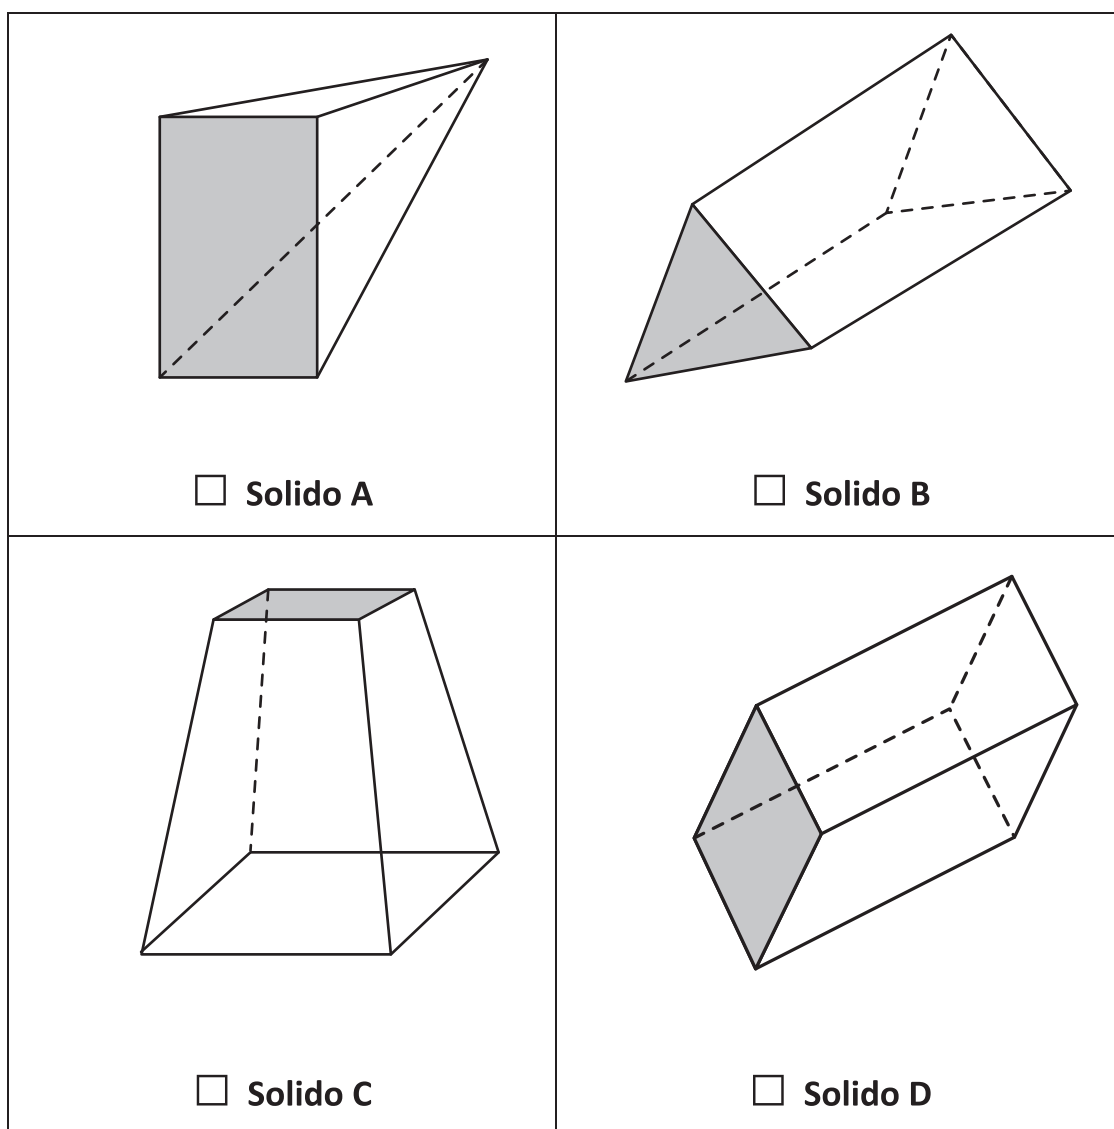



# QUESTIONARIO

## Istruzioni

In questo questionario troverai domande su di te.

Hai a disposizione 10 minuti per rispondere. Se finisci prima, consegna il fascicolo compilato e resta seduto/a al tuo posto.

### Q1. Qual è stato, alla fine dello scorso anno scolastico, il tuo voto in Matematica?

Metti una crocetta su un solo quadratino.

|                                       |                                       |                                       |                                       |                                       |                                       |
|---------------------------------------|---------------------------------------|---------------------------------------|---------------------------------------|---------------------------------------|---------------------------------------|
| 5 o meno di 5                         | 6                                     | 7                                     | 8                                     | 9                                     | 10                                    |
| <input type="checkbox"/> <sub>1</sub> | <input type="checkbox"/> <sub>2</sub> | <input type="checkbox"/> <sub>3</sub> | <input type="checkbox"/> <sub>4</sub> | <input type="checkbox"/> <sub>5</sub> | <input type="checkbox"/> <sub>6</sub> |

### Q2. A casa, quale lingua parli la maggior parte del tempo?

Metti una crocetta su un solo quadratino.

|             |                                       |                                          |                                        |
|-------------|---------------------------------------|------------------------------------------|----------------------------------------|
| A. Italiano | <input type="checkbox"/> <sub>1</sub> | I. Inglese                               | <input type="checkbox"/> <sub>9</sub>  |
| B. Albanese | <input type="checkbox"/> <sub>2</sub> | J. Ladino                                | <input type="checkbox"/> <sub>10</sub> |
| C. Arabo    | <input type="checkbox"/> <sub>3</sub> | K. Portoghese                            | <input type="checkbox"/> <sub>11</sub> |
| D. Cinese   | <input type="checkbox"/> <sub>4</sub> | L. Romeno                                | <input type="checkbox"/> <sub>12</sub> |
| E. Croato   | <input type="checkbox"/> <sub>5</sub> | M. Sloveno                               | <input type="checkbox"/> <sub>13</sub> |
| F. Francese | <input type="checkbox"/> <sub>6</sub> | N. Spagnolo                              | <input type="checkbox"/> <sub>14</sub> |
| G. Greco    | <input type="checkbox"/> <sub>7</sub> | O. Tedesco                               | <input type="checkbox"/> <sub>15</sub> |
| H. Indi     | <input type="checkbox"/> <sub>8</sub> | P. Una lingua diversa da quelle elencate | <input type="checkbox"/> <sub>16</sub> |

**Q3. Oltre alla lingua indicata sopra, a casa parli frequentemente anche un dialetto (siciliano, veneto, ecc.)?**

*Metti una crocetta su un solo quadratino.*

Sì

No

<sub>1</sub>

<sub>2</sub>

**Q4. A casa hai:**

*Metti una crocetta su un solo quadratino per ogni riga.*

*Sì*

*No*

A. un posto tranquillo per studiare

<sub>1</sub>

<sub>2</sub>

B. un computer che puoi usare per lo studio

<sub>1</sub>

<sub>2</sub>

C. una scrivania per fare i compiti

<sub>1</sub>

<sub>2</sub>

D. enciclopedie (composte da libri oppure da CD-ROM o DVD)

<sub>1</sub>

<sub>2</sub>

E. un collegamento a internet

<sub>1</sub>

<sub>2</sub>

F. una cameretta tutta tua

<sub>1</sub>

<sub>2</sub>

**Q5. Quanti libri ci sono all'incirca a casa tua (esclusi i libri di scuola)?**

Metti una crocetta su un solo quadratino.

A. Nessuno o pochissimi (0-10 libri)

Spazio occupato da 10 libri

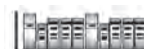

B. Abbastanza da riempire una mensola (11-25 libri)

Spazio occupato da 25 libri

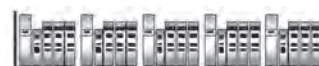

C. Abbastanza da riempire uno scaffale (26-100 libri)

Spazio occupato da 100 libri

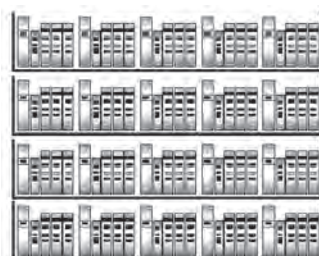

D. Abbastanza da riempire due scaffali (101-200 libri)

Spazio occupato da 200 libri

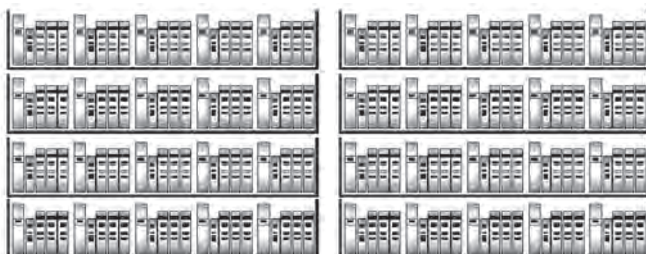

E. Abbastanza da riempire tre o più scaffali (più di 200 libri)

Spazio occupato da più di 200 libri

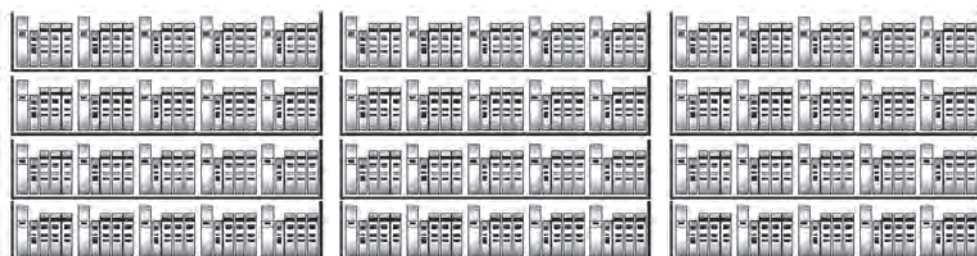









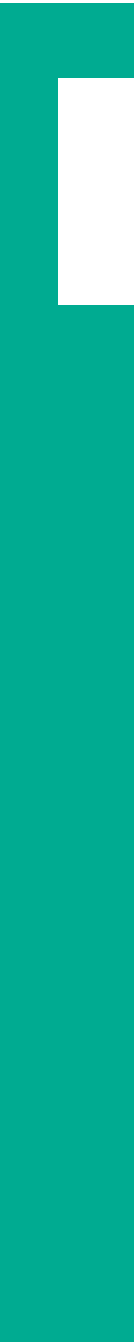

Supplement: s1 [file s1]
