# Supplementary material
Source: MDPI journal article supplement (https://www.mdpi.com/2624-8611/2/4/24)
Supplement: s1 [file s1]

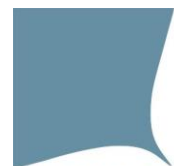

**Servizio Nazionale di Valutazione**  
**a.s. 2018/19**  
**Guida alla lettura**  
**Prova di Matematica**  
**Classe quinta – Scuola primaria**

I quesiti sono distribuiti negli ambiti secondo la tabella seguente:

| <b>Ambito</b>        | <b>Numero di domande</b> | <b>Numero di Item</b> |
|----------------------|--------------------------|-----------------------|
| Numeri               | 10                       | 10                    |
| Spazio figure        | 10                       | 11                    |
| Dati e previsioni    | 7                        | 11                    |
| Relazioni e funzioni | 7                        | 7                     |
| <b>Totale</b>        | <b>34</b>                | <b>39</b>             |

Gli item sono distribuiti nelle dimensioni secondo la tabella seguente:

| <b>Dimensione</b>  | <b>Numeri</b> | <b>Spazio e figure</b> | <b>Dati e previsioni</b> | <b>Relazioni e funzioni</b> | <b>TOTALE</b> |
|--------------------|---------------|------------------------|--------------------------|-----------------------------|---------------|
| Conoscere          | 6             | 9                      | 4                        | 4                           | 23            |
| Risolvere problemi | 2             | 1                      | 7                        | 2                           | 12            |
| Argomentare        | 2             | 1                      | 0                        | 1                           | 4             |
| <b>Totale</b>      | <b>10</b>     | <b>11</b>              | <b>11</b>                | <b>7</b>                    | <b>39</b>     |

**Tabella della suddivisione degli item in relazione ad ambiti e traguardi**

| Traguardi                                                                                                                                                                                                                                  | Ambiti    |               |                 |                    | TOT       |
|--------------------------------------------------------------------------------------------------------------------------------------------------------------------------------------------------------------------------------------------|-----------|---------------|-----------------|--------------------|-----------|
|                                                                                                                                                                                                                                            | Numeri    | Spazio figure | Dati Previsioni | Relazioni funzioni |           |
| 1. L'alunno si muove con sicurezza nel calcolo scritto e mentale con i numeri naturali e sa valutare l'opportunità di ricorrere a una calcolatrice.                                                                                        | 4         | 0             | 0               | 0                  | 4         |
| 2. Riconosce e rappresenta forme del piano e dello spazio, relazioni e strutture che si trovano in natura o che sono state create dall'uomo.                                                                                               | 0         | 4             | 0               | 0                  | 4         |
| 3. Descrive, denomina e classifica figure in base a caratteristiche geometriche, ne determina misure, progetta e costruisce modelli concreti di vario tipo.                                                                                | 1         | 7             | 0               | 0                  | 8         |
| 4. Utilizza strumenti per il disegno geometrico (riga, compasso, squadra) e i più comuni strumenti di misura (metro, goniometro...).                                                                                                       | 0         | 0             | 0               | 0                  | 0         |
| 5. Ricerca dati per ricavare informazioni e costruisce rappresentazioni (tabelle e grafici). Ricava informazioni anche da dati rappresentati in tabelle e grafici.                                                                         | 0         | 0             | 9               | 0                  | 9         |
| 6. Riconosce e quantifica, in casi semplici, situazioni di incertezza.                                                                                                                                                                     | 0         | 0             | 2               | 0                  | 2         |
| 7. Legge e comprende testi che coinvolgono aspetti logici e matematici.                                                                                                                                                                    | 1         | 0             | 0               | 1                  | 2         |
| 8. Riesce a risolvere facili problemi in tutti gli ambiti di contenuto, mantenendo il controllo sia sul processo risolutivo, sia sui risultati. Descrive il procedimento seguito e riconosce strategie di soluzione diverse dalla propria. | 1         | 0             | 0               | 2                  | 3         |
| 9. Costruisce ragionamenti formulando ipotesi, sostenendo le proprie idee e confrontandosi con il punto di vista di altri.                                                                                                                 | 1         | 0             | 0               | 0                  | 1         |
| 10. Riconosce e utilizza rappresentazioni diverse di oggetti matematici (numeri decimali, frazioni, percentuali, scale di riduzione, ...).                                                                                                 | 2         | 0             | 0               | 4                  | 6         |
| <b>TOTALE</b>                                                                                                                                                                                                                              | <b>10</b> | <b>11</b>     | <b>11</b>       | <b>7</b>           | <b>39</b> |

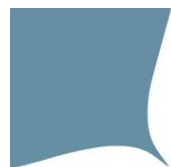

Di seguito viene proposta un'analisi dei quesiti utilizzando una tabella a tre colonne in cui vengono rispettivamente indicati:

- nella prima colonna il testo del quesito. La numerazione dei quesiti fa riferimento alla versione dei fascicoli che riporta in prima pagina “Fascicolo 1”.
- nella seconda colonna le caratteristiche. Esse si riferiscono al *Quadro di riferimento* delle prove SNV pubblicato sul sito INVALSI ([https://invalsi-areaprove.cineca.it/docs/file/QdR\\_MATEMATICA.pdf](https://invalsi-areaprove.cineca.it/docs/file/QdR_MATEMATICA.pdf)) e alle Indicazioni Nazionali per il curriculum della scuola dell'infanzia e del primo ciclo d'istruzione. Oltre all'Ambito prevalente e allo Scopo della domanda, ogni quesito appartiene a un raggruppamento di competenze (Dimensione) che si riferisce a una delle seguenti aree: Conoscere, Risolvere problemi, Argomentare. Tale raggruppamento deriva da esigenze connesse con l'analisi statistica degli esiti delle Prove INVALSI (e con la necessità didattica di avere un'ulteriore dimensione, trasversale ai contenuti di classificazione delle domande) e dall'esigenza di orientare nelle scuole la lettura dei risultati delle Prove in accordo con le Indicazioni Nazionali, in particolare con i Traguardi per lo sviluppo delle competenze riportati nel *Quadro di riferimento*. Ogni quesito viene quindi collegato a un Traguardo per lo sviluppo delle competenze e ogni Traguardo a una delle tre Dimensioni indicate. Alcuni tra i Traguardi indicati non vengono presi in esame in quanto non verificabili attraverso prove standardizzate.
- nella terza colonna una descrizione e un commento didattico; i possibili errori segnalati sono stati rilevati in sede di pretest e ovviamente non hanno alcuna pretesa di costituire una lista completa degli errori possibili e delle loro motivazioni.

È importante sottolineare che le caratteristiche proposte sono solo indicative e non devono rappresentare un vincolo per l'interpretazione del risultato: in matematica ogni domanda coinvolge spesso diversi ambiti, e la risposta richiede processi di diversa natura. Seguendo la prassi internazionale, si indicano l'ambito e la dimensione *prevalenti*, tenendo presente che spesso la scelta di una particolare opzione di risposta può indicare difficoltà o lacune in altri ambiti o in altre dimensioni.

A settembre verranno riportati nella seconda colonna (o nella terza per ragioni di impaginazione) i risultati ottenuti dal campione di scuole utilizzato per il Rapporto Nazionale. I risultati forniscono, oltre alla percentuale di risposte corrette o errate, anche la percentuale di risposte *manca*nti o *non valide*.

## GUIDA ALLA LETTURA

| Domanda                                                                                                                                             | Caratteristiche                                                                                                                                                                                                                                                                                                                                                                                                                                                                                                                                                                                                                                                                                                                                                                                                                                                                | Descrizione e commento |              |        |          |           |      |       |              |                                                                                                                                                                                                                                                                                                                                                                                                                                                                                                                                                                                                                          |
|-----------------------------------------------------------------------------------------------------------------------------------------------------|--------------------------------------------------------------------------------------------------------------------------------------------------------------------------------------------------------------------------------------------------------------------------------------------------------------------------------------------------------------------------------------------------------------------------------------------------------------------------------------------------------------------------------------------------------------------------------------------------------------------------------------------------------------------------------------------------------------------------------------------------------------------------------------------------------------------------------------------------------------------------------|------------------------|--------------|--------|----------|-----------|------|-------|--------------|--------------------------------------------------------------------------------------------------------------------------------------------------------------------------------------------------------------------------------------------------------------------------------------------------------------------------------------------------------------------------------------------------------------------------------------------------------------------------------------------------------------------------------------------------------------------------------------------------------------------------|
| <p><b>D1. Leonardo da Vinci è morto nel 1519 a 67 anni.</b></p> <p><b>In quale anno è nato Leonardo da Vinci?</b></p> <p><b>Risposta:</b> .....</p> | <p><b>AMBITO PREVALENTE</b><br/>Numeri</p> <p><b>SCOPO DELLA DOMANDA</b><br/>Individuare l'anno di nascita di una persona calcolando la differenza tra l'anno di morte e l'età a cui è morto.</p> <p><b>Indicazioni nazionali: TRAGUARDO</b><br/>L'alunno si muove con sicurezza nel calcolo scritto e mentale con i numeri naturali e sa valutare l'opportunità di ricorrere a una calcolatrice.</p> <p><b>Indicazioni nazionali: OBIETTIVO</b><br/><i>Eseguire le quattro operazioni con sicurezza, valutando l'opportunità di ricorrere al calcolo mentale, scritto o con la calcolatrice a seconda delle situazioni.</i></p> <p><b>DIMENSIONE</b><br/>Conoscere</p> <p><b>RISULTATI DEL CAMPIONE</b></p> <table><tr><th>Item</th><th>Mancante</th><th>Errata</th><th>Corretta</th></tr><tr><td><b>D1</b></td><td>3,7%</td><td>18,6%</td><td><b>77,7%</b></td></tr></table> | Item                   | Mancante     | Errata | Corretta | <b>D1</b> | 3,7% | 18,6% | <b>77,7%</b> | <p><b>Risposta corretta: 1452</b></p> <p>Il quesito richiede di interpretare le informazioni contenute nel testo di un problema verbale per ricavare l'anno di nascita di un personaggio storico conoscendone l'anno di morte e l'età a cui è morto. L'alunno può affrontare il quesito o svolgendo un'unica sottrazione (ossia 1519-67) o calcolando la differenza procedendo a ritroso dall'anno della morte. Possibili errori possono essere dovuti a calcoli sbagliati visto che la sottrazione prevede il "prestito", oppure al tipo di operazione utilizzata, ad esempio l'addizione invece della sottrazione.</p> |
| Item                                                                                                                                                | Mancante                                                                                                                                                                                                                                                                                                                                                                                                                                                                                                                                                                                                                                                                                                                                                                                                                                                                       | Errata                 | Corretta     |        |          |           |      |       |              |                                                                                                                                                                                                                                                                                                                                                                                                                                                                                                                                                                                                                          |
| <b>D1</b>                                                                                                                                           | 3,7%                                                                                                                                                                                                                                                                                                                                                                                                                                                                                                                                                                                                                                                                                                                                                                                                                                                                           | 18,6%                  | <b>77,7%</b> |        |          |           |      |       |              |                                                                                                                                                                                                                                                                                                                                                                                                                                                                                                                                                                                                                          |

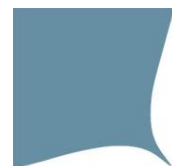

| Domanda                                                                                                                                                                                                                                                                                                                                                                                                                                                                                                                                                                                                                                                                                                                                                                                                                                                                                                                                                          | Caratteristiche                                                                                                                                                                                                                                                                                                                                                                                                                                                                                                                                                                                              | Descrizione e commento |          |        |          |    |      |       |       |                                                                                                                                                                                                                                                                                                                                                                                                                                                                                                                                                                                                                                                                                                                                                                                                                                         |
|------------------------------------------------------------------------------------------------------------------------------------------------------------------------------------------------------------------------------------------------------------------------------------------------------------------------------------------------------------------------------------------------------------------------------------------------------------------------------------------------------------------------------------------------------------------------------------------------------------------------------------------------------------------------------------------------------------------------------------------------------------------------------------------------------------------------------------------------------------------------------------------------------------------------------------------------------------------|--------------------------------------------------------------------------------------------------------------------------------------------------------------------------------------------------------------------------------------------------------------------------------------------------------------------------------------------------------------------------------------------------------------------------------------------------------------------------------------------------------------------------------------------------------------------------------------------------------------|------------------------|----------|--------|----------|----|------|-------|-------|-----------------------------------------------------------------------------------------------------------------------------------------------------------------------------------------------------------------------------------------------------------------------------------------------------------------------------------------------------------------------------------------------------------------------------------------------------------------------------------------------------------------------------------------------------------------------------------------------------------------------------------------------------------------------------------------------------------------------------------------------------------------------------------------------------------------------------------------|
| <p>D2. Hai a disposizione tre sacchetti e delle biglie di questi colori:</p> <div><div>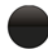<br/>biglia nera</div><div>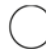<br/>biglia bianca</div></div> <p>Disegna in ciascun sacchetto le biglie necessarie per rendere vere le affermazioni scritte nei cartellini. Si può estrarre, senza guardare, solo una biglia da ogni sacchetto.</p> <div><div>È certo estrarre una biglia bianca</div><div>È impossibile estrarre una biglia bianca</div><div>È meno probabile estrarre una biglia bianca che una biglia nera</div></div> <div>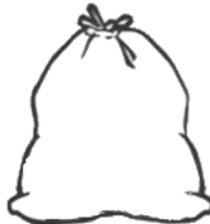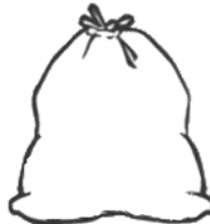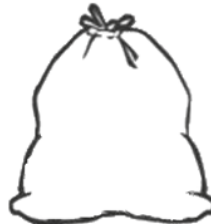</div> | <p><b>AMBITO PREVALENTE</b><br/>Dati e previsioni</p> <p><b>SCOPO DELLA DOMANDA</b><br/>Rappresentare, attraverso il completamento di un disegno, situazioni descritte a parole e che corrispondono a eventi con specifiche probabilità.</p> <p><b>Indicazioni nazionali: TRAGUARDO</b><br/>Riconosce e quantifica, in casi semplici, situazioni di incertezza.</p> <p><b>DIMENSIONE</b><br/>Risolvere problemi</p> <p><b>RISULTATI DEL CAMPIONE</b></p> <table><tr><th>Item</th><th>Mancante</th><th>Errata</th><th>Corretta</th></tr><tr><td>D2</td><td>2,8%</td><td>46,8%</td><td>50,4%</td></tr></table> | Item                   | Mancante | Errata | Corretta | D2 | 2,8% | 46,8% | 50,4% | <p><b>Risposta corretta:</b><br/>Nel primo sacchetto devono essere disegnate solo biglie bianche.<br/>Nel secondo non deve essere disegnata alcuna biglia bianca.<br/>Nel terzo le biglie bianche devono essere in numero inferiore alle biglie nere.</p> <p>Per rispondere al quesito si deve conoscere il significato delle espressioni “certo” “impossibile” e “probabile”. In particolare, il quesito richiede di:</p> <ul style="list-style-type: none"><li>a) rappresentare una situazione in cui tutte le biglie contenute nel sacchetto siano bianche;</li><li>b) rappresentare una situazione in cui nessuna biglia contenuta nel sacchetto sia bianca oppure il sacchetto sia vuoto;</li><li>c) rappresentare una situazione in cui nel sacchetto il numero di biglie bianche sia minore del numero di biglie nere.</li></ul> |
| Item                                                                                                                                                                                                                                                                                                                                                                                                                                                                                                                                                                                                                                                                                                                                                                                                                                                                                                                                                             | Mancante                                                                                                                                                                                                                                                                                                                                                                                                                                                                                                                                                                                                     | Errata                 | Corretta |        |          |    |      |       |       |                                                                                                                                                                                                                                                                                                                                                                                                                                                                                                                                                                                                                                                                                                                                                                                                                                         |
| D2                                                                                                                                                                                                                                                                                                                                                                                                                                                                                                                                                                                                                                                                                                                                                                                                                                                                                                                                                               | 2,8%                                                                                                                                                                                                                                                                                                                                                                                                                                                                                                                                                                                                         | 46,8%                  | 50,4%    |        |          |    |      |       |       |                                                                                                                                                                                                                                                                                                                                                                                                                                                                                                                                                                                                                                                                                                                                                                                                                                         |

| Domanda                                                                                                                                                                                                                                                                 | Caratteristiche                                                                                                                                                                                                                                                                                                                                                                                                                                                                                                                                                                                                                                                                                                                                                                                                                                                         | Descrizione e commento |          |        |          |     |      |       |       |     |      |       |       |                                                                                                                                                                                                                                                                                                                                                                                                                                                                                                                                                                                             |
|-------------------------------------------------------------------------------------------------------------------------------------------------------------------------------------------------------------------------------------------------------------------------|-------------------------------------------------------------------------------------------------------------------------------------------------------------------------------------------------------------------------------------------------------------------------------------------------------------------------------------------------------------------------------------------------------------------------------------------------------------------------------------------------------------------------------------------------------------------------------------------------------------------------------------------------------------------------------------------------------------------------------------------------------------------------------------------------------------------------------------------------------------------------|------------------------|----------|--------|----------|-----|------|-------|-------|-----|------|-------|-------|---------------------------------------------------------------------------------------------------------------------------------------------------------------------------------------------------------------------------------------------------------------------------------------------------------------------------------------------------------------------------------------------------------------------------------------------------------------------------------------------------------------------------------------------------------------------------------------------|
| <div>D3. Osserva il piano cartesiano.</div> <div>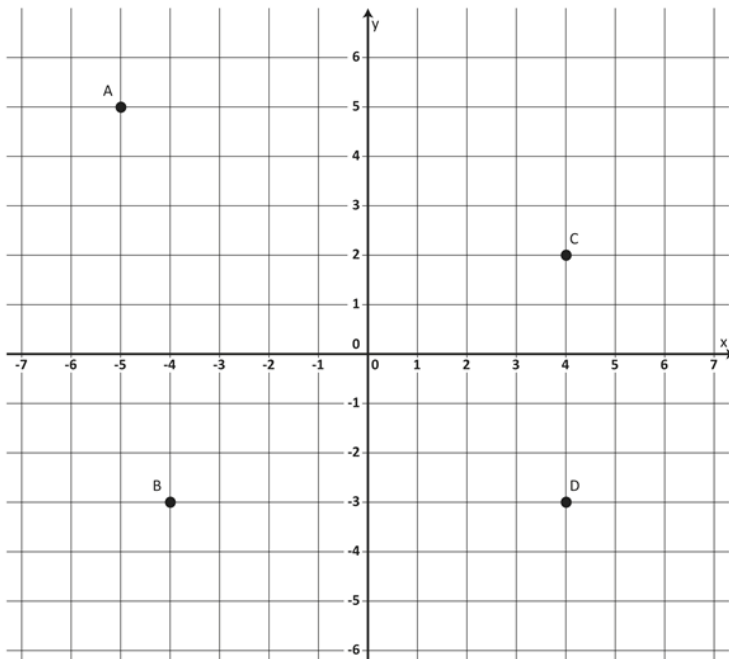</div> <div><div>a. <u>-4</u>; -3 sono le coordinate del punto .....</div><div>b. Il punto C ha coordinate (.....; .....)</div></div> | <div>AMBITO PREVALENTE</div> <div>Spazio figure</div> <div>SCOPO DELLA DOMANDA</div> <div>a. Identificare sul piano cartesiano il punto corrispondente a coordinate date.</div> <div>b. Individuare le coordinate di un punto sul piano cartesiano.</div> <div>Indicazioni nazionali: TRAGUARDO</div> <div>Riconosce e rappresenta forme del piano e dello spazio, relazioni e strutture che si trovano in natura o che sono state create dall'uomo.</div> <div>Indicazioni nazionali: OBIETTIVO</div> <div>Utilizzare il piano cartesiano per localizzare punti.</div> <div>DIMENSIONE</div> <div>Conoscere</div> <div>RISULTATI DEL CAMPIONE</div> <table><tr><th>Item</th><th>Mancante</th><th>Errata</th><th>Corretta</th></tr><tr><td>D3a</td><td>5,7%</td><td>13,2%</td><td>81,1%</td></tr><tr><td>D3b</td><td>2,4%</td><td>35,7%</td><td>61,9%</td></tr></table> | Item                   | Mancante | Errata | Corretta | D3a | 5,7% | 13,2% | 81,1% | D3b | 2,4% | 35,7% | 61,9% | <div>Risposta corretta: a. B    b. (4;2)</div> <div>L'item a. richiede l'identificazione di un punto sul piano cartesiano (scegliendo tra quattro punti già disegnati), date le sue coordinate. Un possibile errore potrebbe essere la scelta del punto D, anziché del punto B, se si considerano le coordinate (4; -3)</div> <div>L'item b., richiede l'individuazione delle coordinate di un punto disegnato sul piano cartesiano; un possibile errore potrebbe essere l'inversione tra il valore dell'ascissa e quello dell'ordinata che porterebbe alla risposta sbagliata (2;4).</div> |
| Item                                                                                                                                                                                                                                                                    | Mancante                                                                                                                                                                                                                                                                                                                                                                                                                                                                                                                                                                                                                                                                                                                                                                                                                                                                | Errata                 | Corretta |        |          |     |      |       |       |     |      |       |       |                                                                                                                                                                                                                                                                                                                                                                                                                                                                                                                                                                                             |
| D3a                                                                                                                                                                                                                                                                     | 5,7%                                                                                                                                                                                                                                                                                                                                                                                                                                                                                                                                                                                                                                                                                                                                                                                                                                                                    | 13,2%                  | 81,1%    |        |          |     |      |       |       |     |      |       |       |                                                                                                                                                                                                                                                                                                                                                                                                                                                                                                                                                                                             |
| D3b                                                                                                                                                                                                                                                                     | 2,4%                                                                                                                                                                                                                                                                                                                                                                                                                                                                                                                                                                                                                                                                                                                                                                                                                                                                    | 35,7%                  | 61,9%    |        |          |     |      |       |       |     |      |       |       |                                                                                                                                                                                                                                                                                                                                                                                                                                                                                                                                                                                             |



| Domanda                                                                                                                                                                                                                                                                                                                                                                                                                                                                                                                                                                                                                                                                           | Caratteristiche                     | Descrizione e commento              |            |          |       |          |                                                                                                                                                                                                                                                                                                                                                                                                                                                                                                                                                                                                                                                                                                                                                                  |      |          |        |          |    |      |       |       |                                                                                                                                                                                                                                                                                                                                                                                                                                                                                                                                                                                                                                                                                                                                                                                                                                                                           |
|-----------------------------------------------------------------------------------------------------------------------------------------------------------------------------------------------------------------------------------------------------------------------------------------------------------------------------------------------------------------------------------------------------------------------------------------------------------------------------------------------------------------------------------------------------------------------------------------------------------------------------------------------------------------------------------|-------------------------------------|-------------------------------------|------------|----------|-------|----------|------------------------------------------------------------------------------------------------------------------------------------------------------------------------------------------------------------------------------------------------------------------------------------------------------------------------------------------------------------------------------------------------------------------------------------------------------------------------------------------------------------------------------------------------------------------------------------------------------------------------------------------------------------------------------------------------------------------------------------------------------------------|------|----------|--------|----------|----|------|-------|-------|---------------------------------------------------------------------------------------------------------------------------------------------------------------------------------------------------------------------------------------------------------------------------------------------------------------------------------------------------------------------------------------------------------------------------------------------------------------------------------------------------------------------------------------------------------------------------------------------------------------------------------------------------------------------------------------------------------------------------------------------------------------------------------------------------------------------------------------------------------------------------|
| <p>D4. Per indicare la dimensione dello schermo di un televisore si utilizza la lunghezza della diagonale misurata in pollici. Il pollice è un'unità di misura che si può convertire in centimetri.</p> <div>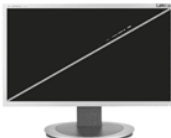</div> <p>Completa la tabella scegliendo tra queste misure quella corretta.</p> <div><div>65 pollici</div><div>80 pollici</div><div>90 pollici</div><div>127 pollici</div></div> <table><tr><td>MISURA DELLA DIAGONALE (pollici)</td><td>MISURA DELLA DIAGONALE (centimetri)</td></tr><tr><td>40 pollici</td><td>101,6 cm</td></tr><tr><td>.....</td><td>228,6 cm</td></tr></table> | MISURA DELLA DIAGONALE (pollici)    | MISURA DELLA DIAGONALE (centimetri) | 40 pollici | 101,6 cm | ..... | 228,6 cm | <p><b>AMBITO PREVALENTE</b><br/>Relazioni e funzioni</p> <p><b>SCOPO DELLA DOMANDA</b><br/>Individuare il valore di una misura effettuando una conversione tra unità di misura.</p> <p><b>Indicazioni nazionali: TRAGUARDO</b><br/>Riconosce e utilizza rappresentazioni diverse di oggetti matematici (numeri decimali, frazioni, percentuali, scale di riduzione, ...).</p> <p><b>Indicazioni nazionali: OBIETTIVO</b><br/><i>Utilizzare numeri decimali, frazioni e percentuali per descrivere situazioni quotidiane.</i></p> <p><b>DIMENSIONE</b><br/>Conoscere</p> <p><b>RISULTATI DEL CAMPIONE</b></p> <table><tr><th>Item</th><th>Mancante</th><th>Errata</th><th>Corretta</th></tr><tr><td>D4</td><td>3,2%</td><td>56,5%</td><td>40,3%</td></tr></table> | Item | Mancante | Errata | Corretta | D4 | 3,2% | 56,5% | 40,3% | <p><b>Risposta corretta: 90 pollici</b></p> <p>Il quesito richiede di operare una conversione tra unità di misura scegliendo, tra quattro valori di una misura in pollici, quello corrispondente a alla stessa misura espressa in centimetri. Per comprendere la relazione tra i dati viene fornito un esempio di conversione.</p> <p>Gli studenti potrebbero risolvere il problema mediante un ragionamento proporzionale e stime dei valori, piuttosto che per calcoli esatti. Infatti se 40 pollici corrispondono a circa 100 cm, 80 pollici corrispondono a circa 200 e 127 pollici a poco più di 300, quindi l'unica misura possibile da inserire è 90 pollici. Oppure lo studente può, sempre con una stima, calcolare il valore di un pollice in centimetri (<math>40 : 100</math> è circa 0,4) e successivamente moltiplicare per 228,6 ottenendo 90 pollici.</p> |
| MISURA DELLA DIAGONALE (pollici)                                                                                                                                                                                                                                                                                                                                                                                                                                                                                                                                                                                                                                                  | MISURA DELLA DIAGONALE (centimetri) |                                     |            |          |       |          |                                                                                                                                                                                                                                                                                                                                                                                                                                                                                                                                                                                                                                                                                                                                                                  |      |          |        |          |    |      |       |       |                                                                                                                                                                                                                                                                                                                                                                                                                                                                                                                                                                                                                                                                                                                                                                                                                                                                           |
| 40 pollici                                                                                                                                                                                                                                                                                                                                                                                                                                                                                                                                                                                                                                                                        | 101,6 cm                            |                                     |            |          |       |          |                                                                                                                                                                                                                                                                                                                                                                                                                                                                                                                                                                                                                                                                                                                                                                  |      |          |        |          |    |      |       |       |                                                                                                                                                                                                                                                                                                                                                                                                                                                                                                                                                                                                                                                                                                                                                                                                                                                                           |
| .....                                                                                                                                                                                                                                                                                                                                                                                                                                                                                                                                                                                                                                                                             | 228,6 cm                            |                                     |            |          |       |          |                                                                                                                                                                                                                                                                                                                                                                                                                                                                                                                                                                                                                                                                                                                                                                  |      |          |        |          |    |      |       |       |                                                                                                                                                                                                                                                                                                                                                                                                                                                                                                                                                                                                                                                                                                                                                                                                                                                                           |
| Item                                                                                                                                                                                                                                                                                                                                                                                                                                                                                                                                                                                                                                                                              | Mancante                            | Errata                              | Corretta   |          |       |          |                                                                                                                                                                                                                                                                                                                                                                                                                                                                                                                                                                                                                                                                                                                                                                  |      |          |        |          |    |      |       |       |                                                                                                                                                                                                                                                                                                                                                                                                                                                                                                                                                                                                                                                                                                                                                                                                                                                                           |
| D4                                                                                                                                                                                                                                                                                                                                                                                                                                                                                                                                                                                                                                                                                | 3,2%                                | 56,5%                               | 40,3%      |          |       |          |                                                                                                                                                                                                                                                                                                                                                                                                                                                                                                                                                                                                                                                                                                                                                                  |      |          |        |          |    |      |       |       |                                                                                                                                                                                                                                                                                                                                                                                                                                                                                                                                                                                                                                                                                                                                                                                                                                                                           |

| Domanda                                                                                                                                                                                                                                                                                                                                                                                                                                                                                                                                                                                                                                                                                                                        | Caratteristiche                                                                                                                       | Descrizione e commento |                                                                        |                                                                                                                         |                                                                 |                                                                                                                                       |                                                                                                                                                                                                                                                                                                                                                                                                                                                                                                                                                                                                                                                                                                                                        |      |          |   |   |   |   |    |      |       |      |       |       |                                                                                                                                                                                                                                                                                                                                                                                                                                                                                                                                                                                                                                                                                                                                                            |
|--------------------------------------------------------------------------------------------------------------------------------------------------------------------------------------------------------------------------------------------------------------------------------------------------------------------------------------------------------------------------------------------------------------------------------------------------------------------------------------------------------------------------------------------------------------------------------------------------------------------------------------------------------------------------------------------------------------------------------|---------------------------------------------------------------------------------------------------------------------------------------|------------------------|------------------------------------------------------------------------|-------------------------------------------------------------------------------------------------------------------------|-----------------------------------------------------------------|---------------------------------------------------------------------------------------------------------------------------------------|----------------------------------------------------------------------------------------------------------------------------------------------------------------------------------------------------------------------------------------------------------------------------------------------------------------------------------------------------------------------------------------------------------------------------------------------------------------------------------------------------------------------------------------------------------------------------------------------------------------------------------------------------------------------------------------------------------------------------------------|------|----------|---|---|---|---|----|------|-------|------|-------|-------|------------------------------------------------------------------------------------------------------------------------------------------------------------------------------------------------------------------------------------------------------------------------------------------------------------------------------------------------------------------------------------------------------------------------------------------------------------------------------------------------------------------------------------------------------------------------------------------------------------------------------------------------------------------------------------------------------------------------------------------------------------|
| <p>D5. Le frazioni <math>\frac{3}{8}</math> e <math>\frac{15}{40}</math> sono equivalenti?</p> <p>Nella tabella che segue indica la sola argomentazione che giustifica la risposta corretta.</p> <table><tr><th>No, perché ...</th><th>Sì, perché ...</th></tr><tr><td>A. <input type="checkbox"/> i numeratori e i denominatori sono diversi</td><td>C. <input type="checkbox"/> sia nella prima frazione sia nella seconda frazione il numeratore è minore del denominatore</td></tr><tr><td>B. <input type="checkbox"/> 3 è minore di 15 e 8 è minore di 40</td><td>D. <input type="checkbox"/> se si moltiplicano per 5 sia il numeratore sia il denominatore della prima frazione si ottiene la seconda</td></tr></table> | No, perché ...                                                                                                                        | Sì, perché ...         | A. <input type="checkbox"/> i numeratori e i denominatori sono diversi | C. <input type="checkbox"/> sia nella prima frazione sia nella seconda frazione il numeratore è minore del denominatore | B. <input type="checkbox"/> 3 è minore di 15 e 8 è minore di 40 | D. <input type="checkbox"/> se si moltiplicano per 5 sia il numeratore sia il denominatore della prima frazione si ottiene la seconda | <p><b>AMBITO PREVALENTE</b><br/>Numeri</p> <p><b>SCOPO DELLA DOMANDA</b><br/>Riconoscere due frazioni equivalenti e individuare la corretta giustificazione.</p> <p><b>Indicazioni nazionali: TRAGUARDO</b><br/>Costruisce ragionamenti formulando ipotesi, sostenendo le proprie idee e confrontandosi con il punto di vista di altri.</p> <p><b>Indicazioni nazionali: OBIETTIVO</b><br/><i>Operare con le frazioni e riconoscere frazioni equivalenti.</i></p> <p><b>DIMENSIONE</b><br/>Argomentare</p> <p><b>RISULTATI DEL CAMPIONE</b></p> <table><tr><th>Item</th><th>Mancante</th><th>A</th><th>B</th><th>C</th><th>D</th></tr><tr><td>D5</td><td>4,7%</td><td>10,5%</td><td>9,2%</td><td>15,4%</td><td>60,2%</td></tr></table> | Item | Mancante | A | B | C | D | D5 | 4,7% | 10,5% | 9,2% | 15,4% | 60,2% | <p><b>Risposta corretta: D</b><br/>Il quesito richiede di riconoscere che le due frazioni indicate sono equivalenti e che l’argomentazione corretta è quella che descrive un processo che permette di generare una delle frazioni partendo dall’altra e mantenendo invariato il rapporto (opzione D).<br/>La scelta dell’opzione C potrebbe individuare gli alunni che, per giustificare l’equivalenza tra le due frazioni, identificano la relazione tra il numeratore e il denominatore di ciascuna frazione limitandosi a verificare che in entrambe il numeratore è minore del denominatore.<br/>Gli alunni che scelgono le opzioni A e B potrebbero aver interpretato la parola “equivalente” come uguaglianza dei numeratori e dei denominatori.</p> |
| No, perché ...                                                                                                                                                                                                                                                                                                                                                                                                                                                                                                                                                                                                                                                                                                                 | Sì, perché ...                                                                                                                        |                        |                                                                        |                                                                                                                         |                                                                 |                                                                                                                                       |                                                                                                                                                                                                                                                                                                                                                                                                                                                                                                                                                                                                                                                                                                                                        |      |          |   |   |   |   |    |      |       |      |       |       |                                                                                                                                                                                                                                                                                                                                                                                                                                                                                                                                                                                                                                                                                                                                                            |
| A. <input type="checkbox"/> i numeratori e i denominatori sono diversi                                                                                                                                                                                                                                                                                                                                                                                                                                                                                                                                                                                                                                                         | C. <input type="checkbox"/> sia nella prima frazione sia nella seconda frazione il numeratore è minore del denominatore               |                        |                                                                        |                                                                                                                         |                                                                 |                                                                                                                                       |                                                                                                                                                                                                                                                                                                                                                                                                                                                                                                                                                                                                                                                                                                                                        |      |          |   |   |   |   |    |      |       |      |       |       |                                                                                                                                                                                                                                                                                                                                                                                                                                                                                                                                                                                                                                                                                                                                                            |
| B. <input type="checkbox"/> 3 è minore di 15 e 8 è minore di 40                                                                                                                                                                                                                                                                                                                                                                                                                                                                                                                                                                                                                                                                | D. <input type="checkbox"/> se si moltiplicano per 5 sia il numeratore sia il denominatore della prima frazione si ottiene la seconda |                        |                                                                        |                                                                                                                         |                                                                 |                                                                                                                                       |                                                                                                                                                                                                                                                                                                                                                                                                                                                                                                                                                                                                                                                                                                                                        |      |          |   |   |   |   |    |      |       |      |       |       |                                                                                                                                                                                                                                                                                                                                                                                                                                                                                                                                                                                                                                                                                                                                                            |
| Item                                                                                                                                                                                                                                                                                                                                                                                                                                                                                                                                                                                                                                                                                                                           | Mancante                                                                                                                              | A                      | B                                                                      | C                                                                                                                       | D                                                               |                                                                                                                                       |                                                                                                                                                                                                                                                                                                                                                                                                                                                                                                                                                                                                                                                                                                                                        |      |          |   |   |   |   |    |      |       |      |       |       |                                                                                                                                                                                                                                                                                                                                                                                                                                                                                                                                                                                                                                                                                                                                                            |
| D5                                                                                                                                                                                                                                                                                                                                                                                                                                                                                                                                                                                                                                                                                                                             | 4,7%                                                                                                                                  | 10,5%                  | 9,2%                                                                   | 15,4%                                                                                                                   | 60,2%                                                           |                                                                                                                                       |                                                                                                                                                                                                                                                                                                                                                                                                                                                                                                                                                                                                                                                                                                                                        |      |          |   |   |   |   |    |      |       |      |       |       |                                                                                                                                                                                                                                                                                                                                                                                                                                                                                                                                                                                                                                                                                                                                                            |



| Domanda                                                                                                                                                                                     | Caratteristiche                                                                                                                                                                                                                                                                                                                                                                                                                                                                                                                                                                                                                                                                                                                                                                                                                                  | Descrizione e commento |          |        |          |    |      |       |       |                                                                                                                                                                                                                                                                                                                                                                                                                                                                                                                                                                                                                               |
|---------------------------------------------------------------------------------------------------------------------------------------------------------------------------------------------|--------------------------------------------------------------------------------------------------------------------------------------------------------------------------------------------------------------------------------------------------------------------------------------------------------------------------------------------------------------------------------------------------------------------------------------------------------------------------------------------------------------------------------------------------------------------------------------------------------------------------------------------------------------------------------------------------------------------------------------------------------------------------------------------------------------------------------------------------|------------------------|----------|--------|----------|----|------|-------|-------|-------------------------------------------------------------------------------------------------------------------------------------------------------------------------------------------------------------------------------------------------------------------------------------------------------------------------------------------------------------------------------------------------------------------------------------------------------------------------------------------------------------------------------------------------------------------------------------------------------------------------------|
| <p>D6. Completa la figura in modo da ottenere un pentagono.</p> <p>Tre lati sono già stati disegnati.</p> 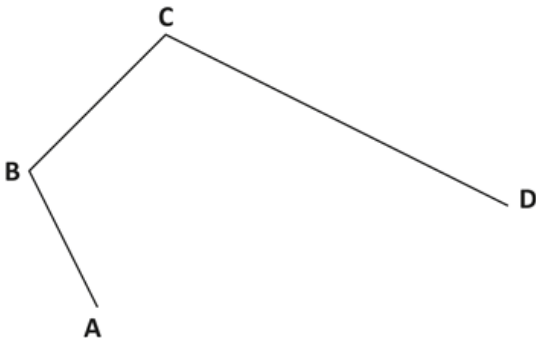 | <p><b>AMBITO PREVALENTE</b></p> <p>Spazio figure</p> <p><b>SCOPO DELLA DOMANDA</b></p> <p>Disegnare una figura geometrica rispettando le caratteristiche indicate.</p> <p><b>Indicazioni nazionali: TRAGUARDO</b></p> <p>Descrive, denomina e classifica figure in base a caratteristiche geometriche, ne determina misure, progetta e costruisce modelli concreti di vario tipo.</p> <p><b>Indicazioni nazionali: OBIETTIVO</b></p> <p><i>Riprodurre una figura in base a una descrizione, utilizzando gli strumenti opportuni (carta a quadretti, riga e compasso, squadre, software di geometria).</i></p> <p><b>DIMENSIONE</b></p> <p>Conoscere</p> <p><b>RISULTATI DEL CAMPIONE</b></p> <table><tr><th>Item</th><th>Mancante</th><th>Errata</th><th>Corretta</th></tr><tr><td>D6</td><td>2,9%</td><td>35,1%</td><td>62,0%</td></tr></table> | Item                   | Mancante | Errata | Corretta | D6 | 2,9% | 35,1% | 62,0% | <p><b>Risposta corretta: sono corrette tutte le figure pentagonali, concave o convesse. Esempi di risposte corrette:</b></p> 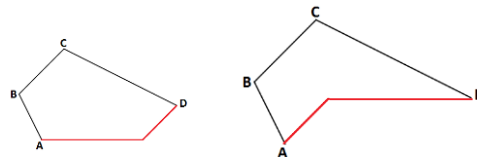 <p>Il quesito richiede di completare una figura geometrica di cui sono già stati dati 3 lati al fine di ottenere un pentagono.</p> <p>Lo studente deve mantenere il controllo sul numero dei lati necessari affinché la figura non abbia più o meno di 5 lati.</p> <p>Un errore frequente potrebbe essere quello di tentare di disegnare un pentagono regolare utilizzando solo parzialmente il lato CD.</p> |
| Item                                                                                                                                                                                        | Mancante                                                                                                                                                                                                                                                                                                                                                                                                                                                                                                                                                                                                                                                                                                                                                                                                                                         | Errata                 | Corretta |        |          |    |      |       |       |                                                                                                                                                                                                                                                                                                                                                                                                                                                                                                                                                                                                                               |
| D6                                                                                                                                                                                          | 2,9%                                                                                                                                                                                                                                                                                                                                                                                                                                                                                                                                                                                                                                                                                                                                                                                                                                             | 35,1%                  | 62,0%    |        |          |    |      |       |       |                                                                                                                                                                                                                                                                                                                                                                                                                                                                                                                                                                                                                               |

| Domanda                                                                                                                                                                                                                                                                                                                                                                                                                                                | Caratteristiche                                                                                                                                                                                                                                                                                                                                                                                                                                                                                                                                                                                                                                                                                                                                                             | Descrizione e commento |          |       |      |   |   |    |      |      |      |       |      |                                                                                                                                                                                                                                                                                                                                                                                                                                                                                       |
|--------------------------------------------------------------------------------------------------------------------------------------------------------------------------------------------------------------------------------------------------------------------------------------------------------------------------------------------------------------------------------------------------------------------------------------------------------|-----------------------------------------------------------------------------------------------------------------------------------------------------------------------------------------------------------------------------------------------------------------------------------------------------------------------------------------------------------------------------------------------------------------------------------------------------------------------------------------------------------------------------------------------------------------------------------------------------------------------------------------------------------------------------------------------------------------------------------------------------------------------------|------------------------|----------|-------|------|---|---|----|------|------|------|-------|------|---------------------------------------------------------------------------------------------------------------------------------------------------------------------------------------------------------------------------------------------------------------------------------------------------------------------------------------------------------------------------------------------------------------------------------------------------------------------------------------|
| <p>D7. L'immagine riproduce la piantina in scala di una camera da letto lunga 5,2 m e larga 4,5 m.</p> <div>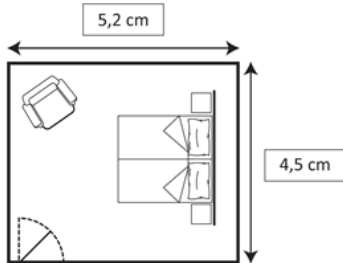</div> <p>Quale scala di riduzione è stata usata per disegnare la piantina?</p> <p>A. <input type="checkbox"/> 1 : 1</p> <p>B. <input type="checkbox"/> 1 : 10</p> <p>C. <input type="checkbox"/> 1 : 100</p> <p>D. <input type="checkbox"/> 1 : 1000</p> | <p><b>AMBITO PREVALENTE</b><br/>Relazioni e funzioni</p> <p><b>SCOPO DELLA DOMANDA</b><br/>Individuare la scala di riduzione utilizzata in una piantina.</p> <p><b>Indicazioni nazionali: TRAGUARDO</b><br/>Riconosce e utilizza rappresentazioni diverse di oggetti matematici (numeri decimali, frazioni, percentuali, scale di riduzione, ...).</p> <p><b>Indicazioni nazionali: OBIETTIVO</b><br/><i>Riprodurre in scala una figura assegnata (utilizzando, ad esempio, la carta a quadretti).</i></p> <p><b>DIMENSIONE</b><br/>Conoscere</p> <p><b>RISULTATI DEL CAMPIONE</b></p> <table><tr><th>Item</th><th>Mancante</th><th>A</th><th>B</th><th>C</th><th>D</th></tr><tr><td>D7</td><td>2,1%</td><td>7,4%</td><td>30,0</td><td>54,3%</td><td>6,2%</td></tr></table> | Item                   | Mancante | A     | B    | C | D | D7 | 2,1% | 7,4% | 30,0 | 54,3% | 6,2% | <p><b>Risposta corretta: C</b></p> <p>Il quesito richiede di individuare, tra le quattro opzioni date, la scala di riduzione utilizzata per disegnare la piantina di una camera da letto. Gli studenti che scelgono l'opzione A (scala 1:1) commettono l'errore di non considerare la variazione dell'unità di misura, ma di riferirsi soltanto ai numeri scritti nel testo e nel disegno. Le opzioni B e D si riferiscono a possibili errori di conversione tra unità di misura.</p> |
| Item                                                                                                                                                                                                                                                                                                                                                                                                                                                   | Mancante                                                                                                                                                                                                                                                                                                                                                                                                                                                                                                                                                                                                                                                                                                                                                                    | A                      | B        | C     | D    |   |   |    |      |      |      |       |      |                                                                                                                                                                                                                                                                                                                                                                                                                                                                                       |
| D7                                                                                                                                                                                                                                                                                                                                                                                                                                                     | 2,1%                                                                                                                                                                                                                                                                                                                                                                                                                                                                                                                                                                                                                                                                                                                                                                        | 7,4%                   | 30,0     | 54,3% | 6,2% |   |   |    |      |      |      |       |      |                                                                                                                                                                                                                                                                                                                                                                                                                                                                                       |



| Domanda                                                                                                                                                                                                                                                                                                                                                                                                                                                                  | Caratteristiche                                                                                                                                                                                                                                                                                                                                                                                                                                                                                                                                                                                                                                                                                                                                                                                                                                                                                                                                                                                                                                                                                                                                                                                                                | Descrizione e commento |          |        |          |     |      |       |       |     |      |       |       |     |      |       |       |                                                                                                                                                                                                                                                                                                                                                                                                                                                                                                                                                                                                                                                                                                                                                                                                                                                                                                                                                                                                                                             |
|--------------------------------------------------------------------------------------------------------------------------------------------------------------------------------------------------------------------------------------------------------------------------------------------------------------------------------------------------------------------------------------------------------------------------------------------------------------------------|--------------------------------------------------------------------------------------------------------------------------------------------------------------------------------------------------------------------------------------------------------------------------------------------------------------------------------------------------------------------------------------------------------------------------------------------------------------------------------------------------------------------------------------------------------------------------------------------------------------------------------------------------------------------------------------------------------------------------------------------------------------------------------------------------------------------------------------------------------------------------------------------------------------------------------------------------------------------------------------------------------------------------------------------------------------------------------------------------------------------------------------------------------------------------------------------------------------------------------|------------------------|----------|--------|----------|-----|------|-------|-------|-----|------|-------|-------|-----|------|-------|-------|---------------------------------------------------------------------------------------------------------------------------------------------------------------------------------------------------------------------------------------------------------------------------------------------------------------------------------------------------------------------------------------------------------------------------------------------------------------------------------------------------------------------------------------------------------------------------------------------------------------------------------------------------------------------------------------------------------------------------------------------------------------------------------------------------------------------------------------------------------------------------------------------------------------------------------------------------------------------------------------------------------------------------------------------|
| <p>D8. Il grafico rappresenta le temperature registrate in una settimana di novembre alle ore 8 a Bolzano.</p> <div></div> <p>a. Quale temperatura è stata registrata più volte?<br/>Risposta: .....gradi</p> <p>b. Qual è la differenza di temperatura tra martedì e domenica?<br/>Risposta: ..... gradi</p> <p>c. Osserva sul grafico le temperature registrate da martedì a venerdì.<br/>Qual è la media di queste quattro temperature?<br/>Risposta: ..... gradi</p> | <p><b>AMBITO PREVALENTE</b><br/>Dati e previsioni</p> <p><b>SCOPO DELLA DOMANDA</b></p> <p>a. Individuare la moda di un insieme di dati rappresentati in un diagramma.</p> <p>b. Calcolare la differenza tra i valori di due temperature rappresentati su un diagramma.</p> <p>c. Calcolare la media tra i valori di temperature rappresentate in un grafico.</p> <p><b>Indicazioni nazionali: TRAGUARDO</b><br/>Ricerca dati per ricavare informazioni e costruisce rappresentazioni (tabelle e grafici). Ricava informazioni anche da dati rappresentati in tabelle e grafici.</p> <p><b>Indicazioni nazionali: OBIETTIVO</b></p> <p>a. e c. <i>Usare le nozioni di frequenza, di moda e di media aritmetica, se adeguata alla tipologia dei dati a disposizione.</i></p> <p>b. <i>Interpretare i numeri interi negativi in contesti concreti.</i></p> <p><b>DIMENSIONE</b><br/>Risolvere problemi</p> <p><b>RISULTATI DEL CAMPIONE</b></p> <table><tr><th>Item</th><th>Mancante</th><th>Errata</th><th>Corretta</th></tr><tr><td>D8a</td><td>1,2%</td><td>18,6%</td><td>80,2%</td></tr><tr><td>D8b</td><td>2,5%</td><td>37,5%</td><td>60,0%</td></tr><tr><td>D8c</td><td>6,6%</td><td>54,7%</td><td>38,7%</td></tr></table> | Item                   | Mancante | Errata | Corretta | D8a | 1,2% | 18,6% | 80,2% | D8b | 2,5% | 37,5% | 60,0% | D8c | 6,6% | 54,7% | 38,7% | <p><b>Risposta corretta: a. -2 b. 3 o -3 c. 2</b></p> <p>Il quesito richiede di leggere i valori delle temperature registrati in un certo intervallo di tempo e rappresentati su un diagramma a punti. Le temperature assumono sia valori positivi, sia negativi.</p> <p>I tre item richiedono di individuare sull’asse delle ordinate il valore corrispondente ai punti del diagramma, tenendo conto della metrica.</p> <p>L’item a. chiede di individuare la moda tra sette valori rappresentati nel diagramma; l’item b. richiede di calcolare la differenza di temperatura tra due numeri interi (di cui uno negativo), i cui valori devono essere individuati attraverso la lettura del diagramma.</p> <p>L’item c. chiede di calcolare la media aritmetica di quattro numeri interi positivi che si possono ricavare dalla lettura del diagramma; lo studente può procedere per via aritmetica, applicando l’algoritmo di calcolo della media aritmetica, o per via grafica, osservando la distribuzione dei punti nel diagramma.</p> |
| Item                                                                                                                                                                                                                                                                                                                                                                                                                                                                     | Mancante                                                                                                                                                                                                                                                                                                                                                                                                                                                                                                                                                                                                                                                                                                                                                                                                                                                                                                                                                                                                                                                                                                                                                                                                                       | Errata                 | Corretta |        |          |     |      |       |       |     |      |       |       |     |      |       |       |                                                                                                                                                                                                                                                                                                                                                                                                                                                                                                                                                                                                                                                                                                                                                                                                                                                                                                                                                                                                                                             |
| D8a                                                                                                                                                                                                                                                                                                                                                                                                                                                                      | 1,2%                                                                                                                                                                                                                                                                                                                                                                                                                                                                                                                                                                                                                                                                                                                                                                                                                                                                                                                                                                                                                                                                                                                                                                                                                           | 18,6%                  | 80,2%    |        |          |     |      |       |       |     |      |       |       |     |      |       |       |                                                                                                                                                                                                                                                                                                                                                                                                                                                                                                                                                                                                                                                                                                                                                                                                                                                                                                                                                                                                                                             |
| D8b                                                                                                                                                                                                                                                                                                                                                                                                                                                                      | 2,5%                                                                                                                                                                                                                                                                                                                                                                                                                                                                                                                                                                                                                                                                                                                                                                                                                                                                                                                                                                                                                                                                                                                                                                                                                           | 37,5%                  | 60,0%    |        |          |     |      |       |       |     |      |       |       |     |      |       |       |                                                                                                                                                                                                                                                                                                                                                                                                                                                                                                                                                                                                                                                                                                                                                                                                                                                                                                                                                                                                                                             |
| D8c                                                                                                                                                                                                                                                                                                                                                                                                                                                                      | 6,6%                                                                                                                                                                                                                                                                                                                                                                                                                                                                                                                                                                                                                                                                                                                                                                                                                                                                                                                                                                                                                                                                                                                                                                                                                           | 54,7%                  | 38,7%    |        |          |     |      |       |       |     |      |       |       |     |      |       |       |                                                                                                                                                                                                                                                                                                                                                                                                                                                                                                                                                                                                                                                                                                                                                                                                                                                                                                                                                                                                                                             |

| Domanda                                                                                                                                                                                                            | Caratteristiche                                                                                                                                                                                                                                                                                                                                                                                                                                                                                                                                                                                                                                                                                                                                                                              | Descrizione e commento |          |        |          |    |      |       |       |                                                                                                                                                                                                                                                                                                                                                                                                                                                                                                                                                              |
|--------------------------------------------------------------------------------------------------------------------------------------------------------------------------------------------------------------------|----------------------------------------------------------------------------------------------------------------------------------------------------------------------------------------------------------------------------------------------------------------------------------------------------------------------------------------------------------------------------------------------------------------------------------------------------------------------------------------------------------------------------------------------------------------------------------------------------------------------------------------------------------------------------------------------------------------------------------------------------------------------------------------------|------------------------|----------|--------|----------|----|------|-------|-------|--------------------------------------------------------------------------------------------------------------------------------------------------------------------------------------------------------------------------------------------------------------------------------------------------------------------------------------------------------------------------------------------------------------------------------------------------------------------------------------------------------------------------------------------------------------|
| <div>D9. Osserva questa retta dei numeri.</div> <div>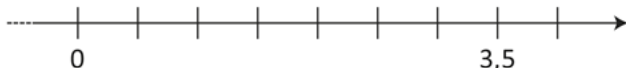</div> <div>Scrivi il numero 2 al posto giusto sulla retta dei numeri.</div> | <div>AMBITO PREVALENTE</div> <div>Numeri</div> <div>SCOPO DELLA DOMANDA</div> <div>Posizionare un numero su una retta identificando l'unità di misura data.</div> <div>Indicazioni nazionali: TRAGUARDO</div> <div>Riconosce e utilizza rappresentazioni diverse di oggetti matematici (numeri decimali, frazioni, percentuali, scale di riduzione, ...).</div> <div>Indicazioni nazionali: OBIETTIVO</div> <div>Rappresentare i numeri conosciuti sulla retta e utilizzare scale graduate in contesti significativi per le scienze e per la tecnica.</div> <div>DIMENSIONE</div> <div>Conoscere</div> <div>RISULTATI DEL CAMPIONE</div> <table><tr><th>Item</th><th>Mancante</th><th>Errata</th><th>Corretta</th></tr><tr><td>D9</td><td>3,1%</td><td>15,7%</td><td>81,2%</td></tr></table> | Item                   | Mancante | Errata | Corretta | D9 | 3,1% | 15,7% | 81,2% | <div>Risposta corretta:</div> <div>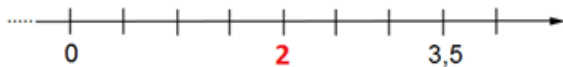</div> <div>Il quesito richiede di riconoscere, sulla retta dei numeri data, che la distanza tra due tacche successive corrisponde a 0,5 e di collocare il numero nella posizione corretta sulla retta. Un possibile errore potrebbe essere quello di posizionare il numero 2 in corrispondenza della seconda tacca dopo lo 0 perché lo studente potrebbe considerare unitaria la distanza tra due tacche consecutive disegnate.</div> |
| Item                                                                                                                                                                                                               | Mancante                                                                                                                                                                                                                                                                                                                                                                                                                                                                                                                                                                                                                                                                                                                                                                                     | Errata                 | Corretta |        |          |    |      |       |       |                                                                                                                                                                                                                                                                                                                                                                                                                                                                                                                                                              |
| D9                                                                                                                                                                                                                 | 3,1%                                                                                                                                                                                                                                                                                                                                                                                                                                                                                                                                                                                                                                                                                                                                                                                         | 15,7%                  | 81,2%    |        |          |    |      |       |       |                                                                                                                                                                                                                                                                                                                                                                                                                                                                                                                                                              |

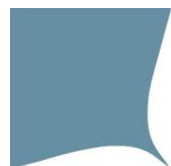

| Domanda                                                                                                                                                                                                                                                                                                                                                                                                                                          | Caratteristiche                                                                                                                                                                                                                                                                                                                                                                                                                                                                                                                                                                                                                                                                                                                                                                                                          | Descrizione e commento |          |       |       |   |   |     |      |      |       |       |       |                                                                                                                                                                                                                                                                                                                                                                                                                                                                                                                                                                                                                    |
|--------------------------------------------------------------------------------------------------------------------------------------------------------------------------------------------------------------------------------------------------------------------------------------------------------------------------------------------------------------------------------------------------------------------------------------------------|--------------------------------------------------------------------------------------------------------------------------------------------------------------------------------------------------------------------------------------------------------------------------------------------------------------------------------------------------------------------------------------------------------------------------------------------------------------------------------------------------------------------------------------------------------------------------------------------------------------------------------------------------------------------------------------------------------------------------------------------------------------------------------------------------------------------------|------------------------|----------|-------|-------|---|---|-----|------|------|-------|-------|-------|--------------------------------------------------------------------------------------------------------------------------------------------------------------------------------------------------------------------------------------------------------------------------------------------------------------------------------------------------------------------------------------------------------------------------------------------------------------------------------------------------------------------------------------------------------------------------------------------------------------------|
| <p>D10. Osserva la seguente figura.</p> <div>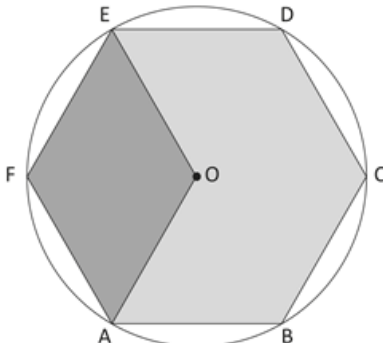</div> <p>L'area dell'esagono regolare ABCDEF è 30 cm².</p> <p>Il punto O è il centro dell'esagono.</p> <p>Qual è l'area del rombo AOE?</p> <p>A. <input type="checkbox"/> 5 cm²</p> <p>B. <input type="checkbox"/> 10 cm²</p> <p>C. <input type="checkbox"/> 15 cm²</p> <p>D. <input type="checkbox"/> 20 cm²</p> | <p><b>AMBITO PREVALENTE</b><br/>Spazio figure</p> <p><b>SCOPO DELLA DOMANDA</b><br/>Individuare l'area di una parte di un esagono regolare.</p> <p><b>Indicazioni nazionali: TRAGUARDO</b><br/>Descrive, denomina e classifica figure in base a caratteristiche geometriche, ne determina misure, progetta e costruisce modelli concreti di vario tipo.</p> <p><b>Indicazioni nazionali: OBIETTIVO</b><br/><i>Determinare l'area di rettangoli e triangoli e di altre figure per scomposizione o utilizzando le più comuni formule.</i></p> <p><b>DIMENSIONE</b><br/>Risolvere problemi</p> <p><b>RISULTATI DEL CAMPIONE</b></p> <table><tr><th>Item</th><th>Mancante</th><th>A</th><th>B</th><th>C</th><th>D</th></tr><tr><td>D10</td><td>1,8%</td><td>9,4%</td><td>51,4%</td><td>23,2%</td><td>14,2%</td></tr></table> | Item                   | Mancante | A     | B     | C | D | D10 | 1,8% | 9,4% | 51,4% | 23,2% | 14,2% | <p><b>Risposta corretta: B</b></p> <p>Il quesito richiede di scegliere tra quattro opzioni quella che rappresenta il valore dell'area di un rombo che corrisponde a 1/3 dell'area dell'esagono regolare nel quale è stato disegnato. L'opzione A può intercettare coloro che scompongono l'esagono in sei triangoli equilateri e calcolano l'area di uno di questi, corrispondente alla metà del rombo. L'opzione C potrebbe essere scelta da coloro che “percettivamente” vedono il rombo come metà dell'esagono. L'opzione D potrebbe essere scelta dagli studenti che calcolano l'area della figura ABCDEO.</p> |
| Item                                                                                                                                                                                                                                                                                                                                                                                                                                             | Mancante                                                                                                                                                                                                                                                                                                                                                                                                                                                                                                                                                                                                                                                                                                                                                                                                                 | A                      | B        | C     | D     |   |   |     |      |      |       |       |       |                                                                                                                                                                                                                                                                                                                                                                                                                                                                                                                                                                                                                    |
| D10                                                                                                                                                                                                                                                                                                                                                                                                                                              | 1,8%                                                                                                                                                                                                                                                                                                                                                                                                                                                                                                                                                                                                                                                                                                                                                                                                                     | 9,4%                   | 51,4%    | 23,2% | 14,2% |   |   |     |      |      |       |       |       |                                                                                                                                                                                                                                                                                                                                                                                                                                                                                                                                                                                                                    |

| Domanda                                                                                                                                                                                                                                                                                                                                                                                                                                                                                                                                                                                                            | Caratteristiche                                                                                        | Descrizione e commento                                                                                 |                                                                                                      |                                                                                                      |                                 |    |       |       |                                                                                                                                                                                                                                                                                                                                                                                                                                                                                                                                                                                                                                                                                                                                                                                                      |      |          |        |          |     |      |       |       |                                                                                                                                                                                                                                                                                                                                                                                                                                                                                                         |
|--------------------------------------------------------------------------------------------------------------------------------------------------------------------------------------------------------------------------------------------------------------------------------------------------------------------------------------------------------------------------------------------------------------------------------------------------------------------------------------------------------------------------------------------------------------------------------------------------------------------|--------------------------------------------------------------------------------------------------------|--------------------------------------------------------------------------------------------------------|------------------------------------------------------------------------------------------------------|------------------------------------------------------------------------------------------------------|---------------------------------|----|-------|-------|------------------------------------------------------------------------------------------------------------------------------------------------------------------------------------------------------------------------------------------------------------------------------------------------------------------------------------------------------------------------------------------------------------------------------------------------------------------------------------------------------------------------------------------------------------------------------------------------------------------------------------------------------------------------------------------------------------------------------------------------------------------------------------------------------|------|----------|--------|----------|-----|------|-------|-------|---------------------------------------------------------------------------------------------------------------------------------------------------------------------------------------------------------------------------------------------------------------------------------------------------------------------------------------------------------------------------------------------------------------------------------------------------------------------------------------------------------|
| <p>D11. Qual è il numero minimo di confezioni necessarie per avere un litro di ciascun prodotto?</p> <p>Completa la tabella.</p> <table><tr><td>Confezione</td><td>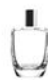<br/>PROFUMO<br/>100 mL</td><td>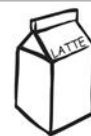<br/>LATTE<br/>1/2 L</td><td>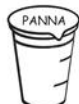<br/>PANNA<br/>250 mL</td></tr><tr><td>Numero di confezioni necessarie</td><td>10</td><td>.....</td><td>.....</td></tr></table> | Confezione                                                                                             | <br>PROFUMO<br>100 mL | <br>LATTE<br>1/2 L  | <br>PANNA<br>250 mL | Numero di confezioni necessarie | 10 | ..... | ..... | <p><b>AMBITO PREVALENTE</b><br/>Relazioni e funzioni</p> <p><b>SCOPO DELLA DOMANDA</b><br/>Stabilire quante volte un'unità è contenuta in un'altra.</p> <p><b>Indicazioni nazionali: TRAGUARDO</b><br/>Riconosce e utilizza rappresentazioni diverse di oggetti matematici (numeri decimali, frazioni, percentuali, scale di riduzione, ...).</p> <p><b>Indicazioni nazionali: OBIETTIVO</b><br/><i>Utilizzare le principali unità di misura per lunghezze, angoli, aree, volumi/capacità, intervalli temporali, masse, pesi per effettuare misure e stime.</i></p> <p><b>DIMENSIONE</b><br/>Conoscere</p> <p><b>RISULTATI DEL CAMPIONE</b></p> <table><tr><th>Item</th><th>Mancante</th><th>Errata</th><th>Corretta</th></tr><tr><td>D11</td><td>5,1%</td><td>62,8%</td><td>32,1%</td></tr></table> | Item | Mancante | Errata | Corretta | D11 | 5,1% | 62,8% | 32,1% | <p><b>Risposta corretta: 2 e 4</b></p> <p>Il quesito richiede di individuare il minimo numero di confezioni necessarie per ottenere un litro di ciascuno dei due prodotti rappresentati. Le confezioni hanno diverse capacità espresse o come frazione di litro o in mL. È quindi necessario individuare la relazione tra la quantità di prodotto presente in ciascuna confezione e un litro di ciascun prodotto.</p> <p>Le misure sono espresse secondo le convenzioni del Sistema Internazionale.</p> |
| Confezione                                                                                                                                                                                                                                                                                                                                                                                                                                                                                                                                                                                                         | <br>PROFUMO<br>100 mL | <br>LATTE<br>1/2 L    | <br>PANNA<br>250 mL |                                                                                                      |                                 |    |       |       |                                                                                                                                                                                                                                                                                                                                                                                                                                                                                                                                                                                                                                                                                                                                                                                                      |      |          |        |          |     |      |       |       |                                                                                                                                                                                                                                                                                                                                                                                                                                                                                                         |
| Numero di confezioni necessarie                                                                                                                                                                                                                                                                                                                                                                                                                                                                                                                                                                                    | 10                                                                                                     | .....                                                                                                  | .....                                                                                                |                                                                                                      |                                 |    |       |       |                                                                                                                                                                                                                                                                                                                                                                                                                                                                                                                                                                                                                                                                                                                                                                                                      |      |          |        |          |     |      |       |       |                                                                                                                                                                                                                                                                                                                                                                                                                                                                                                         |
| Item                                                                                                                                                                                                                                                                                                                                                                                                                                                                                                                                                                                                               | Mancante                                                                                               | Errata                                                                                                 | Corretta                                                                                             |                                                                                                      |                                 |    |       |       |                                                                                                                                                                                                                                                                                                                                                                                                                                                                                                                                                                                                                                                                                                                                                                                                      |      |          |        |          |     |      |       |       |                                                                                                                                                                                                                                                                                                                                                                                                                                                                                                         |
| D11                                                                                                                                                                                                                                                                                                                                                                                                                                                                                                                                                                                                                | 5,1%                                                                                                   | 62,8%                                                                                                  | 32,1%                                                                                                |                                                                                                      |                                 |    |       |       |                                                                                                                                                                                                                                                                                                                                                                                                                                                                                                                                                                                                                                                                                                                                                                                                      |      |          |        |          |     |      |       |       |                                                                                                                                                                                                                                                                                                                                                                                                                                                                                                         |



| Domanda                                                                                                                                                                                                                                                                                                                                                                                                                                                                                                                                                                                                                                                                                                                                                                                                                                                                                                                                                                                                                 | Caratteristiche | Descrizione e commento |          |        |     |     |         |     |     |        |    |     |      |    |     |         |     |     |                                                                                                                                                                                                                                                                                                                                                                                                                                                                                                                                                                                                                                                                                                                                                                                                                                                                                                                                                                                                 |      |          |        |          |      |      |       |       |      |      |       |       |      |      |      |       |                                                                                                                                                                                                                                                                                                                                                                                                                                                                                                                                                                                                                                                                                                                                                                                                                                                                                                                                                                                                                                        |
|-------------------------------------------------------------------------------------------------------------------------------------------------------------------------------------------------------------------------------------------------------------------------------------------------------------------------------------------------------------------------------------------------------------------------------------------------------------------------------------------------------------------------------------------------------------------------------------------------------------------------------------------------------------------------------------------------------------------------------------------------------------------------------------------------------------------------------------------------------------------------------------------------------------------------------------------------------------------------------------------------------------------------|-----------------|------------------------|----------|--------|-----|-----|---------|-----|-----|--------|----|-----|------|----|-----|---------|-----|-----|-------------------------------------------------------------------------------------------------------------------------------------------------------------------------------------------------------------------------------------------------------------------------------------------------------------------------------------------------------------------------------------------------------------------------------------------------------------------------------------------------------------------------------------------------------------------------------------------------------------------------------------------------------------------------------------------------------------------------------------------------------------------------------------------------------------------------------------------------------------------------------------------------------------------------------------------------------------------------------------------------|------|----------|--------|----------|------|------|-------|-------|------|------|-------|-------|------|------|------|-------|----------------------------------------------------------------------------------------------------------------------------------------------------------------------------------------------------------------------------------------------------------------------------------------------------------------------------------------------------------------------------------------------------------------------------------------------------------------------------------------------------------------------------------------------------------------------------------------------------------------------------------------------------------------------------------------------------------------------------------------------------------------------------------------------------------------------------------------------------------------------------------------------------------------------------------------------------------------------------------------------------------------------------------------|
| <p><b>D12. Questo grafico rappresenta la percentuale di popolazione che ha utilizzato internet nel 2005 e nel 2015 nei cinque continenti.</b></p> <table border="1"><thead><tr><th>Continento</th><th>2005</th><th>2015</th></tr></thead><tbody><tr><td>Europa</td><td>42%</td><td>74%</td></tr><tr><td>Oceania</td><td>11%</td><td>39%</td></tr><tr><td>Africa</td><td>2%</td><td>21%</td></tr><tr><td>Asia</td><td>9%</td><td>37%</td></tr><tr><td>America</td><td>46%</td><td>76%</td></tr></tbody></table> <p>Sulla base dei dati riportati nel grafico, completa le seguenti frasi.</p> <p>a. Nel 2005 la percentuale della popolazione che in Asia utilizzava internet era pari al .....%.</p> <p>b. Nel 2015 la percentuale della popolazione che utilizzava internet in ..... era esattamente la metà della percentuale della popolazione che nel 2005 lo utilizzava in Europa.</p> <p>c. Nel 2015, tra i cinque continenti, in ..... c'era la più alta percentuale di popolazione che utilizzava internet.</p> | Continento      | 2005                   | 2015     | Europa | 42% | 74% | Oceania | 11% | 39% | Africa | 2% | 21% | Asia | 9% | 37% | America | 46% | 76% | <p><b>AMBITO PREVALENTE</b><br/>Dati e previsioni</p> <p><b>SCOPO DELLA DOMANDA</b><br/>Leggere e interpretare informazioni rappresentate in un diagramma a barre orizzontali.</p> <p><b>Indicazioni nazionali: TRAGUARDO</b><br/>Ricerca dati per ricavare informazioni e costruisce rappresentazioni (tabelle e grafici). Ricava informazioni anche da dati rappresentati in tabelle e grafici.</p> <p><b>Indicazioni nazionali: OBIETTIVO</b><br/><i>Rappresentare relazioni e dati e, in situazioni significative, utilizzare le rappresentazioni per ricavare informazioni, formulare giudizi e prendere decisioni.</i></p> <p><b>DIMENSIONE</b><br/>Conoscere</p> <p><b>RISULTATI DEL CAMPIONE</b></p> <table><tr><th>Item</th><th>Mancante</th><th>Errata</th><th>Corretta</th></tr><tr><td>D12a</td><td>2,5%</td><td>22,0%</td><td>75,5%</td></tr><tr><td>D12b</td><td>3,5%</td><td>35,2%</td><td>61,3%</td></tr><tr><td>D12c</td><td>1,9%</td><td>7,9%</td><td>90,2%</td></tr></table> | Item | Mancante | Errata | Corretta | D12a | 2,5% | 22,0% | 75,5% | D12b | 3,5% | 35,2% | 61,3% | D12c | 1,9% | 7,9% | 90,2% | <p><b>Risposta corretta:</b><br/><b>a. 9    b. Africa    c. America</b></p> <p>Il quesito, articolato in tre item, richiede di leggere e interpretare dati, relativi a diverse aree geografiche e diverse annualità, rappresentati attraverso un diagramma a barre orizzontali.</p> <p>In particolare:<br/>l'item a. chiede di individuare nel grafico la barra relativa al continente asiatico nell'anno 2005 e di leggerne il valore corrispondente riportato in corrispondenza della barra stessa; l'item b. chiede di operare un confronto tra valori relativi ad aree geografiche e ad annualità diverse per individuare quello che soddisfa una relazione data; l'item c. richiede di effettuare un confronto tra cinque valori relativi all'anno 2015 per individuare quello maggiore.</p> <p>Un elemento di complessità potrebbe essere rappresentato dal fatto di dover mantenere simultaneamente il controllo su dati e vincoli, forniti sia in forma grafica dal diagramma a barre, sia in forma linguistica nel testo.</p> |
| Continento                                                                                                                                                                                                                                                                                                                                                                                                                                                                                                                                                                                                                                                                                                                                                                                                                                                                                                                                                                                                              | 2005            | 2015                   |          |        |     |     |         |     |     |        |    |     |      |    |     |         |     |     |                                                                                                                                                                                                                                                                                                                                                                                                                                                                                                                                                                                                                                                                                                                                                                                                                                                                                                                                                                                                 |      |          |        |          |      |      |       |       |      |      |       |       |      |      |      |       |                                                                                                                                                                                                                                                                                                                                                                                                                                                                                                                                                                                                                                                                                                                                                                                                                                                                                                                                                                                                                                        |
| Europa                                                                                                                                                                                                                                                                                                                                                                                                                                                                                                                                                                                                                                                                                                                                                                                                                                                                                                                                                                                                                  | 42%             | 74%                    |          |        |     |     |         |     |     |        |    |     |      |    |     |         |     |     |                                                                                                                                                                                                                                                                                                                                                                                                                                                                                                                                                                                                                                                                                                                                                                                                                                                                                                                                                                                                 |      |          |        |          |      |      |       |       |      |      |       |       |      |      |      |       |                                                                                                                                                                                                                                                                                                                                                                                                                                                                                                                                                                                                                                                                                                                                                                                                                                                                                                                                                                                                                                        |
| Oceania                                                                                                                                                                                                                                                                                                                                                                                                                                                                                                                                                                                                                                                                                                                                                                                                                                                                                                                                                                                                                 | 11%             | 39%                    |          |        |     |     |         |     |     |        |    |     |      |    |     |         |     |     |                                                                                                                                                                                                                                                                                                                                                                                                                                                                                                                                                                                                                                                                                                                                                                                                                                                                                                                                                                                                 |      |          |        |          |      |      |       |       |      |      |       |       |      |      |      |       |                                                                                                                                                                                                                                                                                                                                                                                                                                                                                                                                                                                                                                                                                                                                                                                                                                                                                                                                                                                                                                        |
| Africa                                                                                                                                                                                                                                                                                                                                                                                                                                                                                                                                                                                                                                                                                                                                                                                                                                                                                                                                                                                                                  | 2%              | 21%                    |          |        |     |     |         |     |     |        |    |     |      |    |     |         |     |     |                                                                                                                                                                                                                                                                                                                                                                                                                                                                                                                                                                                                                                                                                                                                                                                                                                                                                                                                                                                                 |      |          |        |          |      |      |       |       |      |      |       |       |      |      |      |       |                                                                                                                                                                                                                                                                                                                                                                                                                                                                                                                                                                                                                                                                                                                                                                                                                                                                                                                                                                                                                                        |
| Asia                                                                                                                                                                                                                                                                                                                                                                                                                                                                                                                                                                                                                                                                                                                                                                                                                                                                                                                                                                                                                    | 9%              | 37%                    |          |        |     |     |         |     |     |        |    |     |      |    |     |         |     |     |                                                                                                                                                                                                                                                                                                                                                                                                                                                                                                                                                                                                                                                                                                                                                                                                                                                                                                                                                                                                 |      |          |        |          |      |      |       |       |      |      |       |       |      |      |      |       |                                                                                                                                                                                                                                                                                                                                                                                                                                                                                                                                                                                                                                                                                                                                                                                                                                                                                                                                                                                                                                        |
| America                                                                                                                                                                                                                                                                                                                                                                                                                                                                                                                                                                                                                                                                                                                                                                                                                                                                                                                                                                                                                 | 46%             | 76%                    |          |        |     |     |         |     |     |        |    |     |      |    |     |         |     |     |                                                                                                                                                                                                                                                                                                                                                                                                                                                                                                                                                                                                                                                                                                                                                                                                                                                                                                                                                                                                 |      |          |        |          |      |      |       |       |      |      |       |       |      |      |      |       |                                                                                                                                                                                                                                                                                                                                                                                                                                                                                                                                                                                                                                                                                                                                                                                                                                                                                                                                                                                                                                        |
| Item                                                                                                                                                                                                                                                                                                                                                                                                                                                                                                                                                                                                                                                                                                                                                                                                                                                                                                                                                                                                                    | Mancante        | Errata                 | Corretta |        |     |     |         |     |     |        |    |     |      |    |     |         |     |     |                                                                                                                                                                                                                                                                                                                                                                                                                                                                                                                                                                                                                                                                                                                                                                                                                                                                                                                                                                                                 |      |          |        |          |      |      |       |       |      |      |       |       |      |      |      |       |                                                                                                                                                                                                                                                                                                                                                                                                                                                                                                                                                                                                                                                                                                                                                                                                                                                                                                                                                                                                                                        |
| D12a                                                                                                                                                                                                                                                                                                                                                                                                                                                                                                                                                                                                                                                                                                                                                                                                                                                                                                                                                                                                                    | 2,5%            | 22,0%                  | 75,5%    |        |     |     |         |     |     |        |    |     |      |    |     |         |     |     |                                                                                                                                                                                                                                                                                                                                                                                                                                                                                                                                                                                                                                                                                                                                                                                                                                                                                                                                                                                                 |      |          |        |          |      |      |       |       |      |      |       |       |      |      |      |       |                                                                                                                                                                                                                                                                                                                                                                                                                                                                                                                                                                                                                                                                                                                                                                                                                                                                                                                                                                                                                                        |
| D12b                                                                                                                                                                                                                                                                                                                                                                                                                                                                                                                                                                                                                                                                                                                                                                                                                                                                                                                                                                                                                    | 3,5%            | 35,2%                  | 61,3%    |        |     |     |         |     |     |        |    |     |      |    |     |         |     |     |                                                                                                                                                                                                                                                                                                                                                                                                                                                                                                                                                                                                                                                                                                                                                                                                                                                                                                                                                                                                 |      |          |        |          |      |      |       |       |      |      |       |       |      |      |      |       |                                                                                                                                                                                                                                                                                                                                                                                                                                                                                                                                                                                                                                                                                                                                                                                                                                                                                                                                                                                                                                        |
| D12c                                                                                                                                                                                                                                                                                                                                                                                                                                                                                                                                                                                                                                                                                                                                                                                                                                                                                                                                                                                                                    | 1,9%            | 7,9%                   | 90,2%    |        |     |     |         |     |     |        |    |     |      |    |     |         |     |     |                                                                                                                                                                                                                                                                                                                                                                                                                                                                                                                                                                                                                                                                                                                                                                                                                                                                                                                                                                                                 |      |          |        |          |      |      |       |       |      |      |       |       |      |      |      |       |                                                                                                                                                                                                                                                                                                                                                                                                                                                                                                                                                                                                                                                                                                                                                                                                                                                                                                                                                                                                                                        |

| Domanda                                                                                                                                                                                                                                                                                                                                                                                                                                        | Caratteristiche                                                                                                                                                                                                                                                                                                                                                                                                                                                                                                                                                                                                                                                                                                                                                                          | Descrizione e commento |          |       |      |   |   |     |      |       |       |       |      |                                                                                                                                                                                                                                                                                                                                                                                                                                                                                                                                     |
|------------------------------------------------------------------------------------------------------------------------------------------------------------------------------------------------------------------------------------------------------------------------------------------------------------------------------------------------------------------------------------------------------------------------------------------------|------------------------------------------------------------------------------------------------------------------------------------------------------------------------------------------------------------------------------------------------------------------------------------------------------------------------------------------------------------------------------------------------------------------------------------------------------------------------------------------------------------------------------------------------------------------------------------------------------------------------------------------------------------------------------------------------------------------------------------------------------------------------------------------|------------------------|----------|-------|------|---|---|-----|------|-------|-------|-------|------|-------------------------------------------------------------------------------------------------------------------------------------------------------------------------------------------------------------------------------------------------------------------------------------------------------------------------------------------------------------------------------------------------------------------------------------------------------------------------------------------------------------------------------------|
| <p><b>D13.</b> Per preparare la crema di ricotta occorre mescolare <math>\frac{2}{3}</math> di ricotta e <math>\frac{1}{3}</math> di zucchero. Il nonno usa 300 grammi di ricotta per preparare la crema. Quanti grammi di zucchero gli occorrono?</p> <p>A. <input type="checkbox"/> 100 grammi</p> <p>B. <input type="checkbox"/> 150 grammi</p> <p>C. <input type="checkbox"/> 200 grammi</p> <p>D. <input type="checkbox"/> 250 grammi</p> | <p><b>AMBITO PREVALENTE</b><br/>Relazioni e funzioni</p> <p><b>SCOPO DELLA DOMANDA</b><br/>Individuare il valore che soddisfa un determinato rapporto tra quantità.</p> <p><b>Indicazioni nazionali: TRAGUARDO</b><br/>Riconosce e utilizza rappresentazioni diverse di oggetti matematici (numeri decimali, frazioni, percentuali, scale di riduzione, ...).</p> <p><b>Indicazioni nazionali: OBIETTIVO</b><br/><i>Utilizzare numeri decimali, frazioni e percentuali per descrivere situazioni quotidiane.</i></p> <p><b>DIMENSIONE</b><br/>Conoscere</p> <p><b>RISULTATI DEL CAMPIONE</b></p> <table><tr><th>Item</th><th>Mancante</th><th>A</th><th>B</th><th>C</th><th>D</th></tr><tr><td>D13</td><td>1,9%</td><td>27,4%</td><td>43,4%</td><td>18,3%</td><td>9,0%</td></tr></table> | Item                   | Mancante | A     | B    | C | D | D13 | 1,9% | 27,4% | 43,4% | 18,3% | 9,0% | <p><b>Risposta corretta: B</b></p> <p>In un contesto che richiama una situazione reale, il quesito richiede di trovare una quantità mantenendo delle proporzioni date. L'opzione A si riferisce al calcolo di <math>\frac{1}{3}</math> (proporzione dello zucchero) dell'unica quantità di prodotto espressa esplicitamente nel testo (300 grammi). L'opzione C si riferisce al calcolo di <math>\frac{2}{3}</math> (proporzione della ricotta) dell'unica quantità di prodotto espressa esplicitamente nel testo (300 grammi).</p> |
| Item                                                                                                                                                                                                                                                                                                                                                                                                                                           | Mancante                                                                                                                                                                                                                                                                                                                                                                                                                                                                                                                                                                                                                                                                                                                                                                                 | A                      | B        | C     | D    |   |   |     |      |       |       |       |      |                                                                                                                                                                                                                                                                                                                                                                                                                                                                                                                                     |
| D13                                                                                                                                                                                                                                                                                                                                                                                                                                            | 1,9%                                                                                                                                                                                                                                                                                                                                                                                                                                                                                                                                                                                                                                                                                                                                                                                     | 27,4%                  | 43,4%    | 18,3% | 9,0% |   |   |     |      |       |       |       |      |                                                                                                                                                                                                                                                                                                                                                                                                                                                                                                                                     |



| Domanda                                                                                                                                                                                                | Caratteristiche                                                                                                                                                                                                                                                                                                                                                                                                                                                                                                                                                                                                                                                                                                                                          | Descrizione e commento |          |        |          |     |      |       |       |                                                                                                                                                                                                                                                                                                                                                                                                      |
|--------------------------------------------------------------------------------------------------------------------------------------------------------------------------------------------------------|----------------------------------------------------------------------------------------------------------------------------------------------------------------------------------------------------------------------------------------------------------------------------------------------------------------------------------------------------------------------------------------------------------------------------------------------------------------------------------------------------------------------------------------------------------------------------------------------------------------------------------------------------------------------------------------------------------------------------------------------------------|------------------------|----------|--------|----------|-----|------|-------|-------|------------------------------------------------------------------------------------------------------------------------------------------------------------------------------------------------------------------------------------------------------------------------------------------------------------------------------------------------------------------------------------------------------|
| <p>D14. Osserva il poligono grigio. Due lati sono paralleli.</p> 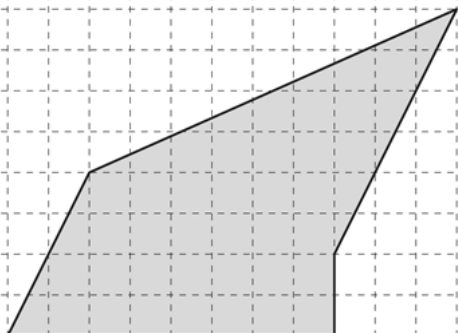 <p>Segna con una crocetta i due lati paralleli.</p> | <p><b>AMBITO PREVALENTE</b><br/>Spazio figure</p> <p><b>SCOPO DELLA DOMANDA</b><br/>Individuare in una figura due lati paralleli.</p> <p><b>Indicazioni nazionali: TRAGUARDO</b><br/>Descrive, denomina e classifica figure in base a caratteristiche geometriche, ne determina misure, progetta e costruisce modelli concreti di vario tipo.</p> <p><b>Indicazioni nazionali: OBIETTIVO</b><br/><i>Utilizzare e distinguere fra loro i concetti di perpendicolarità, parallelismo, orizzontalità, verticalità.</i></p> <p><b>DIMENSIONE</b><br/>Conoscere</p> <p><b>RISULTATI DEL CAMPIONE</b></p> <table><tr><th>Item</th><th>Mancante</th><th>Errata</th><th>Corretta</th></tr><tr><td>D14</td><td>6,3%</td><td>58,5%</td><td>35,2%</td></tr></table> | Item                   | Mancante | Errata | Corretta | D14 | 6,3% | 58,5% | 35,2% | <p><b>Risposta corretta:</b></p> 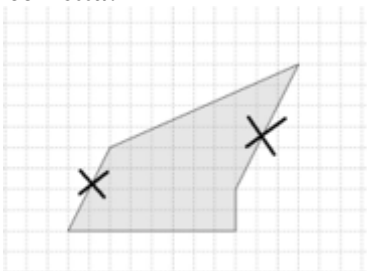 <p>Il quesito richiede di individuare in un pentagono non regolare due lati paralleli di diversa lunghezza. L'individuazione dei due lati paralleli è agevolata dalla regolarità (ortogonale e monometrica) del quadrettato che permette di identificare pendenze costanti.</p> |
| Item                                                                                                                                                                                                   | Mancante                                                                                                                                                                                                                                                                                                                                                                                                                                                                                                                                                                                                                                                                                                                                                 | Errata                 | Corretta |        |          |     |      |       |       |                                                                                                                                                                                                                                                                                                                                                                                                      |
| D14                                                                                                                                                                                                    | 6,3%                                                                                                                                                                                                                                                                                                                                                                                                                                                                                                                                                                                                                                                                                                                                                     | 58,5%                  | 35,2%    |        |          |     |      |       |       |                                                                                                                                                                                                                                                                                                                                                                                                      |

| Domanda                                                                                                                                                                                                                                                                                                          | Caratteristiche                                                                                                                                                                                                                                                                                                                                                                                                                                                                                                                                                                                                                                                                                                                                                                                                                          | Descrizione e commento |          |        |          |     |      |       |       |                                                                                                                                                                                                                                                                                                                                                                                                                                                                                                                                                                                                                                                                                                                       |
|------------------------------------------------------------------------------------------------------------------------------------------------------------------------------------------------------------------------------------------------------------------------------------------------------------------|------------------------------------------------------------------------------------------------------------------------------------------------------------------------------------------------------------------------------------------------------------------------------------------------------------------------------------------------------------------------------------------------------------------------------------------------------------------------------------------------------------------------------------------------------------------------------------------------------------------------------------------------------------------------------------------------------------------------------------------------------------------------------------------------------------------------------------------|------------------------|----------|--------|----------|-----|------|-------|-------|-----------------------------------------------------------------------------------------------------------------------------------------------------------------------------------------------------------------------------------------------------------------------------------------------------------------------------------------------------------------------------------------------------------------------------------------------------------------------------------------------------------------------------------------------------------------------------------------------------------------------------------------------------------------------------------------------------------------------|
| <p><b>D15.</b> Il 15 gennaio 2015 a Monteveglio, alle 8 del mattino, la temperatura era di 5 gradi.</p> <p>Il giorno dopo, alla stessa ora, la temperatura era diminuita di 7 gradi.</p> <p>Qual era la temperatura a Monteveglio il 16 gennaio 2015 alle 8 del mattino?</p> <p><b>Risposta:</b> ..... gradi</p> | <p><b>AMBITO PREVALENTE</b><br/>Numeri</p> <p><b>SCOPO DELLA DOMANDA</b><br/>Operare con numeri interi (positivi e negativi) per calcolare una differenza di temperatura.</p> <p><b>Indicazioni nazionali: TRAGUARDO</b><br/>Riesce a risolvere facili problemi in tutti gli ambiti di contenuto, mantenendo il controllo sia sul processo risolutivo, sia sui risultati. Descrive il procedimento seguito e riconosce strategie di soluzione diverse dalla propria.</p> <p><b>Indicazioni nazionali: OBIETTIVO</b><br/><i>Interpretare i numeri interi negativi in contesti concreti.</i></p> <p><b>DIMENSIONE</b><br/>Risolvere problemi</p> <p><b>RISULTATI DEL CAMPIONE</b></p> <table><tr><th>Item</th><th>Mancante</th><th>Errata</th><th>Corretta</th></tr><tr><td>D15</td><td>3,5%</td><td>26,4%</td><td>70,1%</td></tr></table> | Item                   | Mancante | Errata | Corretta | D15 | 3,5% | 26,4% | 70,1% | <p><b>Risposta corretta: - 2</b></p> <p>Il quesito richiede di calcolare la temperatura finale registrata in un dato periodo di tempo dopo aver individuato, tra i diversi dati numerici presenti nel testo del problema, quelli relativi al valore della temperatura registrato inizialmente e alla sua variazione nel periodo di tempo indicato. Lo studente è chiamato ad operare con numeri interi.</p> <p>Un possibile errore potrebbe essere quello di omettere il segno meno davanti al numero 2.</p> <p>Un altro possibile errore potrebbe essere quello di indicare come risultato il numero -7 interpretando la diminuzione rispetto a 0 piuttosto che rispetto alla temperatura del giorno precedente.</p> |
| Item                                                                                                                                                                                                                                                                                                             | Mancante                                                                                                                                                                                                                                                                                                                                                                                                                                                                                                                                                                                                                                                                                                                                                                                                                                 | Errata                 | Corretta |        |          |     |      |       |       |                                                                                                                                                                                                                                                                                                                                                                                                                                                                                                                                                                                                                                                                                                                       |
| D15                                                                                                                                                                                                                                                                                                              | 3,5%                                                                                                                                                                                                                                                                                                                                                                                                                                                                                                                                                                                                                                                                                                                                                                                                                                     | 26,4%                  | 70,1%    |        |          |     |      |       |       |                                                                                                                                                                                                                                                                                                                                                                                                                                                                                                                                                                                                                                                                                                                       |

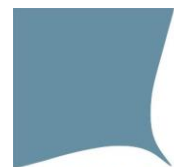

| Domanda                                                                                                                                                                                                                                                           | Caratteristiche                                                                                                                                                                                                                                                                                                                                                                                                                                                                                                                                                                                                                                                                                                                                                     | Descrizione e commento |          |        |          |     |      |       |       |                                                                                                                                                                                                                                                                                                                                                                                                 |
|-------------------------------------------------------------------------------------------------------------------------------------------------------------------------------------------------------------------------------------------------------------------|---------------------------------------------------------------------------------------------------------------------------------------------------------------------------------------------------------------------------------------------------------------------------------------------------------------------------------------------------------------------------------------------------------------------------------------------------------------------------------------------------------------------------------------------------------------------------------------------------------------------------------------------------------------------------------------------------------------------------------------------------------------------|------------------------|----------|--------|----------|-----|------|-------|-------|-------------------------------------------------------------------------------------------------------------------------------------------------------------------------------------------------------------------------------------------------------------------------------------------------------------------------------------------------------------------------------------------------|
| <p>D16. Osserva la seguente figura: è un quadrato composto da sette poligoni.</p> 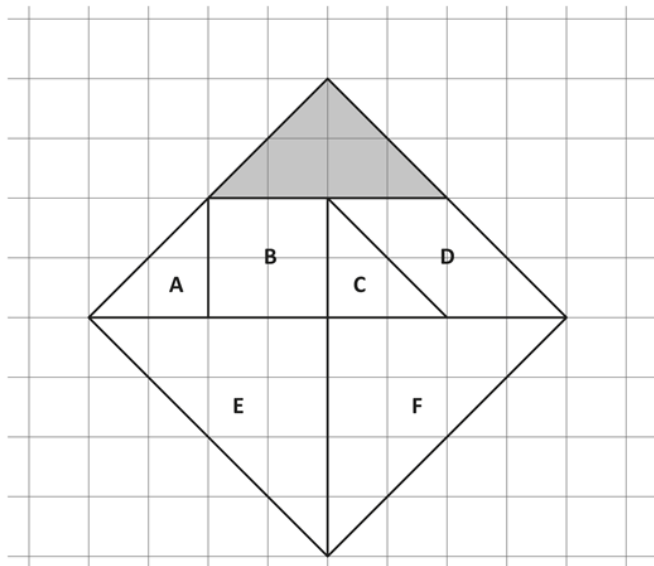 <p>Segna con una crocetta i poligoni che hanno area uguale a quella del poligono grigio.</p> | <p><b>AMBITO PREVALENTE</b><br/>Spazio figure</p> <p><b>SCOPO DELLA DOMANDA</b><br/>In un tangram individuare poligoni equiestesi.</p> <p><b>Indicazioni nazionali: TRAGUARDO</b><br/>Descrive, denomina e classifica figure in base a caratteristiche geometriche, ne determina misure, progetta e costruisce modelli concreti di vario tipo.</p> <p><b>Indicazioni nazionali: OBIETTIVO</b><br/><i>Determinare l'area di rettangoli e triangoli e di altre figure per scomposizione o utilizzando le più comuni formule.</i></p> <p><b>DIMENSIONE</b><br/>Conoscere</p> <p><b>RISULTATI DEL CAMPIONE</b></p> <table><tr><th>Item</th><th>Mancante</th><th>Errata</th><th>Corretta</th></tr><tr><td>D16</td><td>7,4%</td><td>47,3%</td><td>45,3%</td></tr></table> | Item                   | Mancante | Errata | Corretta | D16 | 7,4% | 47,3% | 45,3% | <p><b>Risposta corretta:</b></p> 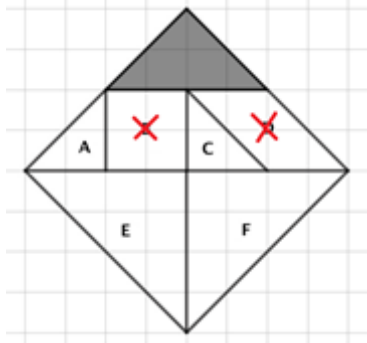 <p>Il quesito richiede di individuare poligoni equiestesi, ma non congruenti mediante scomposizione di figure.<br/>Un possibile errore potrebbe essere quello di indicare i triangoli A e C perché la somma delle loro aree corrisponde all'area del triangolo grigio.</p> |
| Item                                                                                                                                                                                                                                                              | Mancante                                                                                                                                                                                                                                                                                                                                                                                                                                                                                                                                                                                                                                                                                                                                                            | Errata                 | Corretta |        |          |     |      |       |       |                                                                                                                                                                                                                                                                                                                                                                                                 |
| D16                                                                                                                                                                                                                                                               | 7,4%                                                                                                                                                                                                                                                                                                                                                                                                                                                                                                                                                                                                                                                                                                                                                                | 47,3%                  | 45,3%    |        |          |     |      |       |       |                                                                                                                                                                                                                                                                                                                                                                                                 |

| Domanda                                                                                                         | Caratteristiche                                                                                                                                                                                                                                                                                                                                                                                                                                                                                                                                                                                                                                                                                                                                                                                                      | Descrizione e commento |          |        |          |     |       |       |       |                                                                                                                                                                                                                                                                                                                                                                                                          |
|-----------------------------------------------------------------------------------------------------------------|----------------------------------------------------------------------------------------------------------------------------------------------------------------------------------------------------------------------------------------------------------------------------------------------------------------------------------------------------------------------------------------------------------------------------------------------------------------------------------------------------------------------------------------------------------------------------------------------------------------------------------------------------------------------------------------------------------------------------------------------------------------------------------------------------------------------|------------------------|----------|--------|----------|-----|-------|-------|-------|----------------------------------------------------------------------------------------------------------------------------------------------------------------------------------------------------------------------------------------------------------------------------------------------------------------------------------------------------------------------------------------------------------|
| <p>D17. Inserisci un numero al posto dei puntini in modo che l'uguaglianza sia vera.</p> <p>..... x 8 = 3,2</p> | <p><b>AMBITO PREVALENTE</b><br/>Numeri</p> <p><b>SCOPO DELLA DOMANDA</b><br/>Trovare un numero che rende vera un'uguaglianza dove è presente una moltiplicazione con un fattore razionale compreso tra 0 e 1.</p> <p><b>Indicazioni nazionali: TRAGUARDO</b><br/>L'alunno si muove con sicurezza nel calcolo scritto e mentale con i numeri naturali e sa valutare l'opportunità di ricorrere a una calcolatrice.</p> <p><b>Indicazioni nazionali: OBIETTIVO</b><br/><i>Eseguire la divisione con resto fra numeri naturali; individuare multipli e divisori di un numero.</i></p> <p><b>DIMENSIONE</b><br/>Conoscere</p> <p><b>RISULTATI DEL CAMPIONE</b></p> <table><tr><th>Item</th><th>Mancante</th><th>Errata</th><th>Corretta</th></tr><tr><td>D17</td><td>12,1%</td><td>28,6%</td><td>59,3%</td></tr></table> | Item                   | Mancante | Errata | Corretta | D17 | 12,1% | 28,6% | 59,3% | <p><b>Risposta corretta: 0,4</b></p> <p>Il quesito richiede di individuare il fattore incognito di una moltiplicazione che ha come prodotto un numero razionale minore dell'unico fattore indicato.</p> <p>Un possibile errore potrebbe essere quello di scrivere il numero 4 non tenendo conto del fatto che il fattore mancante deve essere necessariamente un numero maggiore di 0 e minore di 1.</p> |
| Item                                                                                                            | Mancante                                                                                                                                                                                                                                                                                                                                                                                                                                                                                                                                                                                                                                                                                                                                                                                                             | Errata                 | Corretta |        |          |     |       |       |       |                                                                                                                                                                                                                                                                                                                                                                                                          |
| D17                                                                                                             | 12,1%                                                                                                                                                                                                                                                                                                                                                                                                                                                                                                                                                                                                                                                                                                                                                                                                                | 28,6%                  | 59,3%    |        |          |     |       |       |       |                                                                                                                                                                                                                                                                                                                                                                                                          |



| Domanda                                                                                                                                                                                                                                                                                                                                                                                                                                                                                                                                                                                                                                                                                                                                                  | Caratteristiche     | Descrizione e commento |           |           |           |           |           |           |           |            |            |  |           |           |           |           |           |           |           |           |           |           |            |            |       |       |       |        |        |        |        |        |        |        |        |        |                                                                                                                                                                                                                                                                                                                                                                                                                                                                                                                                                                                                                                                                                                                                                                                                                                                               |      |          |        |          |     |      |       |       |                                                                                                                                                                                                                                                                                                                                                                                                                                                                                                                                                          |
|----------------------------------------------------------------------------------------------------------------------------------------------------------------------------------------------------------------------------------------------------------------------------------------------------------------------------------------------------------------------------------------------------------------------------------------------------------------------------------------------------------------------------------------------------------------------------------------------------------------------------------------------------------------------------------------------------------------------------------------------------------|---------------------|------------------------|-----------|-----------|-----------|-----------|-----------|-----------|-----------|------------|------------|--|-----------|-----------|-----------|-----------|-----------|-----------|-----------|-----------|-----------|-----------|------------|------------|-------|-------|-------|--------|--------|--------|--------|--------|--------|--------|--------|--------|---------------------------------------------------------------------------------------------------------------------------------------------------------------------------------------------------------------------------------------------------------------------------------------------------------------------------------------------------------------------------------------------------------------------------------------------------------------------------------------------------------------------------------------------------------------------------------------------------------------------------------------------------------------------------------------------------------------------------------------------------------------------------------------------------------------------------------------------------------------|------|----------|--------|----------|-----|------|-------|-------|----------------------------------------------------------------------------------------------------------------------------------------------------------------------------------------------------------------------------------------------------------------------------------------------------------------------------------------------------------------------------------------------------------------------------------------------------------------------------------------------------------------------------------------------------------|
| <p>D18. Domenico una volta all’anno va dal pediatra che misura la sua altezza.</p> <table><tr><th colspan="12">Altezza di Domenico</th></tr><tr><th>0<br/>anni</th><th>1<br/>anno</th><th>2<br/>anni</th><th>3<br/>anni</th><th>4<br/>anni</th><th>5<br/>anni</th><th>6<br/>anni</th><th>7<br/>anni</th><th>8<br/>anni</th><th>9<br/>anni</th><th>10<br/>anni</th><th>11<br/>anni</th></tr><tr><td>55 cm</td><td>78 cm</td><td>92 cm</td><td>100 cm</td><td>109 cm</td><td>115 cm</td><td>123 cm</td><td>130 cm</td><td>132 cm</td><td>136 cm</td><td>140 cm</td><td>145 cm</td></tr></table> <p>Nel grafico sono riportate alcune altezze.</p> <p>Completa il grafico con le tre altezze mancanti.</p> <div><p>Altezza di Domenico negli anni</p></div> | Altezza di Domenico |                        |           |           |           |           |           |           |           |            |            |  | 0<br>anni | 1<br>anno | 2<br>anni | 3<br>anni | 4<br>anni | 5<br>anni | 6<br>anni | 7<br>anni | 8<br>anni | 9<br>anni | 10<br>anni | 11<br>anni | 55 cm | 78 cm | 92 cm | 100 cm | 109 cm | 115 cm | 123 cm | 130 cm | 132 cm | 136 cm | 140 cm | 145 cm | <p><b>AMBITO PREVALENTE</b><br/>Dati e previsioni</p> <p><b>SCOPO DELLA DOMANDA</b><br/>Completare un grafico utilizzando le informazioni fornite in una tabella.</p> <p><b>Indicazioni nazionali: TRAGUARDO</b><br/>Ricerca dati per ricavare informazioni e costruisce rappresentazioni (tabelle e grafici). Ricava informazioni anche da dati rappresentati in tabelle e grafici.</p> <p><b>Indicazioni nazionali: OBIETTIVO</b><br/><i>Rappresentare relazioni e dati e, in situazioni significative, utilizzare le rappresentazioni per ricavare informazioni, formulare giudizi e prendere decisioni.</i></p> <p><b>DIMENSIONE</b><br/>Risolvere problemi</p> <p><b>RISULTATI DEL CAMPIONE</b></p> <table><tr><th>Item</th><th>Mancante</th><th>Errata</th><th>Corretta</th></tr><tr><td>D18</td><td>7,3%</td><td>13,4%</td><td>79,3%</td></tr></table> | Item | Mancante | Errata | Corretta | D18 | 7,3% | 13,4% | 79,3% | <p><b>Risposta corretta:</b></p> <div><p>Altezza di Domenico negli anni</p></div> <p>Il quesito richiede di completare un grafico in cui sono rappresentate le età e le altezze di un bambino, ricavando i dati dalla tabella presente nello stimolo della domanda. Lo studente deve necessariamente consultare la tabella per ricavare le informazioni necessarie per passare dalla forma di rappresentazione tabulare a quella grafica, individuando quali dati nel grafico sono mancanti e poi disegnando nella posizione corretta questi valori.</p> |
| Altezza di Domenico                                                                                                                                                                                                                                                                                                                                                                                                                                                                                                                                                                                                                                                                                                                                      |                     |                        |           |           |           |           |           |           |           |            |            |  |           |           |           |           |           |           |           |           |           |           |            |            |       |       |       |        |        |        |        |        |        |        |        |        |                                                                                                                                                                                                                                                                                                                                                                                                                                                                                                                                                                                                                                                                                                                                                                                                                                                               |      |          |        |          |     |      |       |       |                                                                                                                                                                                                                                                                                                                                                                                                                                                                                                                                                          |
| 0<br>anni                                                                                                                                                                                                                                                                                                                                                                                                                                                                                                                                                                                                                                                                                                                                                | 1<br>anno           | 2<br>anni              | 3<br>anni | 4<br>anni | 5<br>anni | 6<br>anni | 7<br>anni | 8<br>anni | 9<br>anni | 10<br>anni | 11<br>anni |  |           |           |           |           |           |           |           |           |           |           |            |            |       |       |       |        |        |        |        |        |        |        |        |        |                                                                                                                                                                                                                                                                                                                                                                                                                                                                                                                                                                                                                                                                                                                                                                                                                                                               |      |          |        |          |     |      |       |       |                                                                                                                                                                                                                                                                                                                                                                                                                                                                                                                                                          |
| 55 cm                                                                                                                                                                                                                                                                                                                                                                                                                                                                                                                                                                                                                                                                                                                                                    | 78 cm               | 92 cm                  | 100 cm    | 109 cm    | 115 cm    | 123 cm    | 130 cm    | 132 cm    | 136 cm    | 140 cm     | 145 cm     |  |           |           |           |           |           |           |           |           |           |           |            |            |       |       |       |        |        |        |        |        |        |        |        |        |                                                                                                                                                                                                                                                                                                                                                                                                                                                                                                                                                                                                                                                                                                                                                                                                                                                               |      |          |        |          |     |      |       |       |                                                                                                                                                                                                                                                                                                                                                                                                                                                                                                                                                          |
| Item                                                                                                                                                                                                                                                                                                                                                                                                                                                                                                                                                                                                                                                                                                                                                     | Mancante            | Errata                 | Corretta  |           |           |           |           |           |           |            |            |  |           |           |           |           |           |           |           |           |           |           |            |            |       |       |       |        |        |        |        |        |        |        |        |        |                                                                                                                                                                                                                                                                                                                                                                                                                                                                                                                                                                                                                                                                                                                                                                                                                                                               |      |          |        |          |     |      |       |       |                                                                                                                                                                                                                                                                                                                                                                                                                                                                                                                                                          |
| D18                                                                                                                                                                                                                                                                                                                                                                                                                                                                                                                                                                                                                                                                                                                                                      | 7,3%                | 13,4%                  | 79,3%     |           |           |           |           |           |           |            |            |  |           |           |           |           |           |           |           |           |           |           |            |            |       |       |       |        |        |        |        |        |        |        |        |        |                                                                                                                                                                                                                                                                                                                                                                                                                                                                                                                                                                                                                                                                                                                                                                                                                                                               |      |          |        |          |     |      |       |       |                                                                                                                                                                                                                                                                                                                                                                                                                                                                                                                                                          |

| Domanda                                                                                                                                                                                                                                                                                                                                                 | Caratteristiche                                                                                                                                                                                                                                                                                                                                                                                                                                                                                                                                                                                                            | Descrizione e commento |          |        |          |     |      |       |       |                                                                                                                                                                                                                                                                                                                                                                                                                                                                                                                                                                                                                                                                                                                                                                                                                                              |
|---------------------------------------------------------------------------------------------------------------------------------------------------------------------------------------------------------------------------------------------------------------------------------------------------------------------------------------------------------|----------------------------------------------------------------------------------------------------------------------------------------------------------------------------------------------------------------------------------------------------------------------------------------------------------------------------------------------------------------------------------------------------------------------------------------------------------------------------------------------------------------------------------------------------------------------------------------------------------------------------|------------------------|----------|--------|----------|-----|------|-------|-------|----------------------------------------------------------------------------------------------------------------------------------------------------------------------------------------------------------------------------------------------------------------------------------------------------------------------------------------------------------------------------------------------------------------------------------------------------------------------------------------------------------------------------------------------------------------------------------------------------------------------------------------------------------------------------------------------------------------------------------------------------------------------------------------------------------------------------------------------|
| <p>D19. Laura dice:</p> <p>“Se moltiplichi per 2 un numero naturale e dal risultato sottrai 1, ottieni sempre un numero pari”.</p> <p>Laura ha ragione?</p> <p><input type="checkbox"/> Sì, Laura ha ragione perché .....</p> <p>.....</p> <p>.....</p> <p><input type="checkbox"/> No, Laura non ha ragione perché .....</p> <p>.....</p> <p>.....</p> | <p><b>AMBITO PREVALENTE</b></p> <p>Numeri</p> <p><b>SCOPO DELLA DOMANDA</b></p> <p>Riconoscere se una affermazione sulle proprietà dei numeri (doppio di un numero, precedente di un numero, pari/dispari) è vera o falsa e dare una giustificazione.</p> <p><b>Indicazioni nazionali: TRAGUARDO</b></p> <p>Legge e comprende testi che coinvolgono aspetti logici e matematici.</p> <p><b>DIMENSIONE</b></p> <p>Argomentare</p> <p><b>RISULTATI DEL CAMPIONE</b></p> <table><tr><th>Item</th><th>Mancante</th><th>Errata</th><th>Corretta</th></tr><tr><td>D19</td><td>9,3%</td><td>30,1%</td><td>60,6%</td></tr></table> | Item                   | Mancante | Errata | Corretta | D19 | 9,3% | 30,1% | 60,6% | <p><b>Risposta corretta:</b></p> <p>No perché.....Sono corrette tutte le risposte in cui viene fornito un controesempio.</p> <p><b>Esempi di risposta corretta:</b></p> <p>se moltiplico 3 x 2 e sottraggo 1 ottengo 5, che è un numero dispari.</p> <p>il doppio di un numero è sempre pari e togliendo 1 da un numero pari si ottiene un numero dispari.</p> <p>Il quesito richiede di verificare una affermazione sulle proprietà dei numeri naturali e di motivare la propria risposta. È necessario conoscere il significato del termine pari e comprendere la procedura descritta a parole nel testo del quesito, oltre al significato della parola “sempre”.</p> <p>Un possibile errore potrebbe essere dovuto ad una lettura parziale del testo e quindi alla considerazione della sola operazione di moltiplicazione descritta.</p> |
| Item                                                                                                                                                                                                                                                                                                                                                    | Mancante                                                                                                                                                                                                                                                                                                                                                                                                                                                                                                                                                                                                                   | Errata                 | Corretta |        |          |     |      |       |       |                                                                                                                                                                                                                                                                                                                                                                                                                                                                                                                                                                                                                                                                                                                                                                                                                                              |
| D19                                                                                                                                                                                                                                                                                                                                                     | 9,3%                                                                                                                                                                                                                                                                                                                                                                                                                                                                                                                                                                                                                       | 30,1%                  | 60,6%    |        |          |     |      |       |       |                                                                                                                                                                                                                                                                                                                                                                                                                                                                                                                                                                                                                                                                                                                                                                                                                                              |



| Domanda                                                                                                                                                                                                                                                                                                                                                                                                                                                                                                                                                                                                                                                             | Caratteristiche                                                                                                                                                                                                                                                                                                                                                                                                                                                                                                                                                                                                                                                                                                                                                                                                                                                                                             | Descrizione e commento |          |      |       |   |   |     |      |       |       |      |       |                                                                                                                                                                                                                                                                                                                                                                                                                                                                                                                                                                                                                                                                                                                                                     |
|---------------------------------------------------------------------------------------------------------------------------------------------------------------------------------------------------------------------------------------------------------------------------------------------------------------------------------------------------------------------------------------------------------------------------------------------------------------------------------------------------------------------------------------------------------------------------------------------------------------------------------------------------------------------|-------------------------------------------------------------------------------------------------------------------------------------------------------------------------------------------------------------------------------------------------------------------------------------------------------------------------------------------------------------------------------------------------------------------------------------------------------------------------------------------------------------------------------------------------------------------------------------------------------------------------------------------------------------------------------------------------------------------------------------------------------------------------------------------------------------------------------------------------------------------------------------------------------------|------------------------|----------|------|-------|---|---|-----|------|-------|-------|------|-------|-----------------------------------------------------------------------------------------------------------------------------------------------------------------------------------------------------------------------------------------------------------------------------------------------------------------------------------------------------------------------------------------------------------------------------------------------------------------------------------------------------------------------------------------------------------------------------------------------------------------------------------------------------------------------------------------------------------------------------------------------------|
| <p><b>D20. A uno spettacolo teatrale sono presenti 96 spettatori.</b></p> <p><b>Gli uomini sono 16 più delle donne.</b></p> <p><b>Osserva la rappresentazione grafica della situazione.</b></p> <div><div><div>UOMINI</div><div><div></div><div>16</div></div></div><div><div>DONNE</div><div><div></div></div></div></div> <p><b>Quante sono le donne?</b></p> <div><div>A.</div><div><input type="checkbox"/></div><div>32</div></div> <div><div>B.</div><div><input type="checkbox"/></div><div>40</div></div> <div><div>C.</div><div><input type="checkbox"/></div><div>56</div></div> <div><div>D.</div><div><input type="checkbox"/></div><div>80</div></div> | <p><b>AMBITO PREVALENTE</b></p> <p>Relazioni e funzioni</p> <p><b>SCOPO DELLA DOMANDA</b></p> <p>Risolvere una situazione problematica in cui, descritta una certa relazione tra due parti di un tutto si richiede di calcolare il valore numerico di ciascuna parte, tenendo conto anche della rappresentazione grafica.</p> <p><b>Indicazioni nazionali: TRAGUARDO</b></p> <p>Riesce a risolvere facili problemi in tutti gli ambiti di contenuto, mantenendo il controllo sia sul processo risolutivo, sia sui risultati. Descrive il procedimento seguito e riconosce strategie di soluzione diverse dalla propria.</p> <p><b>DIMENSIONE</b></p> <p>Risolvere problemi</p> <p><b>RISULTATI DEL CAMPIONE</b></p> <table><tr><th>Item</th><th>Mancante</th><th>A</th><th>B</th><th>C</th><th>D</th></tr><tr><td>D20</td><td>1,1%</td><td>19,5%</td><td>42,3%</td><td>5,6%</td><td>31,5%</td></tr></table> | Item                   | Mancante | A    | B     | C | D | D20 | 1,1% | 19,5% | 42,3% | 5,6% | 31,5% | <p><b>Risposta corretta: B</b></p> <p>Il quesito chiede di individuare, tra 4 possibili valori, quello che soddisfa una relazione tra quantità descritte in un testo verbale e anche attraverso una rappresentazione grafica.</p> <p>L’opzione A è relativa a un approccio percettivo: il segmento grigio chiaro relativo al 16 potrebbe sembrare 1/3 di tutto il segmento relativo agli uomini, quindi le donne risultano 32 poiché corrispondenti ai 2/3.</p> <p>L’opzione C può intercettare coloro che individuano il numero degli uomini anziché quello delle donne.</p> <p>L’opzione D può intercettare gli alunni che utilizzano solo i dati numerici scritti nel testo e sottraggono ai 96 spettatori i 16 uomini “in più” delle donne.</p> |
| Item                                                                                                                                                                                                                                                                                                                                                                                                                                                                                                                                                                                                                                                                | Mancante                                                                                                                                                                                                                                                                                                                                                                                                                                                                                                                                                                                                                                                                                                                                                                                                                                                                                                    | A                      | B        | C    | D     |   |   |     |      |       |       |      |       |                                                                                                                                                                                                                                                                                                                                                                                                                                                                                                                                                                                                                                                                                                                                                     |
| D20                                                                                                                                                                                                                                                                                                                                                                                                                                                                                                                                                                                                                                                                 | 1,1%                                                                                                                                                                                                                                                                                                                                                                                                                                                                                                                                                                                                                                                                                                                                                                                                                                                                                                        | 19,5%                  | 42,3%    | 5,6% | 31,5% |   |   |     |      |       |       |      |       |                                                                                                                                                                                                                                                                                                                                                                                                                                                                                                                                                                                                                                                                                                                                                     |

| Domanda                                                                                                                                                                                                                                                                                                                                                                                                                        | Caratteristiche                                                                                                                                                                                                                                                                                                                                                                                                                                                                                                                                                                                                                                                                                                                                                        | Descrizione e commento |          |        |          |     |      |       |       |                                                                                                                                                                                                                                                                                                                                                                                                                                                                                                                                                                                                                                                    |
|--------------------------------------------------------------------------------------------------------------------------------------------------------------------------------------------------------------------------------------------------------------------------------------------------------------------------------------------------------------------------------------------------------------------------------|------------------------------------------------------------------------------------------------------------------------------------------------------------------------------------------------------------------------------------------------------------------------------------------------------------------------------------------------------------------------------------------------------------------------------------------------------------------------------------------------------------------------------------------------------------------------------------------------------------------------------------------------------------------------------------------------------------------------------------------------------------------------|------------------------|----------|--------|----------|-----|------|-------|-------|----------------------------------------------------------------------------------------------------------------------------------------------------------------------------------------------------------------------------------------------------------------------------------------------------------------------------------------------------------------------------------------------------------------------------------------------------------------------------------------------------------------------------------------------------------------------------------------------------------------------------------------------------|
| <p>D21. Osserva la figura in cui sono rappresentate sei bandierine con le aste che si incontrano tutte nel punto O. Gli angoli compresi tra due aste consecutive hanno tutti la stessa ampiezza.</p> 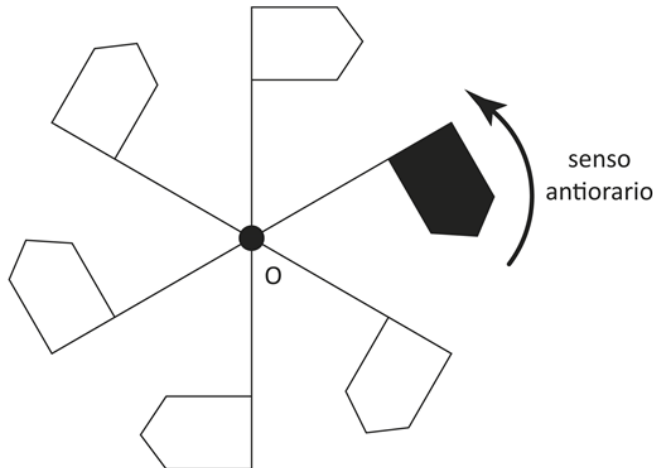 <p>senso antiorario</p> <p>Segna con una crocetta la bandierina che si trova a 120° in senso antiorario da quella colorata di nero.</p> | <p><b>AMBITO PREVALENTE</b><br/>Spazio figure</p> <p><b>SCOPO DELLA DOMANDA</b><br/>In una figura data individuare l'angolo di una determinata ampiezza rispettando delle condizioni date.</p> <p><b>Indicazioni nazionali: TRAGUARDO</b><br/>Descrive, denomina e classifica figure in base a caratteristiche geometriche, ne determina misure, progetta e costruisce modelli concreti di vario tipo.</p> <p><b>Indicazioni nazionali: OBIETTIVO</b><br/><i>Confrontare e misurare angoli utilizzando proprietà e strumenti.</i></p> <p><b>DIMENSIONE</b><br/>Conoscere</p> <p><b>RISULTATI DEL CAMPIONE</b></p> <table><tr><th>Item</th><th>Mancante</th><th>Errata</th><th>Corretta</th></tr><tr><td>D21</td><td>6,4%</td><td>40,0%</td><td>53,6%</td></tr></table> | Item                   | Mancante | Errata | Corretta | D21 | 6,4% | 40,0% | 53,6% | <p><b>Risposta corretta:</b></p> 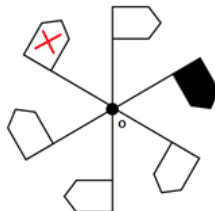 <p>Il quesito richiede di riconoscere che la misura dell'angolo compreso tra due aste consecutive è di 60° e quindi individuare la posizione della bandierina che si trova a 120° in senso antiorario rispetto a quella nera.</p> <p>Possibili errori potrebbero essere:</p> <ul style="list-style-type: none"><li>- invertire il senso di rotazione</li><li>- indicare la bandierina che si trova a 180° da quella colorata in nero</li><li>- segnare la bandierina che si trova a 60° da quella colorata di nero.</li></ul> |
| Item                                                                                                                                                                                                                                                                                                                                                                                                                           | Mancante                                                                                                                                                                                                                                                                                                                                                                                                                                                                                                                                                                                                                                                                                                                                                               | Errata                 | Corretta |        |          |     |      |       |       |                                                                                                                                                                                                                                                                                                                                                                                                                                                                                                                                                                                                                                                    |
| D21                                                                                                                                                                                                                                                                                                                                                                                                                            | 6,4%                                                                                                                                                                                                                                                                                                                                                                                                                                                                                                                                                                                                                                                                                                                                                                   | 40,0%                  | 53,6%    |        |          |     |      |       |       |                                                                                                                                                                                                                                                                                                                                                                                                                                                                                                                                                                                                                                                    |



| Domanda                                                                                                                                                                                         | Caratteristiche                                                                                                                                                                                                                                                                                                                                                                                                                                                                                                                                                                                | Descrizione e commento |              |        |          |            |      |       |              |                                                                                                                                                                                                                                                                                                                                                                                                                                                                                                                                                                                                 |
|-------------------------------------------------------------------------------------------------------------------------------------------------------------------------------------------------|------------------------------------------------------------------------------------------------------------------------------------------------------------------------------------------------------------------------------------------------------------------------------------------------------------------------------------------------------------------------------------------------------------------------------------------------------------------------------------------------------------------------------------------------------------------------------------------------|------------------------|--------------|--------|----------|------------|------|-------|--------------|-------------------------------------------------------------------------------------------------------------------------------------------------------------------------------------------------------------------------------------------------------------------------------------------------------------------------------------------------------------------------------------------------------------------------------------------------------------------------------------------------------------------------------------------------------------------------------------------------|
| <p><b>D22. In una classe c'è una femmina ogni due maschi.</b></p> <p><b>La classe è formata da 18 alunni in totale.</b></p> <p><b>Quante sono le femmine?</b></p> <p><b>Risposta: .....</b></p> | <p><b>AMBITO PREVALENTE</b><br/>Relazioni e funzioni</p> <p><b>SCOPO DELLA DOMANDA</b><br/>Descritta una relazione di proporzionalità tra due tipi di elementi calcolare il valore di uno di essi dato il totale.</p> <p><b>Indicazioni nazionali: TRAGUARDO</b><br/>Legge e comprende testi che coinvolgono aspetti logici e matematici.</p> <p><b>DIMENSIONE</b><br/>Argomentare</p> <p><b>RISULTATI DEL CAMPIONE</b></p> <table><tr><th>Item</th><th>Mancante</th><th>Errata</th><th>Corretta</th></tr><tr><td><b>D22</b></td><td>3,6%</td><td>39,6%</td><td><b>56,8%</b></td></tr></table> | Item                   | Mancante     | Errata | Corretta | <b>D22</b> | 3,6% | 39,6% | <b>56,8%</b> | <p><b>Risposta corretta: 6</b></p> <p>Il quesito richiede di interpretare l'espressione “una femmina ogni 2 maschi” e utilizzare questa relazione, insieme alla conoscenza del numero totale degli alunni, per individuare il numero delle femmine. Lo studente potrebbe procedere ragionando sui rapporti tra le quantità (1/3 di femmine e 2/3 di maschi) e anche utilizzando rappresentazioni grafiche, che supportano il controllo della relazione e del processo risolutivo. Un possibile errore potrebbe essere indicare 9 se l'espressione “ogni due” viene interpreta come la metà.</p> |
| Item                                                                                                                                                                                            | Mancante                                                                                                                                                                                                                                                                                                                                                                                                                                                                                                                                                                                       | Errata                 | Corretta     |        |          |            |      |       |              |                                                                                                                                                                                                                                                                                                                                                                                                                                                                                                                                                                                                 |
| <b>D22</b>                                                                                                                                                                                      | 3,6%                                                                                                                                                                                                                                                                                                                                                                                                                                                                                                                                                                                           | 39,6%                  | <b>56,8%</b> |        |          |            |      |       |              |                                                                                                                                                                                                                                                                                                                                                                                                                                                                                                                                                                                                 |

| Domanda                                                                                                                                                                                                                                                                                                                                              | Caratteristiche                                                                                                                                                                                                                                                                                                                                                                                                                                                                                                                                                                                                                                                                                                                                                                                                                                                                      | Descrizione e commento |          |        |          |     |      |       |       |                                                                                                                                                                                                                                                                                                                                                                                                                                                                                                                                                                                                                                                                            |
|------------------------------------------------------------------------------------------------------------------------------------------------------------------------------------------------------------------------------------------------------------------------------------------------------------------------------------------------------|--------------------------------------------------------------------------------------------------------------------------------------------------------------------------------------------------------------------------------------------------------------------------------------------------------------------------------------------------------------------------------------------------------------------------------------------------------------------------------------------------------------------------------------------------------------------------------------------------------------------------------------------------------------------------------------------------------------------------------------------------------------------------------------------------------------------------------------------------------------------------------------|------------------------|----------|--------|----------|-----|------|-------|-------|----------------------------------------------------------------------------------------------------------------------------------------------------------------------------------------------------------------------------------------------------------------------------------------------------------------------------------------------------------------------------------------------------------------------------------------------------------------------------------------------------------------------------------------------------------------------------------------------------------------------------------------------------------------------------|
| <p>D23. Nel grafico è rappresentata l'altezza di una piantina misurata in tre momenti diversi a distanza di una settimana uno dall'altro.</p> 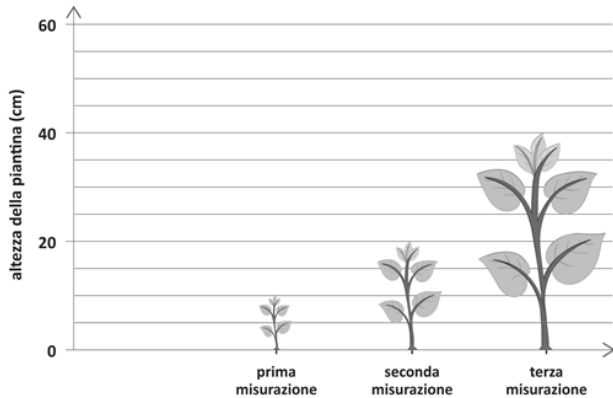 <p>Di quanto è cresciuta in altezza la piantina tra la prima e la seconda misurazione?</p> <p>Risposta: ..... cm</p> | <p><b>AMBITO PREVALENTE</b><br/>Dati e previsioni</p> <p><b>SCOPO DELLA DOMANDA</b><br/>Leggere dati su un diagramma per individuare la variazione di una crescita in un arco temporale.</p> <p><b>Indicazioni nazionali: TRAGUARDO</b><br/>Ricerca dati per ricavare informazioni e costruisce rappresentazioni (tabelle e grafici). Ricava informazioni anche da dati rappresentati in tabelle e grafici.</p> <p><b>Indicazioni nazionali: OBIETTIVO</b><br/><i>Rappresentare relazioni e dati e, in situazioni significative, utilizzare le rappresentazioni per ricavare informazioni, formulare giudizi e prendere decisioni.</i></p> <p><b>DIMENSIONE</b><br/>Risolvere problemi</p> <p><b>RISULTATI DEL CAMPIONE</b></p> <table><tr><th>Item</th><th>Mancante</th><th>Errata</th><th>Corretta</th></tr><tr><td>D23</td><td>1,5%</td><td>36,0%</td><td>62,5%</td></tr></table> | Item                   | Mancante | Errata | Corretta | D23 | 1,5% | 36,0% | 62,5% | <p><b>Risposta corretta: 10</b></p> <p>Il quesito chiede di leggere un diagramma che riporta l'altezza di una piantina misurata a intervalli di tempo regolari. Lo studente deve individuare i valori corrispondenti alle altezze rilevate alla prima e alla seconda misurazione, e calcolarne la differenza. Un elemento di possibile difficoltà è costituito dall'interpretazione e gestione della scala relativa all'asse delle ordinate su cui vengono riportati solo alcuni valori: per rispondere correttamente lo studente deve, sulla base dei dati forniti, determinare la metrica usata e operare delle sottrazioni tra i valori identificati sul diagramma.</p> |
| Item                                                                                                                                                                                                                                                                                                                                                 | Mancante                                                                                                                                                                                                                                                                                                                                                                                                                                                                                                                                                                                                                                                                                                                                                                                                                                                                             | Errata                 | Corretta |        |          |     |      |       |       |                                                                                                                                                                                                                                                                                                                                                                                                                                                                                                                                                                                                                                                                            |
| D23                                                                                                                                                                                                                                                                                                                                                  | 1,5%                                                                                                                                                                                                                                                                                                                                                                                                                                                                                                                                                                                                                                                                                                                                                                                                                                                                                 | 36,0%                  | 62,5%    |        |          |     |      |       |       |                                                                                                                                                                                                                                                                                                                                                                                                                                                                                                                                                                                                                                                                            |



| Domanda                                                                                                                                                                                                                                                                                                                   | Caratteristiche                                                                                                                                                                                                                                                                                                                                                                                                                                                                                                                                                                                                                                                                               | Descrizione e commento |          |       |       |   |   |     |      |       |       |       |       |                                                                                                                                                                                                                                                                                                                                                                                                        |
|---------------------------------------------------------------------------------------------------------------------------------------------------------------------------------------------------------------------------------------------------------------------------------------------------------------------------|-----------------------------------------------------------------------------------------------------------------------------------------------------------------------------------------------------------------------------------------------------------------------------------------------------------------------------------------------------------------------------------------------------------------------------------------------------------------------------------------------------------------------------------------------------------------------------------------------------------------------------------------------------------------------------------------------|------------------------|----------|-------|-------|---|---|-----|------|-------|-------|-------|-------|--------------------------------------------------------------------------------------------------------------------------------------------------------------------------------------------------------------------------------------------------------------------------------------------------------------------------------------------------------------------------------------------------------|
| <p><b>D24. Quale delle seguenti espressioni <u>non</u> dà lo stesso risultato di 316 x 8?</b></p> <p>A.    <input type="checkbox"/>    316 x 9 - 316</p> <p>B.    <input type="checkbox"/>    316 x 7 + 316</p> <p>C.    <input type="checkbox"/>    315 x 8 + 8</p> <p>D.    <input type="checkbox"/>    315 x 8 + 1</p> | <p><b>AMBITO PREVALENTE</b><br/>Numeri</p> <p><b>SCOPO DELLA DOMANDA</b><br/>Riconoscere l'uguaglianza di espressioni basandosi sul significato dell'operazione di moltiplicazione e sul ruolo dei suoi fattori.</p> <p><b>Indicazioni nazionali: TRAGUARDO</b><br/>L'alunno si muove con sicurezza nel calcolo scritto e mentale con i numeri naturali e sa valutare l'opportunità di ricorrere a una calcolatrice.</p> <p><b>DIMENSIONE</b><br/>Conoscere</p> <p><b>RISULTATI DEL CAMPIONE</b></p> <table><tr><th>Item</th><th>Mancante</th><th>A</th><th>B</th><th>C</th><th>D</th></tr><tr><td>D24</td><td>2,7%</td><td>12,8%</td><td>13,4%</td><td>22,3%</td><td>48,8%</td></tr></table> | Item                   | Mancante | A     | B     | C | D | D24 | 2,7% | 12,8% | 13,4% | 22,3% | 48,8% | <p><b>Risposta corretta: D</b></p> <p>Il quesito richiede di riconoscere quale tra quattro espressioni date non equivale a quella riportata nel testo del quesito.</p> <p>Per rispondere correttamente, non è necessario svolgere i calcoli mostrati nelle diverse opzioni, in quanto sarebbe sufficiente riconoscere, nelle opzioni date, l'applicazione di proprietà delle operazioni coinvolte.</p> |
| Item                                                                                                                                                                                                                                                                                                                      | Mancante                                                                                                                                                                                                                                                                                                                                                                                                                                                                                                                                                                                                                                                                                      | A                      | B        | C     | D     |   |   |     |      |       |       |       |       |                                                                                                                                                                                                                                                                                                                                                                                                        |
| D24                                                                                                                                                                                                                                                                                                                       | 2,7%                                                                                                                                                                                                                                                                                                                                                                                                                                                                                                                                                                                                                                                                                          | 12,8%                  | 13,4%    | 22,3% | 48,8% |   |   |     |      |       |       |       |       |                                                                                                                                                                                                                                                                                                                                                                                                        |

| Domanda                                                                                                                                                                                                                                                                                                                                                                                                                                                                                                                                                                                                                                                             | Caratteristiche | Descrizione e commento |          |    |                                                                                                                                                                                                                                                                                                                                                                                                                                                                                                                                                                                                                                                                                                                                                                                                                                                                                                                                                                                                                                                                                                                                                                                                                                                                                |      |        |          |               |       |       |      |          |        |          |      |      |       |       |      |      |       |       |      |      |       |       |      |      |       |       |      |      |       |       |                                                                                                                                                                                                                                                                                                                                                                                                                                                                                                                   |
|---------------------------------------------------------------------------------------------------------------------------------------------------------------------------------------------------------------------------------------------------------------------------------------------------------------------------------------------------------------------------------------------------------------------------------------------------------------------------------------------------------------------------------------------------------------------------------------------------------------------------------------------------------------------|-----------------|------------------------|----------|----|--------------------------------------------------------------------------------------------------------------------------------------------------------------------------------------------------------------------------------------------------------------------------------------------------------------------------------------------------------------------------------------------------------------------------------------------------------------------------------------------------------------------------------------------------------------------------------------------------------------------------------------------------------------------------------------------------------------------------------------------------------------------------------------------------------------------------------------------------------------------------------------------------------------------------------------------------------------------------------------------------------------------------------------------------------------------------------------------------------------------------------------------------------------------------------------------------------------------------------------------------------------------------------|------|--------|----------|---------------|-------|-------|------|----------|--------|----------|------|------|-------|-------|------|------|-------|-------|------|------|-------|-------|------|------|-------|-------|------|------|-------|-------|-------------------------------------------------------------------------------------------------------------------------------------------------------------------------------------------------------------------------------------------------------------------------------------------------------------------------------------------------------------------------------------------------------------------------------------------------------------------------------------------------------------------|
| <p>D25. Completa le seguenti frasi inserendo nelle caselle le unità di misura scritte qu sotto.</p> <table><tr><td>km</td><td>m</td><td>cm</td><td>mm</td></tr></table> <p>Puoi usare più volte la stessa unità di misura.</p> <p>a. La larghezza del banco è di circa 50 <input type="text"/></p> <p>b. L'altezza del monte Cimone è di circa 2165 <input type="text"/></p> <p>c. La lunghezza del corridoio della scuola è di circa 20 <input type="text"/></p> <p>d. Il tratto di strada che in un'ora possiamo percorrere camminando è di circa 3 <input type="text"/></p> <p>e. Lo spessore di un foglio di cartoncino è di circa 0,5 <input type="text"/></p> | km              | m                      | cm       | mm | <p><b>AMBITO PREVALENTE</b></p> <p>Numeri</p> <p><b>SCOPO DELLA DOMANDA</b></p> <p>Scegliere le unità di misura coerenti con i valori numerici che esprimono la misurazione di grandezze in contesti reali.</p> <p><b>Indicazioni nazionali: TRAGUARDO</b></p> <p>Descrive, denomina e classifica figure in base a caratteristiche geometriche, ne determina misure, progetta e costruisce modelli concreti di vario tipo.</p> <p><b>Indicazioni nazionali: OBIETTIVO</b></p> <p>Utilizzare le principali unità di misura per lunghezze, angoli, aree, volumi/capacità, intervalli temporali, masse, pesi per effettuare misure e stime.</p> <p><b>DIMENSIONE</b></p> <p>Conoscere</p> <p><b>RISULTATI DEL CAMPIONE</b></p> <table><tr><th>Item</th><th>Errata</th><th>Corretta</th></tr><tr><td>D25 aggregata</td><td>48,4%</td><td>51,6%</td></tr></table> <table><tr><th>Item</th><th>Mancante</th><th>Errata</th><th>Corretta</th></tr><tr><td>D25a</td><td>1,6%</td><td>11,5%</td><td>86,9%</td></tr><tr><td>D25b</td><td>1,7%</td><td>27,4%</td><td>70,9%</td></tr><tr><td>D25c</td><td>1,9%</td><td>15,2%</td><td>82,9%</td></tr><tr><td>D25d</td><td>1,7%</td><td>10,1%</td><td>88,2%</td></tr><tr><td>D25e</td><td>1,7%</td><td>19,8%</td><td>78,5%</td></tr></table> | Item | Errata | Corretta | D25 aggregata | 48,4% | 51,6% | Item | Mancante | Errata | Corretta | D25a | 1,6% | 11,5% | 86,9% | D25b | 1,7% | 27,4% | 70,9% | D25c | 1,9% | 15,2% | 82,9% | D25d | 1,7% | 10,1% | 88,2% | D25e | 1,7% | 19,8% | 78,5% | <p><b>Risposta corretta: (corrette 5 su 5)</b></p> <p>a. cm b. m c. m d. km e. mm</p> <p>Questo quesito richiede di identificare quali, tra le unità di misura proposte, sono corrette per completare delle frasi su oggetti reali di cui si danno dei valori numerici che ne rappresentano la misura. Dal momento che nella domanda vengono riportati contesti che dovrebbero essere familiari per ogni alunno, si tratta principalmente di stimare la misura della lunghezza di ciascun elemento riportato.</p> |
| km                                                                                                                                                                                                                                                                                                                                                                                                                                                                                                                                                                                                                                                                  | m               | cm                     | mm       |    |                                                                                                                                                                                                                                                                                                                                                                                                                                                                                                                                                                                                                                                                                                                                                                                                                                                                                                                                                                                                                                                                                                                                                                                                                                                                                |      |        |          |               |       |       |      |          |        |          |      |      |       |       |      |      |       |       |      |      |       |       |      |      |       |       |      |      |       |       |                                                                                                                                                                                                                                                                                                                                                                                                                                                                                                                   |
| Item                                                                                                                                                                                                                                                                                                                                                                                                                                                                                                                                                                                                                                                                | Errata          | Corretta               |          |    |                                                                                                                                                                                                                                                                                                                                                                                                                                                                                                                                                                                                                                                                                                                                                                                                                                                                                                                                                                                                                                                                                                                                                                                                                                                                                |      |        |          |               |       |       |      |          |        |          |      |      |       |       |      |      |       |       |      |      |       |       |      |      |       |       |      |      |       |       |                                                                                                                                                                                                                                                                                                                                                                                                                                                                                                                   |
| D25 aggregata                                                                                                                                                                                                                                                                                                                                                                                                                                                                                                                                                                                                                                                       | 48,4%           | 51,6%                  |          |    |                                                                                                                                                                                                                                                                                                                                                                                                                                                                                                                                                                                                                                                                                                                                                                                                                                                                                                                                                                                                                                                                                                                                                                                                                                                                                |      |        |          |               |       |       |      |          |        |          |      |      |       |       |      |      |       |       |      |      |       |       |      |      |       |       |      |      |       |       |                                                                                                                                                                                                                                                                                                                                                                                                                                                                                                                   |
| Item                                                                                                                                                                                                                                                                                                                                                                                                                                                                                                                                                                                                                                                                | Mancante        | Errata                 | Corretta |    |                                                                                                                                                                                                                                                                                                                                                                                                                                                                                                                                                                                                                                                                                                                                                                                                                                                                                                                                                                                                                                                                                                                                                                                                                                                                                |      |        |          |               |       |       |      |          |        |          |      |      |       |       |      |      |       |       |      |      |       |       |      |      |       |       |      |      |       |       |                                                                                                                                                                                                                                                                                                                                                                                                                                                                                                                   |
| D25a                                                                                                                                                                                                                                                                                                                                                                                                                                                                                                                                                                                                                                                                | 1,6%            | 11,5%                  | 86,9%    |    |                                                                                                                                                                                                                                                                                                                                                                                                                                                                                                                                                                                                                                                                                                                                                                                                                                                                                                                                                                                                                                                                                                                                                                                                                                                                                |      |        |          |               |       |       |      |          |        |          |      |      |       |       |      |      |       |       |      |      |       |       |      |      |       |       |      |      |       |       |                                                                                                                                                                                                                                                                                                                                                                                                                                                                                                                   |
| D25b                                                                                                                                                                                                                                                                                                                                                                                                                                                                                                                                                                                                                                                                | 1,7%            | 27,4%                  | 70,9%    |    |                                                                                                                                                                                                                                                                                                                                                                                                                                                                                                                                                                                                                                                                                                                                                                                                                                                                                                                                                                                                                                                                                                                                                                                                                                                                                |      |        |          |               |       |       |      |          |        |          |      |      |       |       |      |      |       |       |      |      |       |       |      |      |       |       |      |      |       |       |                                                                                                                                                                                                                                                                                                                                                                                                                                                                                                                   |
| D25c                                                                                                                                                                                                                                                                                                                                                                                                                                                                                                                                                                                                                                                                | 1,9%            | 15,2%                  | 82,9%    |    |                                                                                                                                                                                                                                                                                                                                                                                                                                                                                                                                                                                                                                                                                                                                                                                                                                                                                                                                                                                                                                                                                                                                                                                                                                                                                |      |        |          |               |       |       |      |          |        |          |      |      |       |       |      |      |       |       |      |      |       |       |      |      |       |       |      |      |       |       |                                                                                                                                                                                                                                                                                                                                                                                                                                                                                                                   |
| D25d                                                                                                                                                                                                                                                                                                                                                                                                                                                                                                                                                                                                                                                                | 1,7%            | 10,1%                  | 88,2%    |    |                                                                                                                                                                                                                                                                                                                                                                                                                                                                                                                                                                                                                                                                                                                                                                                                                                                                                                                                                                                                                                                                                                                                                                                                                                                                                |      |        |          |               |       |       |      |          |        |          |      |      |       |       |      |      |       |       |      |      |       |       |      |      |       |       |      |      |       |       |                                                                                                                                                                                                                                                                                                                                                                                                                                                                                                                   |
| D25e                                                                                                                                                                                                                                                                                                                                                                                                                                                                                                                                                                                                                                                                | 1,7%            | 19,8%                  | 78,5%    |    |                                                                                                                                                                                                                                                                                                                                                                                                                                                                                                                                                                                                                                                                                                                                                                                                                                                                                                                                                                                                                                                                                                                                                                                                                                                                                |      |        |          |               |       |       |      |          |        |          |      |      |       |       |      |      |       |       |      |      |       |       |      |      |       |       |      |      |       |       |                                                                                                                                                                                                                                                                                                                                                                                                                                                                                                                   |



| Domanda                                                                                                                                                                                        | Caratteristiche                                                                                                                                                                                                                                                                                                                                                                                                                                                                                                                                                                                                                                                                                                      | Descrizione e commento |          |        |          |     |      |       |       |                                                                                                                                                                                                                                                                                                                                                                                                                                                                                                                                                                                                                                                                                                                                               |
|------------------------------------------------------------------------------------------------------------------------------------------------------------------------------------------------|----------------------------------------------------------------------------------------------------------------------------------------------------------------------------------------------------------------------------------------------------------------------------------------------------------------------------------------------------------------------------------------------------------------------------------------------------------------------------------------------------------------------------------------------------------------------------------------------------------------------------------------------------------------------------------------------------------------------|------------------------|----------|--------|----------|-----|------|-------|-------|-----------------------------------------------------------------------------------------------------------------------------------------------------------------------------------------------------------------------------------------------------------------------------------------------------------------------------------------------------------------------------------------------------------------------------------------------------------------------------------------------------------------------------------------------------------------------------------------------------------------------------------------------------------------------------------------------------------------------------------------------|
| <p>D26. Osserva la figura.</p> 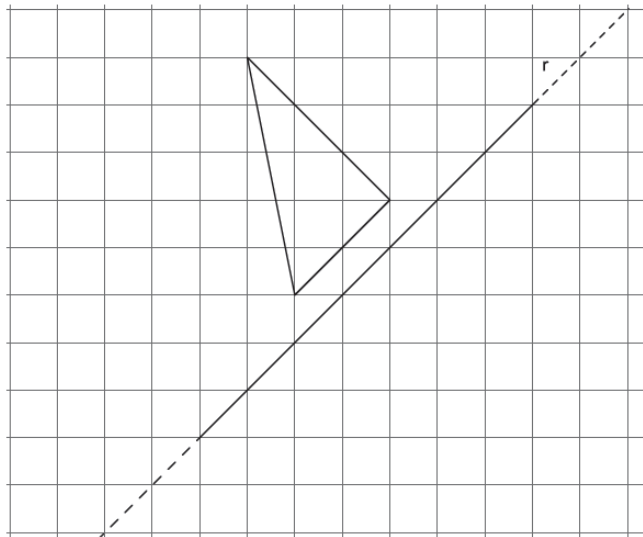 <p>Disegna il triangolo simmetrico di quello dato rispetto alla retta r.</p> | <p><b>AMBITO PREVALENTE</b><br/>Spazio figure</p> <p><b>SCOPO DELLA DOMANDA</b><br/>Disegnare la figura simmetrica a una data rispetto a un asse di simmetria definito.</p> <p><b>Indicazioni nazionali: TRAGUARDO</b><br/>Riconosce e rappresenta forme del piano e dello spazio, relazioni e strutture che si trovano in natura o che sono state create dall'uomo.</p> <p><b>Indicazioni nazionali: OBIETTIVO</b><br/><i>Riconoscere figure ruotate, traslate e riflesse.</i></p> <p><b>DIMENSIONE</b><br/>Conoscere</p> <p><b>RISULTATI DEL CAMPIONE</b></p> <table><tr><th>Item</th><th>Mancante</th><th>Errata</th><th>Corretta</th></tr><tr><td>D26</td><td>6,3%</td><td>26,8%</td><td>66,9%</td></tr></table> | Item                   | Mancante | Errata | Corretta | D26 | 6,3% | 26,8% | 66,9% | <p><b>Risposta corretta:</b></p> 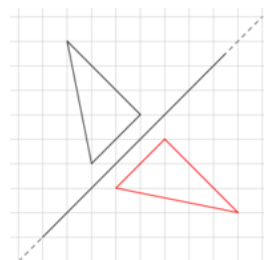 <p>Il quesito richiede di disegnare, su una griglia quadrettata, un triangolo rettangolo simmetrico a uno dato rispetto a un asse di simmetria disegnato con una pendenza di 45° rispetto il quadrettato. Grazie al quadrettato il controllo della perpendicolarità dovrebbe essere agevolato. Possibili errori potrebbero essere:</p> <ul style="list-style-type: none"><li>- disegnare triangoli traslati rispetto a quello dato</li><li>- disegnare triangoli isosceli che hanno simmetria interna, ma non coerente con la richiesta</li><li>- disegnare triangoli rettangoli non congruenti a quello dato.</li></ul> |
| Item                                                                                                                                                                                           | Mancante                                                                                                                                                                                                                                                                                                                                                                                                                                                                                                                                                                                                                                                                                                             | Errata                 | Corretta |        |          |     |      |       |       |                                                                                                                                                                                                                                                                                                                                                                                                                                                                                                                                                                                                                                                                                                                                               |
| D26                                                                                                                                                                                            | 6,3%                                                                                                                                                                                                                                                                                                                                                                                                                                                                                                                                                                                                                                                                                                                 | 26,8%                  | 66,9%    |        |          |     |      |       |       |                                                                                                                                                                                                                                                                                                                                                                                                                                                                                                                                                                                                                                                                                                                                               |

| Domanda                                                                                                                                                                                                                                                                                                                                                                                                                                                                                                                                                      | Caratteristiche                                                                                                                                                                                                                                                                                                                                                                                                                                                                                                                                                                                                                                                                                                                                             | Descrizione e commento |          |       |       |   |   |     |      |      |       |       |       |                                                                                                                                                                                                                                                                                                                                                                                                                                                                                                                                                                                                                                                                                                                                                                                                                                                                                                                                                                                                                                                                                                                                                                                                                                                                                               |
|--------------------------------------------------------------------------------------------------------------------------------------------------------------------------------------------------------------------------------------------------------------------------------------------------------------------------------------------------------------------------------------------------------------------------------------------------------------------------------------------------------------------------------------------------------------|-------------------------------------------------------------------------------------------------------------------------------------------------------------------------------------------------------------------------------------------------------------------------------------------------------------------------------------------------------------------------------------------------------------------------------------------------------------------------------------------------------------------------------------------------------------------------------------------------------------------------------------------------------------------------------------------------------------------------------------------------------------|------------------------|----------|-------|-------|---|---|-----|------|------|-------|-------|-------|-----------------------------------------------------------------------------------------------------------------------------------------------------------------------------------------------------------------------------------------------------------------------------------------------------------------------------------------------------------------------------------------------------------------------------------------------------------------------------------------------------------------------------------------------------------------------------------------------------------------------------------------------------------------------------------------------------------------------------------------------------------------------------------------------------------------------------------------------------------------------------------------------------------------------------------------------------------------------------------------------------------------------------------------------------------------------------------------------------------------------------------------------------------------------------------------------------------------------------------------------------------------------------------------------|
| <p>D27. Il falegname Gino costruisce tavoli di diverse misure usando pannelli di legno quadrati delle stesse dimensioni e li rifinisce con cornici tutte dello stesso spessore.</p> <p>Questi sono i diversi modelli costruiti da Gino.</p> <div>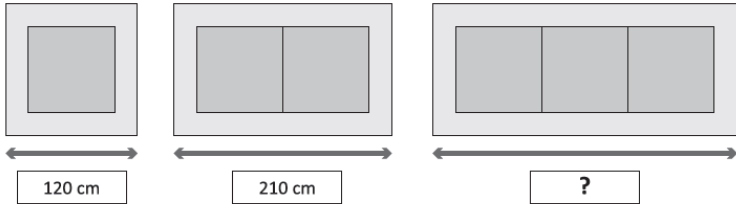</div> <p>Quanto è lungo il tavolo più grande?</p> <p>A. <input type="checkbox"/> 270 cm</p> <p>B. <input type="checkbox"/> 300 cm</p> <p>C. <input type="checkbox"/> 330 cm</p> <p>D. <input type="checkbox"/> 360 cm</p> | <p><b>AMBITO PREVALENTE</b><br/>Relazioni e funzioni</p> <p><b>SCOPO DELLA DOMANDA</b><br/>Risolvere un problema in cui occorre individuare una regola che genera una sequenza.</p> <p><b>Indicazioni nazionali: TRAGUARDO</b><br/>Riesce a risolvere facili problemi in tutti gli ambiti di contenuto, mantenendo il controllo sia sul processo risolutivo, sia sui risultati. Descrive il procedimento seguito e riconosce strategie di soluzione diverse dalla propria.</p> <p><b>DIMENSIONE</b><br/>Risolvere problemi</p> <p><b>RISULTATI DEL CAMPIONE</b></p> <table><tr><th>Item</th><th>Mancante</th><th>A</th><th>B</th><th>C</th><th>D</th></tr><tr><td>D27</td><td>0,9%</td><td>6,8%</td><td>47,3%</td><td>34,3%</td><td>10,7%</td></tr></table> | Item                   | Mancante | A     | B     | C | D | D27 | 0,9% | 6,8% | 47,3% | 34,3% | 10,7% | <p><b>Risposta corretta: B</b></p> <p>Il quesito richiede di individuare, attraverso le rappresentazioni fornite, le ricorsività e le variazioni di una sequenza data.</p> <p>Un alunno può utilizzare diverse strategie per rispondere correttamente al quesito. Una consiste nel riconoscere che la differenza di lunghezza tra il primo e il secondo modello è di 90 cm, quindi per trovare la misura del terzo modello basta aggiungere 90 cm alla misura del secondo modello. Un'altra consiste nell'individuare il lato del pannello quadrato attraverso il calcolo della differenza tra 240 (doppio della lunghezza del primo elemento) e 210 (lunghezza del secondo elemento). Infatti 30 rappresenta il doppio dello spessore della cornice e, quindi, la cornice è spessa 15 cm e il pannello quadrato ha lato 90 cm (120 – 15 – 15).</p> <p>Lo studente potrebbe anche procedere facendo una stima basandosi sulle opzioni di risposta già fornite. L'opzione A si scarta perché sottostima rispetto alla variazione di 90 cm tra il primo e il secondo elemento. L'opzione C rappresenta la somma tra il primo e il secondo elemento e risulta sovrabbondante (troppa cornice). L'opzione D rappresenta il triplo del primo elemento ed è, anche visivamente, sovrabbondante.</p> |
| Item                                                                                                                                                                                                                                                                                                                                                                                                                                                                                                                                                         | Mancante                                                                                                                                                                                                                                                                                                                                                                                                                                                                                                                                                                                                                                                                                                                                                    | A                      | B        | C     | D     |   |   |     |      |      |       |       |       |                                                                                                                                                                                                                                                                                                                                                                                                                                                                                                                                                                                                                                                                                                                                                                                                                                                                                                                                                                                                                                                                                                                                                                                                                                                                                               |
| D27                                                                                                                                                                                                                                                                                                                                                                                                                                                                                                                                                          | 0,9%                                                                                                                                                                                                                                                                                                                                                                                                                                                                                                                                                                                                                                                                                                                                                        | 6,8%                   | 47,3%    | 34,3% | 10,7% |   |   |     |      |      |       |       |       |                                                                                                                                                                                                                                                                                                                                                                                                                                                                                                                                                                                                                                                                                                                                                                                                                                                                                                                                                                                                                                                                                                                                                                                                                                                                                               |



| Domanda                                                                                                                                                                                                                                                                                                                                                                                                                   | Caratteristiche                                                                                                                                                                                                                                                                                                                                                                                                                                                                                                                                                                                                                                                                                                                                                                                         | Descrizione e commento |          |        |          |     |      |       |       |                                                                                                                                                                                                                                                                                                                                                                                                                                                                                                                                                                                                                                                                                                                                                                                              |
|---------------------------------------------------------------------------------------------------------------------------------------------------------------------------------------------------------------------------------------------------------------------------------------------------------------------------------------------------------------------------------------------------------------------------|---------------------------------------------------------------------------------------------------------------------------------------------------------------------------------------------------------------------------------------------------------------------------------------------------------------------------------------------------------------------------------------------------------------------------------------------------------------------------------------------------------------------------------------------------------------------------------------------------------------------------------------------------------------------------------------------------------------------------------------------------------------------------------------------------------|------------------------|----------|--------|----------|-----|------|-------|-------|----------------------------------------------------------------------------------------------------------------------------------------------------------------------------------------------------------------------------------------------------------------------------------------------------------------------------------------------------------------------------------------------------------------------------------------------------------------------------------------------------------------------------------------------------------------------------------------------------------------------------------------------------------------------------------------------------------------------------------------------------------------------------------------------|
| <p>D28. Luca lancia due dadi a sei facce non truccati.</p> <div>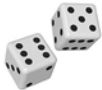</div> <p>Completa la frase inserendo una delle seguenti espressioni:</p> <div><div>MAGGIORE DELLA</div><div>MINORE DELLA</div><div>UGUALE ALLA</div></div> <p>La probabilità che la somma dei punti sui due dadi sia 12 è .....<br/>probabilità che la somma sia 2.</p> | <p><b>AMBITO PREVALENTE</b><br/>Dati e previsioni</p> <p><b>SCOPO DELLA DOMANDA</b><br/>Riconoscere l'equiprobabilità di due eventi.</p> <p><b>Indicazioni nazionali: TRAGUARDO</b><br/>Riconosce e quantifica, in casi semplici, situazioni di incertezza.</p> <p><b>Indicazioni nazionali: OBIETTIVO</b><br/><i>In situazioni concrete, di una coppia di eventi intuire e cominciare ad argomentare qual è il più probabile, dando una prima quantificazione nei casi più semplici, oppure riconoscere se si tratta di eventi ugualmente probabili.</i></p> <p><b>DIMENSIONE</b><br/>Risolvere problemi</p> <p><b>RISULTATI DEL CAMPIONE</b></p> <table><tr><th>Item</th><th>Mancante</th><th>Errata</th><th>Corretta</th></tr><tr><td>D28</td><td>2,6%</td><td>45,5%</td><td>51,9%</td></tr></table> | Item                   | Mancante | Errata | Corretta | D28 | 2,6% | 45,5% | 51,9% | <p><b>Risposta corretta: uguale alla</b></p> <p>Il quesito richiede di riconoscere l'equiprobabilità di una coppia di eventi relativi al lancio di due dadi a sei facce non truccati: ossia che il primo evento (la somma dei punti ottenuti col lancio di due dadi è pari a 12) ha esattamente la stessa probabilità di verificarsi del secondo evento (la somma dei punti ottenuti col lancio di due dadi è pari a 2). Infatti, la somma 2 si può ottenere solo nel caso in cui su entrambi i dadi esca 1, così come la somma 12 si può ottenere solo nel caso in cui su entrambi i dadi esca 6.</p> <p>Un errore possibile potrebbe essere quello di rispondere che la probabilità di ottenere 12 è maggiore della probabilità di ottenere 2 semplicemente perché 12 è maggiore di 2.</p> |
| Item                                                                                                                                                                                                                                                                                                                                                                                                                      | Mancante                                                                                                                                                                                                                                                                                                                                                                                                                                                                                                                                                                                                                                                                                                                                                                                                | Errata                 | Corretta |        |          |     |      |       |       |                                                                                                                                                                                                                                                                                                                                                                                                                                                                                                                                                                                                                                                                                                                                                                                              |
| D28                                                                                                                                                                                                                                                                                                                                                                                                                       | 2,6%                                                                                                                                                                                                                                                                                                                                                                                                                                                                                                                                                                                                                                                                                                                                                                                                    | 45,5%                  | 51,9%    |        |          |     |      |       |       |                                                                                                                                                                                                                                                                                                                                                                                                                                                                                                                                                                                                                                                                                                                                                                                              |

| Domanda                                                                                                                                                                                                                                                                                                                                                                                                                                                                                                                                                                                                                                                                                                                                                                                                                                                                                                                                                                                                                                        | Caratteristiche                                                                                                                                                                                                                                                                                                                                                                                                                                                                                                                                                                                                                                                     | Descrizione e commento |          |       |      |   |   |     |      |       |       |       |      |                                                                                                                                                                                                                                                                                                                                                                                                                                                                                                                                                                                                                                                                                                                                                              |
|------------------------------------------------------------------------------------------------------------------------------------------------------------------------------------------------------------------------------------------------------------------------------------------------------------------------------------------------------------------------------------------------------------------------------------------------------------------------------------------------------------------------------------------------------------------------------------------------------------------------------------------------------------------------------------------------------------------------------------------------------------------------------------------------------------------------------------------------------------------------------------------------------------------------------------------------------------------------------------------------------------------------------------------------|---------------------------------------------------------------------------------------------------------------------------------------------------------------------------------------------------------------------------------------------------------------------------------------------------------------------------------------------------------------------------------------------------------------------------------------------------------------------------------------------------------------------------------------------------------------------------------------------------------------------------------------------------------------------|------------------------|----------|-------|------|---|---|-----|------|-------|-------|-------|------|--------------------------------------------------------------------------------------------------------------------------------------------------------------------------------------------------------------------------------------------------------------------------------------------------------------------------------------------------------------------------------------------------------------------------------------------------------------------------------------------------------------------------------------------------------------------------------------------------------------------------------------------------------------------------------------------------------------------------------------------------------------|
| <p>D29. Questo contenitore ha la forma di un tronco di cono ed è appoggiato al piano sulla base minore.</p> <p>Come vedi in figura, il liquido al suo interno arriva a un'altezza di 5 cm.</p> <div>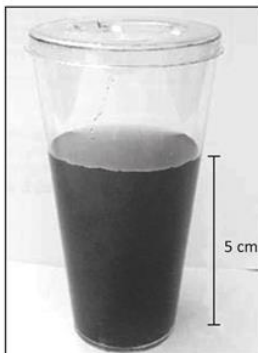</div> <p>Se chiudo il contenitore e poi lo capovolgo appoggiandolo al piano sulla base maggiore, il liquido al suo interno</p> <p>A. <input type="checkbox"/> arriverà a 5 cm di altezza perché la quantità di liquido all'interno del contenitore è sempre la stessa</p> <p>B. <input type="checkbox"/> arriverà a più di 5 cm di altezza perché la base di appoggio ora è più grande e la quantità di liquido è sempre la stessa</p> <p>C. <input type="checkbox"/> arriverà a meno di 5 cm di altezza perché la base di appoggio ora è più grande e la quantità di liquido è sempre la stessa</p> <p>D. <input type="checkbox"/> arriverà a meno di 5 cm di altezza perché la quantità di liquido nel contenitore è minore dopo il capovolgimento</p> | <p><b>AMBITO PREVALENTE</b><br/>Spazio figure</p> <p><b>SCOPO DELLA DOMANDA</b><br/>Comprendere la relazione tra il volume occupato da un liquido e la forma del contenitore.</p> <p><b>Indicazioni nazionali: TRAGUARDO</b><br/>Descrive, denomina e classifica figure in base a caratteristiche geometriche, ne determina misure, progetta e costruisce modelli concreti di vario tipo.</p> <p><b>DIMENSIONE</b><br/>Argomentare</p> <p><b>RISULTATI DEL CAMPIONE</b></p> <table><tr><th>Item</th><th>Mancante</th><th>A</th><th>B</th><th>C</th><th>D</th></tr><tr><td>D29</td><td>1,2%</td><td>24,5%</td><td>10,9%</td><td>53,7%</td><td>9,7%</td></tr></table> | Item                   | Mancante | A     | B    | C | D | D29 | 1,2% | 24,5% | 10,9% | 53,7% | 9,7% | <p><b>Risposta corretta: C</b></p> <p>Il quesito richiede di interpretare una situazione reale in cui esiste una relazione tra la forma di un contenitore e la distribuzione del liquido contenuto in esso.</p> <p>L'opzione A può identificare gli alunni che applicano al tronco di cono le stesse proprietà di un cilindro oppure pensano che la forma del contenitore non influenzi l'altezza a cui il liquido arriva, nel caso di capovolgimento del contenitore, dal momento che la quantità è sempre la stessa.</p> <p>L'opzione B può rilevare gli alunni che fanno corrispondere alla frase “base maggiore” la proprietà di ottenere un'altezza maggiore.</p> <p>L'opzione D rileva un non controllo dell'invarianza della quantità di liquido.</p> |
| Item                                                                                                                                                                                                                                                                                                                                                                                                                                                                                                                                                                                                                                                                                                                                                                                                                                                                                                                                                                                                                                           | Mancante                                                                                                                                                                                                                                                                                                                                                                                                                                                                                                                                                                                                                                                            | A                      | B        | C     | D    |   |   |     |      |       |       |       |      |                                                                                                                                                                                                                                                                                                                                                                                                                                                                                                                                                                                                                                                                                                                                                              |
| D29                                                                                                                                                                                                                                                                                                                                                                                                                                                                                                                                                                                                                                                                                                                                                                                                                                                                                                                                                                                                                                            | 1,2%                                                                                                                                                                                                                                                                                                                                                                                                                                                                                                                                                                                                                                                                | 24,5%                  | 10,9%    | 53,7% | 9,7% |   |   |     |      |       |       |       |      |                                                                                                                                                                                                                                                                                                                                                                                                                                                                                                                                                                                                                                                                                                                                                              |



| Domanda                                                                                                                                                                                                                                                                                                                                                                                                                                  | Caratteristiche                                                                                                                                                                                                                                                                                                                                                                                                                                                                                                                                                                                                                                                                                                                                                                                                                                                                                                                  | Descrizione e commento |          |        |          |     |      |       |       |                                                                                                                                                                                                                                                                                                                                                                                                                                                                                                                                                                                                                                                                                                                                                                        |
|------------------------------------------------------------------------------------------------------------------------------------------------------------------------------------------------------------------------------------------------------------------------------------------------------------------------------------------------------------------------------------------------------------------------------------------|----------------------------------------------------------------------------------------------------------------------------------------------------------------------------------------------------------------------------------------------------------------------------------------------------------------------------------------------------------------------------------------------------------------------------------------------------------------------------------------------------------------------------------------------------------------------------------------------------------------------------------------------------------------------------------------------------------------------------------------------------------------------------------------------------------------------------------------------------------------------------------------------------------------------------------|------------------------|----------|--------|----------|-----|------|-------|-------|------------------------------------------------------------------------------------------------------------------------------------------------------------------------------------------------------------------------------------------------------------------------------------------------------------------------------------------------------------------------------------------------------------------------------------------------------------------------------------------------------------------------------------------------------------------------------------------------------------------------------------------------------------------------------------------------------------------------------------------------------------------------|
| <p>D30. Osserva la figura formata da rettangoli di diverse dimensioni.</p> 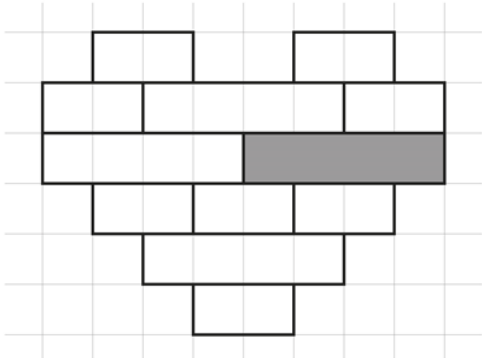 <p>Completa la frase scrivendo al posto dei puntini una delle due parole che vedi sotto la riga dei puntini.</p> <p>Se tolgo il rettangolo grigio dalla figura, l'area della figura .....<br/>(aumenta/diminuisce)</p> <p>e il perimetro .....<br/>(aumenta/diminuisce)</p> | <p><b>AMBITO PREVALENTE</b><br/>Spazio figure</p> <p><b>SCOPO DELLA DOMANDA</b><br/>Individuare la variazione di area e perimetro di una figura in seguito a una modifica effettuata.</p> <p><b>Indicazioni nazionali: TRAGUARDO</b><br/>Descrive, denomina e classifica figure in base a caratteristiche geometriche, ne determina misure, progetta e costruisce modelli concreti di vario tipo.</p> <p><b>Indicazioni nazionali: OBIETTIVO</b><br/><i>Determinare il perimetro di una figura utilizzando le più comuni formule o altri procedimenti.</i><br/><i>Determinare l'area di rettangoli e triangoli e di altre figure per scomposizione o utilizzando le più comuni formule.</i></p> <p><b>DIMENSIONE</b><br/>Conoscere</p> <p><b>RISULTATI DEL CAMPIONE</b></p> <table><tr><th>Item</th><th>Mancante</th><th>Errata</th><th>Corretta</th></tr><tr><td>D30</td><td>2,1%</td><td>36,2%</td><td>61,7%</td></tr></table> | Item                   | Mancante | Errata | Corretta | D30 | 2,1% | 36,2% | 61,7% | <p><b>Risposta corretta:</b> Se tolgo il rettangolo grigio dalla figura, l'area della figura <u>diminuisce</u> e il perimetro <u>aumenta</u></p> <p>Il quesito richiede di immaginare di modificare una figura data e analizzarne le variazioni di area e perimetro rispetto alla figura di partenza. In questo tipo di problemi geometrici togliere parti di figure non implica sempre il diminuire di alcune misure; infatti, se per l'area è evidente che accada, per il perimetro vanno analizzate le singole situazioni.</p> <p>Poiché la risposta era considerata corretta solo se entrambi gli inserimenti erano corretti, un possibile errore può essere stato quello di associare alla evidente diminuzione dell'area anche la diminuzione del perimetro.</p> |
| Item                                                                                                                                                                                                                                                                                                                                                                                                                                     | Mancante                                                                                                                                                                                                                                                                                                                                                                                                                                                                                                                                                                                                                                                                                                                                                                                                                                                                                                                         | Errata                 | Corretta |        |          |     |      |       |       |                                                                                                                                                                                                                                                                                                                                                                                                                                                                                                                                                                                                                                                                                                                                                                        |
| D30                                                                                                                                                                                                                                                                                                                                                                                                                                      | 2,1%                                                                                                                                                                                                                                                                                                                                                                                                                                                                                                                                                                                                                                                                                                                                                                                                                                                                                                                             | 36,2%                  | 61,7%    |        |          |     |      |       |       |                                                                                                                                                                                                                                                                                                                                                                                                                                                                                                                                                                                                                                                                                                                                                                        |

| Domanda                                                                                                                                                                                                                                                                                                | Caratteristiche                                                                                                                                                                                                                                                                                                                                                                                                                                                                                                                                                                                                                                                                                                                                                                                                                        | Descrizione e commento |          |        |          |     |      |       |       |                                                                                                                                                                                                                                                                                                                                                                                                                                                                                    |
|--------------------------------------------------------------------------------------------------------------------------------------------------------------------------------------------------------------------------------------------------------------------------------------------------------|----------------------------------------------------------------------------------------------------------------------------------------------------------------------------------------------------------------------------------------------------------------------------------------------------------------------------------------------------------------------------------------------------------------------------------------------------------------------------------------------------------------------------------------------------------------------------------------------------------------------------------------------------------------------------------------------------------------------------------------------------------------------------------------------------------------------------------------|------------------------|----------|--------|----------|-----|------|-------|-------|------------------------------------------------------------------------------------------------------------------------------------------------------------------------------------------------------------------------------------------------------------------------------------------------------------------------------------------------------------------------------------------------------------------------------------------------------------------------------------|
| <p><b>D31.</b> Domenico, Lucia e Davide hanno giocato a turno a un gioco elettronico complessivamente per un’ora e un quarto di tempo.</p> <p>Hanno giocato tutti e tre per la stessa quantità di tempo.</p> <p>Per quanti minuti ha giocato ciascun bambino?</p> <p><b>Risposta:</b> ..... minuti</p> | <p><b>AMBITO PREVALENTE</b><br/>Numeri</p> <p><b>SCOPO DELLA DOMANDA</b><br/>Effettuare una divisione con grandezze espresse con unità di misura del sistema sessagesimale.</p> <p><b>Indicazioni nazionali: TRAGUARDO</b><br/>L'alunno si muove con sicurezza nel calcolo scritto e mentale con i numeri naturali e sa valutare l'opportunità di ricorrere a una calcolatrice.</p> <p><b>Indicazioni nazionali: OBIETTIVO</b><br/><i>Utilizzare le principali unità di misura per lunghezze, angoli, aree, volumi/capacità, intervalli temporali, masse, pesi per effettuare misure e stime.</i></p> <p><b>DIMENSIONE</b><br/>Conoscere</p> <p><b>RISULTATI DEL CAMPIONE</b></p> <table><tr><th>Item</th><th>Mancante</th><th>Errata</th><th>Corretta</th></tr><tr><td>D31</td><td>5,9%</td><td>51,2%</td><td>42,9%</td></tr></table> | Item                   | Mancante | Errata | Corretta | D31 | 5,9% | 51,2% | 42,9% | <p><b>Risposta corretta: 25</b></p> <p>Per risolvere il quesito è necessario conoscere e saper gestire le misure di tempo: in particolare l'alunno deve sapere che un’ora corrisponde a 60 minuti e un quarto d’ora corrisponde a 15 minuti. Un possibile errore potrebbe derivare da una lettura superficiale del testo che potrebbe portare alla non considerazione dell’avverbio “complessivamente” e quindi a ritenere erroneamente che ogni bambino giochi per 75 minuti.</p> |
| Item                                                                                                                                                                                                                                                                                                   | Mancante                                                                                                                                                                                                                                                                                                                                                                                                                                                                                                                                                                                                                                                                                                                                                                                                                               | Errata                 | Corretta |        |          |     |      |       |       |                                                                                                                                                                                                                                                                                                                                                                                                                                                                                    |
| D31                                                                                                                                                                                                                                                                                                    | 5,9%                                                                                                                                                                                                                                                                                                                                                                                                                                                                                                                                                                                                                                                                                                                                                                                                                                   | 51,2%                  | 42,9%    |        |          |     |      |       |       |                                                                                                                                                                                                                                                                                                                                                                                                                                                                                    |



| Domanda                                                                                                                                                                                                                                                                                                                                                                                                                                                                                                                                                                                                                                                                                                                                                                                                                                                                                                                                                                                                                                                                       | Caratteristiche                                                                                                       | Descrizione e commento   |                          |    |                                              |                          |                          |    |                                                                                  |                          |                          |    |                                                                                                                       |                          |                          |                                                                                                                                                                                                                                                                                                                                                                                                                                                                                                                                                                                                                                                                                                                                                                                                                                                                                                                                                                                                                                                                                                                                                                                                         |      |        |          |                      |       |              |      |          |      |       |             |      |       |              |             |      |              |       |             |      |       |              |                                                                                                                                                                                                                                                                                                                                                                                                                                                                                                                                                                                                                                                                                                                                                                                                                                                                                                  |
|-------------------------------------------------------------------------------------------------------------------------------------------------------------------------------------------------------------------------------------------------------------------------------------------------------------------------------------------------------------------------------------------------------------------------------------------------------------------------------------------------------------------------------------------------------------------------------------------------------------------------------------------------------------------------------------------------------------------------------------------------------------------------------------------------------------------------------------------------------------------------------------------------------------------------------------------------------------------------------------------------------------------------------------------------------------------------------|-----------------------------------------------------------------------------------------------------------------------|--------------------------|--------------------------|----|----------------------------------------------|--------------------------|--------------------------|----|----------------------------------------------------------------------------------|--------------------------|--------------------------|----|-----------------------------------------------------------------------------------------------------------------------|--------------------------|--------------------------|---------------------------------------------------------------------------------------------------------------------------------------------------------------------------------------------------------------------------------------------------------------------------------------------------------------------------------------------------------------------------------------------------------------------------------------------------------------------------------------------------------------------------------------------------------------------------------------------------------------------------------------------------------------------------------------------------------------------------------------------------------------------------------------------------------------------------------------------------------------------------------------------------------------------------------------------------------------------------------------------------------------------------------------------------------------------------------------------------------------------------------------------------------------------------------------------------------|------|--------|----------|----------------------|-------|--------------|------|----------|------|-------|-------------|------|-------|--------------|-------------|------|--------------|-------|-------------|------|-------|--------------|--------------------------------------------------------------------------------------------------------------------------------------------------------------------------------------------------------------------------------------------------------------------------------------------------------------------------------------------------------------------------------------------------------------------------------------------------------------------------------------------------------------------------------------------------------------------------------------------------------------------------------------------------------------------------------------------------------------------------------------------------------------------------------------------------------------------------------------------------------------------------------------------------|
| <p><b>D32.</b> Nel seguente grafico sono rappresentati i dati relativi al numero di alberi piantati e al numero di alberi abbattuti in un bosco dal 2011 al 2015.</p> 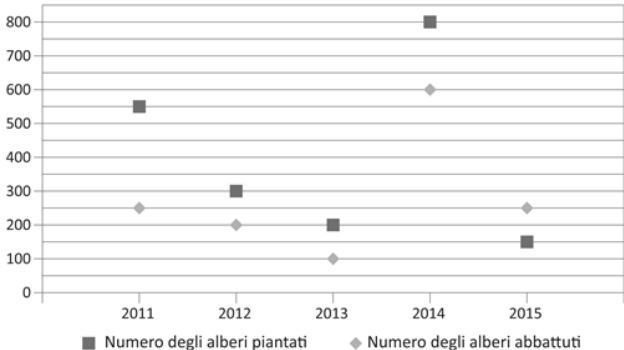 <p>■ Numero degli alberi piantati   ◆ Numero degli alberi abbattuti</p> <p>Sulla base dei dati riportati nel grafico, indica con una crocetta se ciascuna delle seguenti affermazioni è vera (V) o falsa (F).</p> <table><tr><th></th><th>V</th><th>F</th></tr><tr><td>a.</td><td>Nel 2011 il numero di alberi abbattuti è 550</td><td><input type="checkbox"/></td><td><input type="checkbox"/></td></tr><tr><td>b.</td><td>Nel 2013 il numero di alberi piantati è il doppio del numero di alberi abbattuti</td><td><input type="checkbox"/></td><td><input type="checkbox"/></td></tr><tr><td>c.</td><td>Nel 2011 la differenza tra il numero di alberi piantati e il numero di alberi abbattuti è inferiore a quella del 2014</td><td><input type="checkbox"/></td><td><input type="checkbox"/></td></tr></table> |                                                                                                                       | V                        | F                        | a. | Nel 2011 il numero di alberi abbattuti è 550 | <input type="checkbox"/> | <input type="checkbox"/> | b. | Nel 2013 il numero di alberi piantati è il doppio del numero di alberi abbattuti | <input type="checkbox"/> | <input type="checkbox"/> | c. | Nel 2011 la differenza tra il numero di alberi piantati e il numero di alberi abbattuti è inferiore a quella del 2014 | <input type="checkbox"/> | <input type="checkbox"/> | <p><b>AMBITO PREVALENTE</b><br/>Dati e previsioni</p> <p><b>SCOPO DELLA DOMANDA</b><br/>Leggere e interpretare i dati rappresentati in un grafico per confrontare l'andamento di due fenomeni.</p> <p><b>Indicazioni nazionali: TRAGUARDO</b><br/>Ricerca dati per ricavare informazioni e costruisce rappresentazioni (tabelle e grafici). Ricava informazioni anche da dati rappresentati in tabelle e grafici.</p> <p><b>Indicazioni nazionali: OBIETTIVO</b><br/><i>Rappresentare relazioni e dati e, in situazioni significative, utilizzare le rappresentazioni per ricavare informazioni, formulare giudizi e prendere decisioni.</i></p> <p><b>DIMENSIONE</b><br/>Conoscere</p> <p><b>RISULTATI DEL CAMPIONE</b></p> <table><tr><th>Item</th><th>Errata</th><th>Corretta</th></tr><tr><td><b>D32 aggregata</b></td><td>71,6%</td><td><b>28,4%</b></td></tr></table><br><table><tr><th>Item</th><th>Mancante</th><th>Vero</th><th>Falso</th></tr><tr><td><b>D32a</b></td><td>1,3%</td><td>24,2%</td><td><b>74,5%</b></td></tr><tr><td><b>D32b</b></td><td>1,4%</td><td><b>75,2%</b></td><td>23,4%</td></tr><tr><td><b>D32c</b></td><td>1,5%</td><td>55,1%</td><td><b>43,4%</b></td></tr></table> | Item | Errata | Corretta | <b>D32 aggregata</b> | 71,6% | <b>28,4%</b> | Item | Mancante | Vero | Falso | <b>D32a</b> | 1,3% | 24,2% | <b>74,5%</b> | <b>D32b</b> | 1,4% | <b>75,2%</b> | 23,4% | <b>D32c</b> | 1,5% | 55,1% | <b>43,4%</b> | <p><b>Risposta corretta: F V F</b></p> <p>Il quesito richiede di leggere e interpretare un grafico in cui è rappresentato l'andamento di due distribuzioni (piantazione alberi e abbattimento alberi) in un determinato intervallo temporale. In particolare, lo studente deve:</p> <ul style="list-style-type: none"><li>– verificare il valore relativo ad una delle due distribuzioni in un determinato anno</li><li>– operare un confronto tra valori relativi alle due distribuzioni in una determinata annualità</li><li>– operare un confronto tra differenze di valori relativi alle due distribuzioni in annualità differenti.</li></ul> <p>Una possibile difficoltà potrebbe essere costituita dal fatto che per operare correttamente i confronti è necessario prendere in considerazione simultaneamente i dati relativi alle due distribuzioni nella loro evoluzione temporale.</p> |
|                                                                                                                                                                                                                                                                                                                                                                                                                                                                                                                                                                                                                                                                                                                                                                                                                                                                                                                                                                                                                                                                               | V                                                                                                                     | F                        |                          |    |                                              |                          |                          |    |                                                                                  |                          |                          |    |                                                                                                                       |                          |                          |                                                                                                                                                                                                                                                                                                                                                                                                                                                                                                                                                                                                                                                                                                                                                                                                                                                                                                                                                                                                                                                                                                                                                                                                         |      |        |          |                      |       |              |      |          |      |       |             |      |       |              |             |      |              |       |             |      |       |              |                                                                                                                                                                                                                                                                                                                                                                                                                                                                                                                                                                                                                                                                                                                                                                                                                                                                                                  |
| a.                                                                                                                                                                                                                                                                                                                                                                                                                                                                                                                                                                                                                                                                                                                                                                                                                                                                                                                                                                                                                                                                            | Nel 2011 il numero di alberi abbattuti è 550                                                                          | <input type="checkbox"/> | <input type="checkbox"/> |    |                                              |                          |                          |    |                                                                                  |                          |                          |    |                                                                                                                       |                          |                          |                                                                                                                                                                                                                                                                                                                                                                                                                                                                                                                                                                                                                                                                                                                                                                                                                                                                                                                                                                                                                                                                                                                                                                                                         |      |        |          |                      |       |              |      |          |      |       |             |      |       |              |             |      |              |       |             |      |       |              |                                                                                                                                                                                                                                                                                                                                                                                                                                                                                                                                                                                                                                                                                                                                                                                                                                                                                                  |
| b.                                                                                                                                                                                                                                                                                                                                                                                                                                                                                                                                                                                                                                                                                                                                                                                                                                                                                                                                                                                                                                                                            | Nel 2013 il numero di alberi piantati è il doppio del numero di alberi abbattuti                                      | <input type="checkbox"/> | <input type="checkbox"/> |    |                                              |                          |                          |    |                                                                                  |                          |                          |    |                                                                                                                       |                          |                          |                                                                                                                                                                                                                                                                                                                                                                                                                                                                                                                                                                                                                                                                                                                                                                                                                                                                                                                                                                                                                                                                                                                                                                                                         |      |        |          |                      |       |              |      |          |      |       |             |      |       |              |             |      |              |       |             |      |       |              |                                                                                                                                                                                                                                                                                                                                                                                                                                                                                                                                                                                                                                                                                                                                                                                                                                                                                                  |
| c.                                                                                                                                                                                                                                                                                                                                                                                                                                                                                                                                                                                                                                                                                                                                                                                                                                                                                                                                                                                                                                                                            | Nel 2011 la differenza tra il numero di alberi piantati e il numero di alberi abbattuti è inferiore a quella del 2014 | <input type="checkbox"/> | <input type="checkbox"/> |    |                                              |                          |                          |    |                                                                                  |                          |                          |    |                                                                                                                       |                          |                          |                                                                                                                                                                                                                                                                                                                                                                                                                                                                                                                                                                                                                                                                                                                                                                                                                                                                                                                                                                                                                                                                                                                                                                                                         |      |        |          |                      |       |              |      |          |      |       |             |      |       |              |             |      |              |       |             |      |       |              |                                                                                                                                                                                                                                                                                                                                                                                                                                                                                                                                                                                                                                                                                                                                                                                                                                                                                                  |
| Item                                                                                                                                                                                                                                                                                                                                                                                                                                                                                                                                                                                                                                                                                                                                                                                                                                                                                                                                                                                                                                                                          | Errata                                                                                                                | Corretta                 |                          |    |                                              |                          |                          |    |                                                                                  |                          |                          |    |                                                                                                                       |                          |                          |                                                                                                                                                                                                                                                                                                                                                                                                                                                                                                                                                                                                                                                                                                                                                                                                                                                                                                                                                                                                                                                                                                                                                                                                         |      |        |          |                      |       |              |      |          |      |       |             |      |       |              |             |      |              |       |             |      |       |              |                                                                                                                                                                                                                                                                                                                                                                                                                                                                                                                                                                                                                                                                                                                                                                                                                                                                                                  |
| <b>D32 aggregata</b>                                                                                                                                                                                                                                                                                                                                                                                                                                                                                                                                                                                                                                                                                                                                                                                                                                                                                                                                                                                                                                                          | 71,6%                                                                                                                 | <b>28,4%</b>             |                          |    |                                              |                          |                          |    |                                                                                  |                          |                          |    |                                                                                                                       |                          |                          |                                                                                                                                                                                                                                                                                                                                                                                                                                                                                                                                                                                                                                                                                                                                                                                                                                                                                                                                                                                                                                                                                                                                                                                                         |      |        |          |                      |       |              |      |          |      |       |             |      |       |              |             |      |              |       |             |      |       |              |                                                                                                                                                                                                                                                                                                                                                                                                                                                                                                                                                                                                                                                                                                                                                                                                                                                                                                  |
| Item                                                                                                                                                                                                                                                                                                                                                                                                                                                                                                                                                                                                                                                                                                                                                                                                                                                                                                                                                                                                                                                                          | Mancante                                                                                                              | Vero                     | Falso                    |    |                                              |                          |                          |    |                                                                                  |                          |                          |    |                                                                                                                       |                          |                          |                                                                                                                                                                                                                                                                                                                                                                                                                                                                                                                                                                                                                                                                                                                                                                                                                                                                                                                                                                                                                                                                                                                                                                                                         |      |        |          |                      |       |              |      |          |      |       |             |      |       |              |             |      |              |       |             |      |       |              |                                                                                                                                                                                                                                                                                                                                                                                                                                                                                                                                                                                                                                                                                                                                                                                                                                                                                                  |
| <b>D32a</b>                                                                                                                                                                                                                                                                                                                                                                                                                                                                                                                                                                                                                                                                                                                                                                                                                                                                                                                                                                                                                                                                   | 1,3%                                                                                                                  | 24,2%                    | <b>74,5%</b>             |    |                                              |                          |                          |    |                                                                                  |                          |                          |    |                                                                                                                       |                          |                          |                                                                                                                                                                                                                                                                                                                                                                                                                                                                                                                                                                                                                                                                                                                                                                                                                                                                                                                                                                                                                                                                                                                                                                                                         |      |        |          |                      |       |              |      |          |      |       |             |      |       |              |             |      |              |       |             |      |       |              |                                                                                                                                                                                                                                                                                                                                                                                                                                                                                                                                                                                                                                                                                                                                                                                                                                                                                                  |
| <b>D32b</b>                                                                                                                                                                                                                                                                                                                                                                                                                                                                                                                                                                                                                                                                                                                                                                                                                                                                                                                                                                                                                                                                   | 1,4%                                                                                                                  | <b>75,2%</b>             | 23,4%                    |    |                                              |                          |                          |    |                                                                                  |                          |                          |    |                                                                                                                       |                          |                          |                                                                                                                                                                                                                                                                                                                                                                                                                                                                                                                                                                                                                                                                                                                                                                                                                                                                                                                                                                                                                                                                                                                                                                                                         |      |        |          |                      |       |              |      |          |      |       |             |      |       |              |             |      |              |       |             |      |       |              |                                                                                                                                                                                                                                                                                                                                                                                                                                                                                                                                                                                                                                                                                                                                                                                                                                                                                                  |
| <b>D32c</b>                                                                                                                                                                                                                                                                                                                                                                                                                                                                                                                                                                                                                                                                                                                                                                                                                                                                                                                                                                                                                                                                   | 1,5%                                                                                                                  | 55,1%                    | <b>43,4%</b>             |    |                                              |                          |                          |    |                                                                                  |                          |                          |    |                                                                                                                       |                          |                          |                                                                                                                                                                                                                                                                                                                                                                                                                                                                                                                                                                                                                                                                                                                                                                                                                                                                                                                                                                                                                                                                                                                                                                                                         |      |        |          |                      |       |              |      |          |      |       |             |      |       |              |             |      |              |       |             |      |       |              |                                                                                                                                                                                                                                                                                                                                                                                                                                                                                                                                                                                                                                                                                                                                                                                                                                                                                                  |

| Domanda                                                                                                                                                                                                                                                                                                                                | Caratteristiche                                                                                                                                                                                                                                                                                                                                                                                                                                                                                                                                                                                                                                                                                                                                                                 | Descrizione e commento |          |        |          |     |      |       |       |                                                                                                                                                                                                                                                                                                                                                                                                                                                                                                                                                                                                                                                                                                                                                                                                                 |
|----------------------------------------------------------------------------------------------------------------------------------------------------------------------------------------------------------------------------------------------------------------------------------------------------------------------------------------|---------------------------------------------------------------------------------------------------------------------------------------------------------------------------------------------------------------------------------------------------------------------------------------------------------------------------------------------------------------------------------------------------------------------------------------------------------------------------------------------------------------------------------------------------------------------------------------------------------------------------------------------------------------------------------------------------------------------------------------------------------------------------------|------------------------|----------|--------|----------|-----|------|-------|-------|-----------------------------------------------------------------------------------------------------------------------------------------------------------------------------------------------------------------------------------------------------------------------------------------------------------------------------------------------------------------------------------------------------------------------------------------------------------------------------------------------------------------------------------------------------------------------------------------------------------------------------------------------------------------------------------------------------------------------------------------------------------------------------------------------------------------|
| <p>D33. Aggiungi dei cuori nel riquadro in modo che la frase scritta a fianco sia vera.</p> <p>Il 50% delle figure sono cuori.</p> <div><div>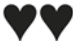</div><div>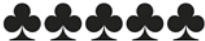</div></div> | <p><b>AMBITO PREVALENTE</b><br/>Numeri</p> <p><b>SCOPO DELLA DOMANDA</b><br/>Completare un insieme di elementi in modo che sia rispettato un rapporto dato, espresso in percentuale.</p> <p><b>Indicazioni nazionali: TRAGUARDO</b><br/>Riconosce e utilizza rappresentazioni diverse di oggetti matematici (numeri decimali, frazioni, percentuali, scale di riduzione, ...).</p> <p><b>Indicazioni nazionali: OBIETTIVO</b><br/><i>Utilizzare numeri decimali, frazioni e percentuali per descrivere situazioni quotidiane.</i></p> <p><b>DIMENSIONE</b><br/>Risolvere problemi</p> <p><b>RISULTATI DEL CAMPIONE</b></p> <table><tr><th>Item</th><th>Mancante</th><th>Errata</th><th>Corretta</th></tr><tr><td>D33</td><td>4,2%</td><td>19,0%</td><td>76,8%</td></tr></table> | Item                   | Mancante | Errata | Corretta | D33 | 4,2% | 19,0% | 76,8% | <p><b>Risposta corretta:</b></p> <div><div>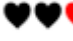</div><div>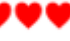</div><div>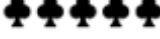</div></div> <p>Il quesito richiede di completare un'immagine in modo tale che il numero di cuori nell'immagine presente nel testo corrisponda al 50% del numero di elementi totali dell'immagine stessa.</p> <p>Un possibile errore potrebbe derivare da un'errata comprensione dell'informazione presente nel testo, che porterebbe a disegnare mezzo cuore anziché tre, ottenendo così che il numero dei cuori corrisponda al 50% del numero dei fiori presenti nell'immagine.</p> |
| Item                                                                                                                                                                                                                                                                                                                                   | Mancante                                                                                                                                                                                                                                                                                                                                                                                                                                                                                                                                                                                                                                                                                                                                                                        | Errata                 | Corretta |        |          |     |      |       |       |                                                                                                                                                                                                                                                                                                                                                                                                                                                                                                                                                                                                                                                                                                                                                                                                                 |
| D33                                                                                                                                                                                                                                                                                                                                    | 4,2%                                                                                                                                                                                                                                                                                                                                                                                                                                                                                                                                                                                                                                                                                                                                                                            | 19,0%                  | 76,8%    |        |          |     |      |       |       |                                                                                                                                                                                                                                                                                                                                                                                                                                                                                                                                                                                                                                                                                                                                                                                                                 |



| Domanda                                                                                                                                                                                                                                                                                                                                                                                                                                                                                                                                                                                                                                               | Caratteristiche                                                                                                                                                                                                                                                                                                                                                                                                                                                                                                                                                                                                                                                                                                                                                                                      | Descrizione e commento |          |      |      |   |   |     |      |      |       |      |      |                                                                                                                                                                                                                                                                                                                                                                      |
|-------------------------------------------------------------------------------------------------------------------------------------------------------------------------------------------------------------------------------------------------------------------------------------------------------------------------------------------------------------------------------------------------------------------------------------------------------------------------------------------------------------------------------------------------------------------------------------------------------------------------------------------------------|------------------------------------------------------------------------------------------------------------------------------------------------------------------------------------------------------------------------------------------------------------------------------------------------------------------------------------------------------------------------------------------------------------------------------------------------------------------------------------------------------------------------------------------------------------------------------------------------------------------------------------------------------------------------------------------------------------------------------------------------------------------------------------------------------|------------------------|----------|------|------|---|---|-----|------|------|-------|------|------|----------------------------------------------------------------------------------------------------------------------------------------------------------------------------------------------------------------------------------------------------------------------------------------------------------------------------------------------------------------------|
| <p>D34. Uno di questi solidi è formato da 3 rettangoli e 2 triangoli.</p> <p>Quale?</p> <div><div>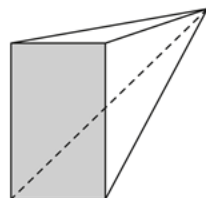<p><input type="checkbox"/> Solido A</p></div><div>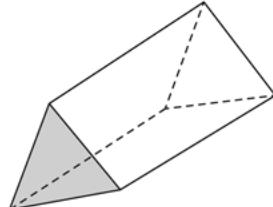<p><input type="checkbox"/> Solido B</p></div><div>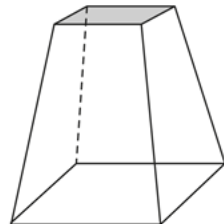<p><input type="checkbox"/> Solido C</p></div><div>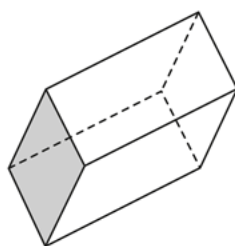<p><input type="checkbox"/> Solido D</p></div></div> | <p><b>AMBITO PREVALENTE</b><br/>Spazio figure</p> <p><b>SCOPO DELLA DOMANDA</b><br/>Identificare il solido che ha alcune caratteristiche date.</p> <p><b>Indicazioni nazionali: TRAGUARDO</b><br/>Riconosce e rappresenta forme del piano e dello spazio, relazioni e strutture che si trovano in natura o che sono state create dall'uomo.</p> <p><b>Indicazioni nazionali: OBIETTIVO</b><br/><i>Costruire e utilizzare modelli materiali nello spazio e nel piano come supporto a una prima capacità di visualizzazione.</i></p> <p><b>DIMENSIONE</b><br/>Conoscere</p> <p><b>RISULTATI DEL CAMPIONE</b></p> <table><tr><th>Item</th><th>Mancante</th><th>A</th><th>B</th><th>C</th><th>D</th></tr><tr><td>D34</td><td>1,6%</td><td>8,5%</td><td>76,2%</td><td>4,2%</td><td>9,5%</td></tr></table> | Item                   | Mancante | A    | B    | C | D | D34 | 1,6% | 8,5% | 76,2% | 4,2% | 9,5% | <p><b>Risposta corretta: B</b></p> <p>Il quesito richiede di individuare tra le figure date, il prisma a base triangolare che rispetta tutti i vincoli descritti nel testo.</p> <p>L'alunno può procedere per esclusione: tra le facce che compongono il solido A c'è un solo rettangolo, mentre tra quelle che compongono i solidi C e D non ci sono triangoli.</p> |
| Item                                                                                                                                                                                                                                                                                                                                                                                                                                                                                                                                                                                                                                                  | Mancante                                                                                                                                                                                                                                                                                                                                                                                                                                                                                                                                                                                                                                                                                                                                                                                             | A                      | B        | C    | D    |   |   |     |      |      |       |      |      |                                                                                                                                                                                                                                                                                                                                                                      |
| D34                                                                                                                                                                                                                                                                                                                                                                                                                                                                                                                                                                                                                                                   | 1,6%                                                                                                                                                                                                                                                                                                                                                                                                                                                                                                                                                                                                                                                                                                                                                                                                 | 8,5%                   | 76,2%    | 4,2% | 9,5% |   |   |     |      |      |       |      |      |                                                                                                                                                                                                                                                                                                                                                                      |
